# Supplementary material
Source: PubMed Central journal article supplement (PMC5389293)
Supplement: pnas.1619147114.sapp.pdf [file pnas.1619147114.sapp.pdf]

# Supplementary Information Appendix

## Experimental evidence that parasites drive eco-evolutionary feedbacks

### Contents

|                                                                                     |          |
|-------------------------------------------------------------------------------------|----------|
| <b>SI Supplementary Methods</b>                                                     | <b>3</b> |
| SI.1 Further details on parasite exposure . . . . .                                 | 3        |
| SI.2 Further details on mesocosm setup and sampling at the end of phase 1 . . . . . | 3        |
| SI.3 Further details on preparation and sampling of phase 2 . . . . .               | 4        |
| SI.4 Further details on common garden experiment . . . . .                          | 4        |
| SI.5 Further details on molecular analyses . . . . .                                | 5        |
| SI.6 Further details on statistical analyses . . . . .                              | 5        |
| <b>SI Supplementary Discussion</b>                                                  | <b>7</b> |

### List of Figures

|   |                                                                                                                         |    |
|---|-------------------------------------------------------------------------------------------------------------------------|----|
| 1 | <b>Figure-S1.</b> Gene expression responses of lab-reared adults to parasite exposure in common garden setting. . . . . | 8  |
| 2 | <b>Figure-S2.</b> Parallelism between gene expression responses in mesocosms and common garden setting. . . . .         | 9  |
| 3 | <b>Figure-S3.</b> Effects of phase 1 ecosystem modifications on phase 2 fish survival. . . . .                          | 10 |

### List of Tables

|                                                                                                                                                                            |    |
|----------------------------------------------------------------------------------------------------------------------------------------------------------------------------|----|
| <b>Table S1:</b> Effects of the experimental treatments (in phase 1) on fish mortality, infection intensity (i.i.), and metabolic condition (hepatosomatic index). . . . . | 11 |
| <b>Table S2:</b> Functions and primers for the 28 genes used in this study. . . . .                                                                                        | 12 |
| <b>Table S3a:</b> Multivariate perMANOVAs testing the effects of experimental treatments on gene expression profiles of adult fish in phase 1. . . . .                     | 15 |
| <b>Table S3b:</b> Univariate LMMs testing the effects of experimental treatments on each gene. . . . .                                                                     | 18 |
| <b>Table S4a.</b> Multivariate analysis on gene expression profiles for lab-bred adults in a common garden setting. . . . .                                                | 25 |
| <b>Table S4b.</b> Univariate LMMs testing the effects of parasite exposure in lab-bred adults in a common garden setting. . . . .                                          | 26 |
| <b>Table S5a:</b> Results of multivariate analyses from genes to ecosystems . . . . .                                                                                      | 27 |
| <b>Table S5b:</b> Univariate LMMs testing effects of experimental treatments on each prey category, zooplanktoncategory, and ecosystem measurement. . . . .                | 30 |
| <b>Table S6:</b> Introduction and survival of phase 2 fish . . . . .                                                                                                       | 39 |
| <b>Table S7:</b> Effects of phase 1 on survival, selection and body condition of juveniles in phase 2. . . . .                                                             | 40 |

|                                                                                                                                                                            |    |
|----------------------------------------------------------------------------------------------------------------------------------------------------------------------------|----|
| <b>Table S8a:</b> Multivariate perMANOVAs testing the effects of the experimental treatments from phase 1 on gene expression profiles of juvenile fish in phase 2. . . . . | 41 |
| <b>Table S8b:</b> Univariate LMMs testing the effects of experimental treatments from phase 1 on each gene of juvenile fish in phase 2 . . . . .                           | 44 |

## SI Supplementary Methods

### SI.1 Further details on parasite exposure

All fish were kept under standard conditions for 24 to 45 days after collection before entering the experiment. All experimental fish were disinfected on the same dates by a 1-hour exposure to 1:4000 Formalin dilution on three consecutive days (modified from [1]). Experimental infection was achieved by manual transfer of *Gyrodactylus* spp. individuals from non-disinfected sticklebacks collected from the same lake and stream populations. All experimental fish were anaesthetized in a 0.1M MS-222 solution before infection or control treatment and non-disinfected parasite source fish were euthanized in a 1M MS-222 solution before parasites were picked off. Two individual parasites from each of the lake and stream environments were transferred. Fifty-eight *Gyrodactylus* individuals from the same parasite source fish were preserved for molecular species identification by sequencing of the ITS1 region [2] and confirmed to be *G. gasterostei* (50 individuals) and *G. arcuatus* (8 individuals), with both parasite species occurring on both host ecotypes in the wild. Control fish were handled similarly without parasite transfer (P contrast). After infection or control treatment, fish were kept in their respective experimental groups in laboratory aquaria for one week before transfer to outdoor mesocosms.

### SI.2 Further details on mesocosm setup and sampling at the end of phase 1

The mesocosms were plastic tanks of one cubic meter. They were filled with a 5cm layer of gravel and sand, sediment collected from lake Lucerne and a nearby stream (47°00'45.1"N 8°18'41.4"E). Lake water and a concentrated zooplankton inoculum from Lake Lucerne and Lake Constance were also used. Mesocosms were arranged in blocks of 8 tanks and input material was distributed block-wise. Within each block, we established contrasting nutrient environments by adding nutrient solution aliquots of 20ml containing NaNO<sub>3</sub> and HNa<sub>2</sub>PO<sub>4</sub>. Initial nutrient concentrations were 640µg/L Nitrogen + 40µg/L Phosphorus and 80µg/L Nitrogen + 5µg/L Phosphorus in high and low nutrient tanks respectively (E contrast). For the first phase of the experiment, we introduced three-spined sticklebacks of either lake or stream origin to establish the host ecotype contrast (H). Each mesocosm initially contained a standardized total biomass of fish of 12.5±4.4g consisting of groups of 6 or 7 fish. We collected ecosystem samples 6 weeks after fish introduction to the mesocosms and removed the fish one week later. Ecosystem samples consisted in measuring a series of physico-chemical parameters (11 parameters including nutrients, NH<sub>4</sub>, and DOC concentration, turbidity and DOC-abs), biological parameters (5 parameters including chlorophyll concentration, zooplankton size, and bacterial counts), ecosystem processes (7 parameters including gross primary productivity, bacterial respiration, and sedimentation), and zooplankton community (12 parameters including abundance of cladocerans, copepods, and rotifers). Individual ecosystem parameters are listed in Table S5b. After euthanasia of the fish in 1M MS-222, *Gyrodactylus* specimens were counted on each fish before morphological measurements and dissection. 35 *Gyrodactylus* individuals were successfully sequenced at the ITS region and identified as *G. arcuatus* in 34 cases and *G. gasterostei* in 1 case. Organs were taken out, livers were weighed for estimating metabolic condition (Hepatosomatic index), spleens were stored in RNA later for gene expression analysis, and stomachs were used for diet assessment. For diet analysis, prey items were identified to the lowest possible taxonomic level [3, 4, 5] and counted on a 2.5x2.5mm grid under a binocular. Non-aquatic adult insects were classified together as imago and digested prey as unidentified

material.

### SI.3 Further details on preparation and sampling of phase 2

After removal of phase 1 fish, groups of juvenile lab-bred sticklebacks were introduced into the tanks modified throughout phase 1 of the experiment. Each tank received lake, hybrid and stream juvenile fish originating from the same number of different fish families and consistent family distribution within blocks. Juveniles were introduced into mesocosms in two cohorts (7 - 33 days post-hatching, depending on hatching date). The first cohort was introduced one day after removal of first phase fish and the second cohort 32 days later and kept in separate aquaria under common garden conditions for 7 days, after grouping them with an average mortality of 62.5% in that time. Mortality was higher among lake and hybrid juveniles than among stream families (binomial GLM,  $z_{Stream} = -4.83$ ,  $P < 0.001$ ), but mortality was unrelated to experimental treatments in the destination mesocosms (binomial GLM, all  $X^2 < 1.76$ , all  $P > 0.19$ ). Juveniles were not treated individually, but the first cohort was exposed group-wise to a euthanized first phase fish from the same tank for 5 hours in a 2L aquarium for potential parasite transmission. The second cohort was introduced to the mesocosms immediately after group assembly and not exposed to parasites at all, such that 16 naive fish entered each mesocosm. Table S6 contains a full description of juvenile fish introduction and survival for each tank.

All surviving fish were caught three months after the first juvenile cohort was introduced to the mesocosms. As with phase 1 fish, after euthanasia in a 1M MS-222 bath *Gyrodactylus* specimen were counted on each fish before length and weight measurements and removal of spleens and livers for gene expression assays. Spleens and livers were pooled for gene expression analysis in this cohort as spleens alone were too small for sufficient RNA yield. Only 10 of the 407 scanned individuals were infected with *Gyrodactylus* at the end of the experiment, with no significant effects of any previous treatment on infection levels in this second generation (binomial GLMMs, all  $X^2 < 2.03$ , all  $P > 0.15$ , Table S7). We also confirmed that effects detected in gene expression profiles and body condition were robust to removal of these few infected individuals from analyses (results as presented in Table S7 and S8 do not change qualitatively), and consequently infection intensities were excluded from the analyses of the second fish generation.

### SI.4 Further details on common garden experiment

Lab-bred sticklebacks of pure lake and stream origin were raised in the lab for one year on the same diet, namely artemia during the first month of their life and on frozen chironomids later on. These fish were disinfected with formalin on three subsequent days in the same way as the mesocosm fish. We then set up experimental groups of three fish, either of lake or stream origin and either exposed to *Gyrodactylus* from both wild populations as described above or not. Three replicate blocks of these four experimental groups were set up, each of them kept in one of 12 separate black 300 L outdoor tanks for a total of 36 fish. Fish were kept in these groups and fed with frozen chironomids every second day over the course of five weeks. Then they were euthanized and dissected in the same way as the mesocosm fish. One fish died before sample collection and the spleen sample of one fish did not yield good quality gene expression data, so that 34 fish were included in the analyses.

## SI.5 Further details on molecular analyses

Because transcriptome analyses have been conducted with lake and stream three-spined sticklebacks [6], we used a target gene approach, measuring relative mRNA levels in microfluidic qPCR assays on Fluidigm 96.96 Dynamic Array IFCs on the BioMark System using EvaGreen DNA Binding Dye (Biotium) according to the Advanced Development Protocol 14 (PN 100-1208 B) by Fluidigm. Gene expression assays included 4 reference genes (ubiquitin (*ubc*), L13A ribosomal binding protein (*rpl13a*), beta-2-microglobulin (*b2m*), elongation factor *ef1 $\alpha$*  (*eef1a*) [7]) and 28 target genes. These target genes spanned metabolic functions (*fabp2*, *gapdh*, *acadsb*, *rab11a1*, *ctrc*), the general stress response (*hsp70*, *hsp90*, *nr3c1*), innate cellular (*sod2*, *vegfa*, *tf*, *sla1*, *ogfr*, *tlr2*) and innate humoral immune response (*f2*, *saal1*), innate immune signaling (*socs1*, *cd97*, *mif*, *il1b*, *tgfb1*, *tnfa*) as well as the complement system (*c7*, *c9*, ) and the adaptive immune system (*ighm*, *ly75*, *il16*, *mhcll*). Further information on gene functions and primer details can be found in Table S2. Primers for reference genes were previously published [7] as well as primers for *mhcll* [8]. All new primers were designed in quantprime [9]. The combination of *ubc* and *rpl13a* was found to be the most stable composite reference value with *geNorm* [10] ( $M=0.721$ ,  $CV=0.243$ ) and was therefore used to calculate  $\Delta Ct$  values.

Juveniles were genotyped at 7 microsatellite loci (Stich5196, Stich4170, Stich1125, Stich1097, Stich7033, STN18, STN75) for ecotype determination. All 7 microsatellites were amplified in one multiplex reaction, using the Multiplex PCR Master Mix by Qiagen and previously published primers [11] and the following PCR protocol: 95°C for 15min, 25 cycles of 30s at 94°C, 90s at 58°C, 60s at 72°C and a final 30min at 60°C. Microsatellite data was then collected on a 3100 Genetic Analyzer (ABI).

## SI.6 Further details on statistical analyses

All statistical analyses were performed in R version 3.1.0 [12]. Linear mixed effect models (LMM) and generalized linear mixed effect models (GLMM) were performed with the *lme4* and *MASS* packages (for infection intensity test); while p-values were obtained with Anova (*car*) by performing Type II  $X^2$  or F tests with Kenward-Roger degrees of freedom. The standardized model structure tested for the effects of phase 1 experimental treatments: parasite exposure (P), host ecotype (H), ecosystem nutrient levels (E) and their interactions as fixed structure with block as a random factor. Univariate analyses on individual fish characteristics such as parasite burden, fish condition, gene expression and survival also included tank identity nested within block as a random effect. Significance levels among univariate results were adjusted for multiple testing within each functional parameter group (gene groups, diet, zooplankton, ecosystem parameter groups) by FDR correction according to Benjamini-Yekutieli [13]. Multivariate analyses such as permutational multivariate analysis of variance (perMANOVA) and redundancy analysis (RDA) were performed using the *vegan*-package and controlled for the effects of block and tank when necessary.

The effects of experimental treatments on individual infection intensity were tested with a Penalized Quasi Maximum Likelihood GLMM (*glmmPQL*) with negative binomial error distribution, including fish standard length as an offset in *MASS* R-package ( $\theta = 0.223$ ,  $\text{link} = \text{"sqrt"}$ ). Then, we analyzed effects of infection intensity and experimental treatments on individual fish condition. Fish condition was calculated as the hepatosomatic index (HSI) =  $1000 \times \text{liver wet-mass (mg)}/\text{fish mass (mg)}$ . HSI was tested with an LMM using infection intensity as well as the experimental treatments as fixed structure (Table S1). Furthermore,

we tested if mortality was significantly different between treatments during phase 1 of the experiment with a binomial GLMM, on the live:dead ratio at the end of this phase.

Mean prey preferences and mean zooplankton abundance per tank were Hellinger transformed and then tested in a distance-based redundancy analysis (db-RDA) for treatment effects (60). For multivariate analyses of the ecosystem level, we scaled each ecosystem parameter (mean=0,  $\pm 1$  SD) and then tested for experimental treatment effects in an RDA. Significant effects of each RDA were obtained by permuting treatments 9999 times within each block with the function `anova.cca` (`by=term`, `strata=block`). For univariate analyses, we standardized all LMMs and GLMMs for diet, zooplankton and ecosystem parameters to  $\pm 2$  SD in a model average framework following Grueber et al [14] and Gelman et al [15], to calculate the relative importance (RI) and standardized effect sized (ES) in Table S5b.

Gene expression was analyzed as  $\Delta$ Ct values [16]. For comparison among biological levels, gene expression data was analyzed in an RDA in the same way as ecosystem parameters. Further gene expression analyses of fish from phase 1 were performed once for the complete dataset to evaluate three-way interactions but interpreted according to separate analyses for lake and stream fish as reference gene expression differed between fish ecotypes. Multivariate effects were assessed with perMANOVA on data averaged within experimental tank. PerMANOVA results were calculated using `adonis` (`vegan`) with 999 permutations on a Pearson distance matrix obtained with `Dist` (`amap`) and stratifying data within Blocks (Tables S3a, S4a and S8a). Univariate effects were assessed in LMMs and with Yeo-Johnson transformation where necessary prior to model testing if residual distributions were non-normal or heteroscedastic ( $\lambda$ -values for transformations are listed with the respective LMM output in Tables S3b, S4b and S8b). To correct for the possible dependence of gene expression on fish size we included standard length as prior weights in the linear mixed effect models. Gene expression data from the common garden experiment was analyzed the same way but included only parasite exposure and ecotype as fixed effects and was carried out only in joint models for both ecotypes.

Juvenile stocking differences between tanks (19-39/tank) were statistically accounted for by including tank as a random factor in individual based tests (i.e. survival, body condition and LMMs for gene expression) and by including stocking numbers in tank based tests (i.e. as prior weights in LMMs for selection coefficients and as covariate in perMANOVAs for gene expression). Survival differences between lake, hybrid and stream juveniles (according to their parents origin as determined with microsatellites) were tested with a Pearson's  $\chi^2$ -test. Then we tested for effects of phase 1 treatments on juvenile survival using binomial GLMMs with survival rates from each tank as the response variable and phase 1 experimental treatments as fixed factors. The same model was run for all juveniles together and for each juvenile ecotype individually. We further calculated the selection coefficient  $S$  against each juvenile ecotype as the change in frequency of the ecotype relative to the frequency of the fittest genotype, subtracted from 1, within each tank [17]. Effects of phase 1 ecosystem modifications on viability selection were tested in linear mixed models for each juvenile ecotype separately (Table S7). To evaluate second generation fish body condition, we calculated the relative weight  $W_{rel}$  [18] as a percentage of the average expected weight for a given fish size according to a logarithmic length-weight regression. These  $W_{rel}$  values were analyzed in an LMM using the `lme4` package. For fish from phase 2, we analyzed experimental treatment effects on body condition in three subgroups (lake, hybrid or stream) (Table S7). Gene expression data of these fish was analyzed separately for lake, hybrid and stream fish for consistency with phase 1 fish (Table S8a and S8b). Statistical methods

for gene expression analysis were the same as for phase 1, except for the inclusion of stocking numbers as a covariate in perMANOVAs.

To determine if differential expression between ecotypes was similar between environments, we calculated the ratio between experiments (mesocosm/common garden) of the difference between ecotypes (stream-lake) and tested (using a 2-tailed t-test) whether the value of this ratio (i.e. the slope see Fig-S2A-B) was significantly different from either 0 or 1. Additionally, we determined whether stream and lake fish showed parallel responses to infection Fig-S2C) by testing whether the directional expression responses across all 28 genes, between our pair of environments (common garden v.s. mesocosm), were more similar than expected by chance using a McNemar test [19, 20].

## SI Supplementary Discussion

We found many instances of three-way interactions of parasite exposure x fish ecotype x nutrient loading in the eco-evolutionary feedback from first phase ecosystem manipulations to the relative fitness of juveniles in the second experimental phase. For instance, selection against lake juveniles shows that lake fish are at a selective disadvantage when mesocosms are nutrient poor and have been modified by lake adults under parasite pressure. This indicates that preferred resources of one ecotype can be depleted and might cause a negative feedback for this ecotype in the next generation, particularly under parasite exposure. When nutrient loads are increased (i.e. in eutrophic mesocosms), lake juveniles have similar survival rates as stream and hybrid juveniles in mesocosms modified by parasite exposed lake adults. This suggests that directional selection (driven by parasites) is reduced at higher nutrient levels because compensation is easier to achieve in productive environments. When parasite pressure is low however, lake juveniles are at a selective disadvantage under high nutrient conditions. One possible explanation is that the lake adults in phase 1 benefit from the simultaneous absence (or low level) of parasites and high nutrient levels to the extent that they deplete prey items preferred by lake fish again. Proving these suggested mechanism would require additional experiments, such as laboratory feeding trials of the different ecotypes with and without parasite pressure.

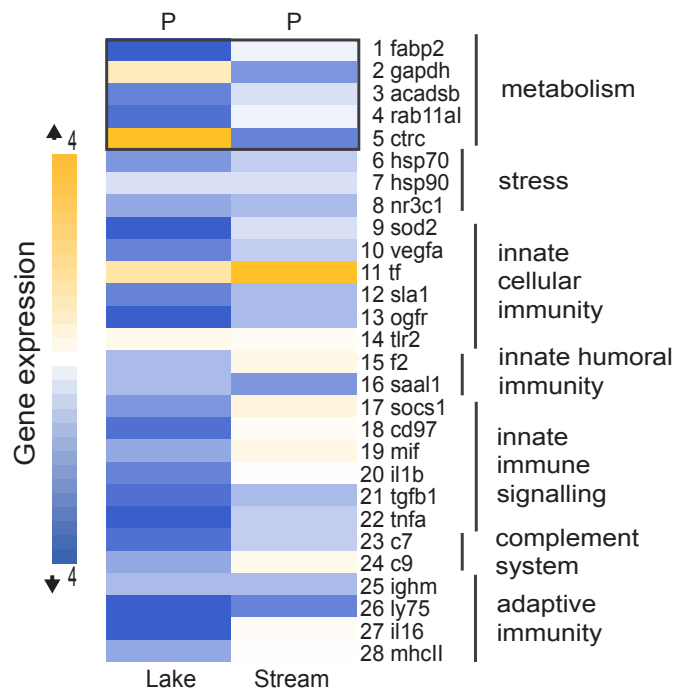

**Figure-S1.** Gene expression responses of lab-reared adults to parasite exposure in common garden setting, from fourfold down regulation to fourfold up regulation in parasitized vs. control manipulations (P). Significant expression changes for gene groups are highlighted by black outlines (lake: N=6, stream: N=6, test on tank averages). See Table S4a and Table S4b



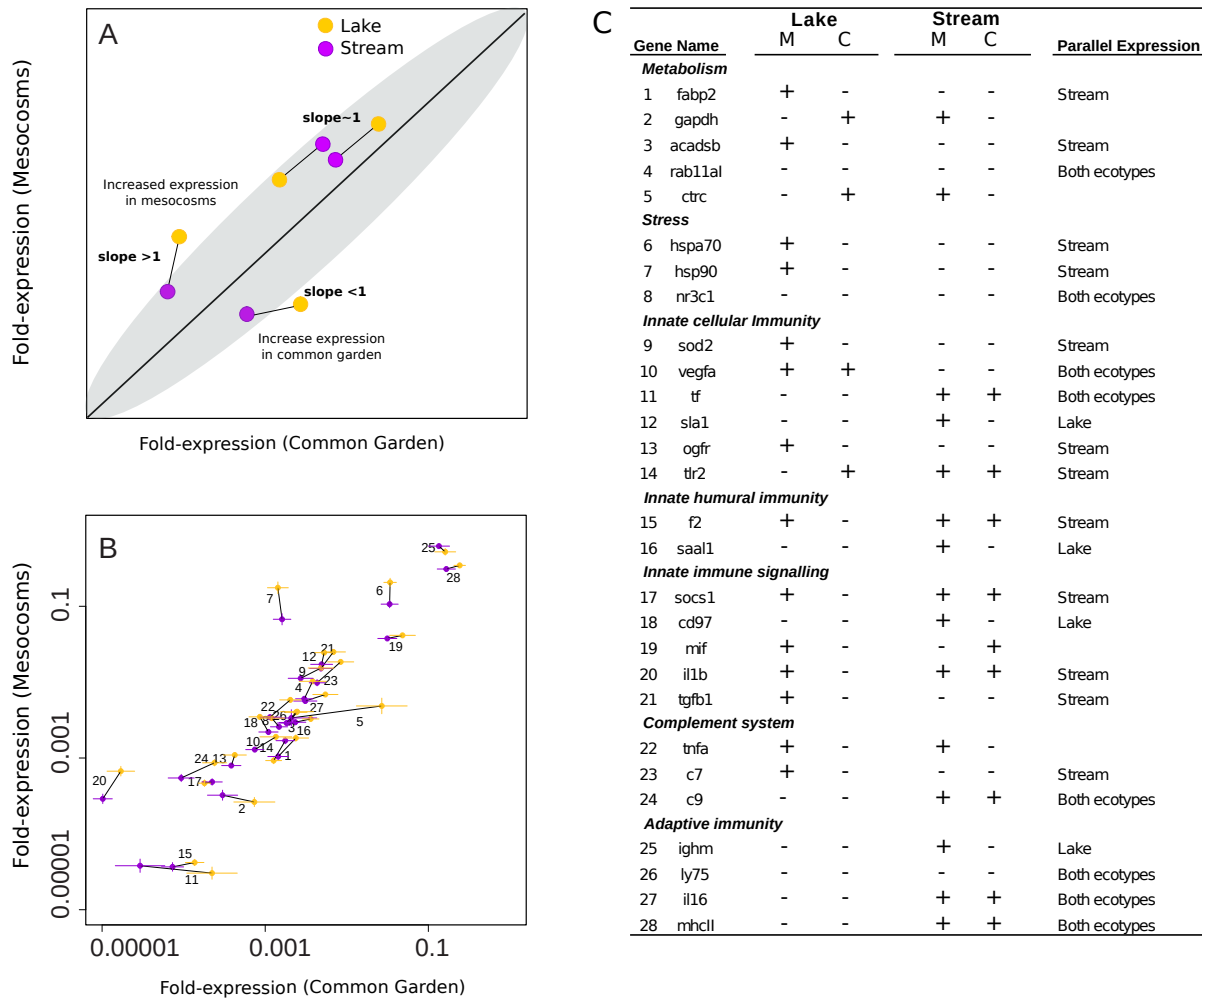

**Figure-S2.** Panel A: Conceptual figure for comparing patterns of gene expression in two contrasting environmental contexts: wild fish put into experimental mesocosms (M) and lab reared fish from a common garden (C) setting. First, considering both ecotypes together, we expected a positive correlation for gene expression between environments (grey shaded area). Second, we expected variation in the slopes connecting gene expression of lake and stream fish. When the slope is close to 1, we interpret this as evidence for parallel responses, because the divergence in gene expression between ecotypes is similar in both environments. If the slopes are significantly less than or greater than 1, this would indicate that the environmental context (M or C) has a large influence on the differences in gene expression between ecotypes. Panel B: We found support for both of our expectations illustrated in Panel A. First, there was a strong positive relationship (i.e. grey shaded area in Panel A) between levels of expression across all 28 genes ( $R^2=0.78$ ,  $t=6.443$ ,  $p<0.001$ ). This is consistent with a limited role for plasticity causing different levels of gene expression between environments (M vs. C). Second, there was variation in the slopes between ecotypes, and the mean slope was not significantly different from 1 (two sided t-test,  $t=0.506$ ,  $df=27$ ,  $p\text{-value}=0.617$ ). The slopes were also significantly positive (one sided t-test,  $t=1.739$ ,  $df=27$ ,  $p\text{-value}=0.047$ ), which is expected given that expression levels tended to be higher in the lake fish. Panel C: To determine whether stream and lake fish showed parallel responses to parasite (P) infection, we tested whether the directional expression responses across all 28 genes (based on log response ratios ( $\ln[+P/-P]$ ) between our pair of environments (M or C) were more similar than expected by chance [using a McNemar test, 19, 20]. We found that the direction of gene expression responses to parasites was significantly parallel between experiments for stream (McNemar test:  $b=12$ ,  $c=4$ ,  $p\text{-value}=0.077$ ) but not for lake fish (McNemar test:  $b=12$ ,  $c=1$ ,  $p\text{-value}=0.003$ ). Our analyses also show that gene expression was parallel between lake fish in mesocosms and stream fish in common garden (McNemar test:  $b=5$ ,  $c=10$ ,  $p\text{-value}=0.302$ ), but not between stream fish in mesocosms and lake fish in common garden (McNemar test:  $b=1$ ,  $c=12$ ,  $p\text{-value}=0.003$ ).

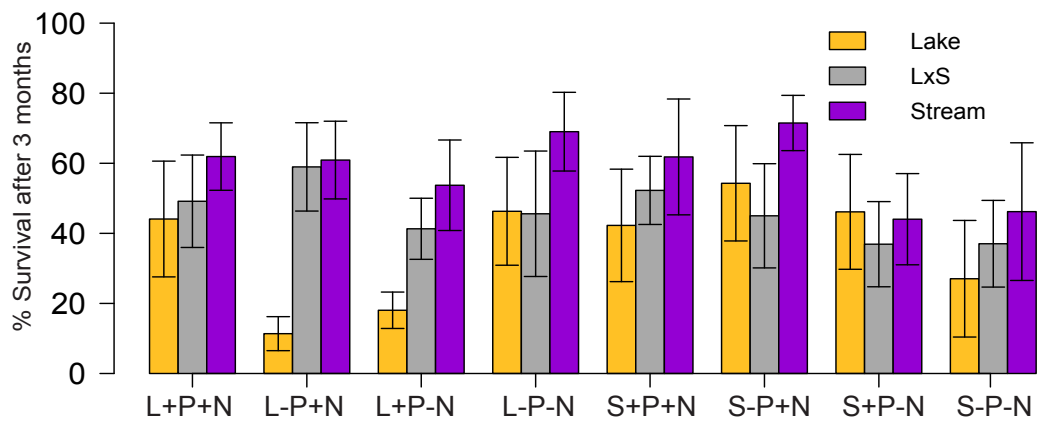

**Figure-S3.** Effects of phase 1 ecosystem modifications on phase 2 fish survival. Survival percentages of different stickleback genetic backgrounds in ecosystems modified by the phase 1 manipulations. Lake fish survival depends on an interaction of all previous ecosystem modification factors (P×H×E, N=280) and hybrid survival is affected by phase 1 nutrient manipulation (E, hybrids: N=265, stream: N=395). Data is shown as means ± SEM across 5 replicated tanks for each phase 1 treatment. See Table S7

**Table S1: Effects of the experimental treatments (in phase 1) on fish mortality, infection intensity (i.i.), and metabolic condition (hepatosomatic index).** Treatments correspond to the effects of host (H), environment (E), parasite exposure (P), and their interactions (e.g. HxE). Significant P values are highlighted in bold, and N is the number of tested individuals

| Treatment                | Df | Mortality      |              | <i>Gyrodactylus i.i.</i> |                  |                |              |                |       | Metabolic condition |              |                |              |                |              |
|--------------------------|----|----------------|--------------|--------------------------|------------------|----------------|--------------|----------------|-------|---------------------|--------------|----------------|--------------|----------------|--------------|
|                          |    | Both           |              | Both                     |                  | Lake host      |              | Stream host    |       | Both                |              | Lake host      |              | Stream host    |              |
|                          |    | X <sup>2</sup> | P            | X <sup>2</sup>           | P                | X <sup>2</sup> | P            | X <sup>2</sup> | P     | X <sup>2</sup>      | P            | X <sup>2</sup> | P            | X <sup>2</sup> | P            |
| <i>Gyrodactylus i.i.</i> | 1  |                |              |                          |                  |                |              |                |       | 3.847               | <b>0.050</b> | 4.454          | <b>0.035</b> | 2.139          | 0.144        |
| P                        | 1  | 0.233          | 0.629        | 0.008                    | 0.929            | 6.276          | <b>0.012</b> | 1.190          | 0.275 | 3.217               | <i>0.073</i> | 2.454          | 0.117        | 0.712          | 0.399        |
| H                        | 1  | 4.164          | <b>0.041</b> | 20.262                   | <b>&lt;0.001</b> |                |              |                |       | 3.354               | <i>0.067</i> |                |              |                |              |
| E                        | 1  | 0.002          | 0.966        | 0.023                    | 0.879            | 7.470          | <b>0.006</b> | 0.011          | 0.916 | 7.047               | <b>0.008</b> | 1.400          | 0.237        | 5.919          | <b>0.015</b> |
| H:E                      | 1  | 2.055          | 0.152        | 0.015                    | 0.903            |                |              |                |       | 1.738               | 0.187        |                |              |                |              |
| H:P                      | 1  | 1.481          | 0.224        | 5.626                    | <b>0.018</b>     |                |              |                |       | 0.015               | 0.902        |                |              |                |              |
| E:P                      | 1  | 0.560          | 0.454        | 1.918                    | 0.166            | 0.354          | 0.552        | 2.080          | 0.149 | 0.485               | 0.486        | 0.742          | 0.389        | 0.100          | 0.752        |
| H:E:P                    | 1  | 0.535          | 0.465        | 1.229                    | 0.268            |                |              |                |       | 0.320               | 0.572        |                |              |                |              |
| N                        |    | 159            |              | 159                      |                  | 72             |              | 87             |       | 159                 |              | 72             |              | 87             |              |

**Table S2: Functions and primers for the 28 genes used in this study.**

| Gene                   | Putative gene function                                                                     | ENSEMBL transcript ID | Forward / Reverse Primers                                    | Amplicon size | Reference  |
|------------------------|--------------------------------------------------------------------------------------------|-----------------------|--------------------------------------------------------------|---------------|------------|
| ubc                    | Ubiquitin, basic cell metabolism                                                           | ENSGACT00000010662    | <b>AGACGGGCATAGCACTTGC</b><br>CAGGACAAGGAAGGCATCC            | 218           | [7]        |
| rpl13a                 | Ribosomal protein L13a, basic cell metabolism                                              | ENSGACT00000012319    | <b>CACCTTGGTCAACTTGAACAGTG</b><br>TCCCTCCGCCCTACGAC          | 218           | [7]        |
| b2m                    | Beta-2 microglobulin, serum protein associated with MHCII, expressed on all cells          | ENSGACT00000025537    | <b>GAAGATGTGTTGAATAGAAGCTGG</b><br>AGACTATGCCTGGGAATCAAAC    | 226           | [7]        |
| eef1a                  | Eukaryotic Elongation factor 1 alpha, basic cell metabolism                                | ENSGACT00000002833    | <b>CCACCGTTGCCTTTGTCC</b><br>TGGGACTGTTCCAATACCTCC           | unknown       | [7]        |
| <b>Metabolism</b>      |                                                                                            |                       |                                                              |               |            |
| <sup>1</sup> fabp2     | Fatty acid binding protein 2 intestinal, growth factor                                     | ENSGACT00000023459    | <b>CGCCGATGGAACAGAACTATCAGG</b><br>CGGGTTGTCGTGCTGCTTTGCTTTT | 102           | This study |
| <sup>2</sup> gapdh     | glyceraldehyde-3-phosphate dehydrogenase, glycolysis                                       | ENSGACT00000013612    | <b>ACAAGTCCCTCAAGGTCGTCAG</b><br>TGGTGGCATGAACTGTGCTCATC     | 123           | This study |
| <sup>3</sup> acadsb    | acyl-CoA dehydrogenase, short/branched chain, first step in fatty acid metabolism in cells | ENSGACT00000003295    | <b>ACCAGACAGAGAGTGCAGTTTGG</b><br>TTGATGCTGCATGCCCTGGAAG     | 60            | This study |
| <sup>4</sup> rab11a1   | member of RAS oncogene family, angiogenesis, protein transport                             | ENSGACT00000017582    | <b>ATAGTCATCATGCTAGTGGGCAAC</b><br>GAAAGAAAGGCCATGTTTCTCTGC  | 102           | This study |
| <sup>5</sup> ctrc      | chymotrypsin C (caldecrin), proteolysis, cellular calcium ion homeostasis                  | ENSGACT00000008916    | <b>TCATGGGCACCGCTAATATTGTTG</b><br>TGATCAGGGCGATGTCATTACGG   | 75            | This study |
| <b>Stress Response</b> |                                                                                            |                       |                                                              |               |            |
| <sup>6</sup> hsp70     | Heat shock 70kDa protein 8, molecular chaperone                                            | ENSGACT00000013955    | <b>CACCTGGCTTGATGGGAATCAGTC</b><br>TCCTTCTGCTGATGCTCAAACCTCC | 60            | This study |
| <sup>7</sup> hsp90     | Heat shock 90kDa protein alpha, molecular chaperone                                        | ENSGACT00000017081    | <b>TCACCGTCAAAGTGGACAACCTCC</b><br>TCGATCTGGTCTTCTTCAAGTGC   | 79            | This study |
| <sup>8</sup> nr3c1     | Glucocorticoid receptor, initiates stress response upon cortisol binding                   | ENSGACT00000024121    | <b>TCTTCAAGAGAGCAGTGGGAAGGG</b><br>TTCCAGGTTTCATGCCTGCCATC   | 137           | This study |
| <b>Innate Immunity</b> |                                                                                            |                       |                                                              |               |            |
| <sup>9</sup> sod2      | superoxide dismutase 2, superoxide metabolic process,                                      | ENSGACT000000119[7]   | <b>CGTACGTGAACAACCTCAACGTC</b>                               | 73            | This study |

**Table S2** continued

| <b>Gene</b>                    | <b>Putative gene function</b>                                                                                                                   | <b>ENSEMBL transcript ID</b> | <b>Forward / Reverse Primers</b>                                                  | <b>Amplicon size</b> | <b>Reference</b> |
|--------------------------------|-------------------------------------------------------------------------------------------------------------------------------------------------|------------------------------|-----------------------------------------------------------------------------------|----------------------|------------------|
| <sup>10</sup> vegfa            | involved in inflammation processes<br>Vascular endothelial growth factor receptor 2 subtype 1, stimulation of macrophage and monocyte migration | ENSGACT00000018538           | TGAGCGGTCACATCTCCCTTTG<br><b>CGAAGCCATGGAGTGTGTTCC</b><br>AGAAGTCTAAGCCGCGTTACCTG | 69                   | This study       |
| <sup>11</sup> tf               | transferrin-a, antibacterial, cellular iron homeostasis                                                                                         | ENSGACT00000017999           | <b>ATGCTTCTTGTACCTGGCCATC</b><br>TTGCTGGAACCTAATCTGGTCTGC                         | 115                  | This study       |
| <sup>12</sup> sla1             | Src-like-adaptor, regulates GM-CSFR signaling and monocytic dendritic cell maturation                                                           | ENSGACT00000007895           | <b>ACAGAGTCGGCTCCTTCATGATAC</b><br>TCACAGAGAGCGAATACAGACCTC                       | 66                   | This study       |
| <sup>13</sup> ogfr             | opioid growth factor receptor, immunocytochemistry, tissue renewal, wound healing                                                               | ENSGACT00000020054           | <b>TGAAACGAGCAGACAATTGGAAGG</b><br>GCAGGTTGTTGTGCATGTTCCG                         | 66                   | This study       |
| <sup>14</sup> tlr2             | toll-like receptor 2, antigen recognition                                                                                                       | ENSGACT00000024730           | <b>CGGAAGGTGATTTTCCTGACC</b><br>CTGACCAGGTACGAAGCCG                               | 230                  | Sascha Hibbeler, |
| <sup>15</sup> f2               | coagulation factor II (thrombin), involved in thrombotic response                                                                               | ENSGACT00000020418           | <b>ACCTTTGGAGAAGGAGAGAGTGTG</b><br>CGACGATGCGTTCCTGTCTGTATG                       | 115                  | This study       |
| <b>Innate Humoral Immunity</b> |                                                                                                                                                 |                              |                                                                                   |                      |                  |
| <sup>16</sup> saal1            | Serum amyloid A, acute phase protein                                                                                                            | ENSGACT00000007599           | <b>TCGCAGTGAGGCCAAAGATGAG</b><br>AAATCTGCCACCGTGTCCCTTGG                          | 134                  | This study       |
| <sup>17</sup> socs1            | suppressor of cytokine signaling 1, negative immune regulation                                                                                  | ENSGACT00000018981           | <b>ACTGCAGTGAGAACTAAACGGATG</b><br>ATGATGATGACGACGACGACAAGG                       | 138                  | This study       |
| <b>Innate Immune Signaling</b> |                                                                                                                                                 |                              |                                                                                   |                      |                  |
| <sup>18</sup> cd97             | cell surface protein, leucocyte recruitment                                                                                                     | ENSGACT00000024871           | <b>CTCGTGGCACTCTACGACATGAAG</b><br>CAGCCCTATCTTGGTGACCAGTTG                       | 60                   | This study       |
| <sup>19</sup> mif              | macrophage migration inhibitory factor, inflammatory cytokine                                                                                   | ENSGACT00000023656           | <b>ATCAGCGGAGCTCACAACAAGC</b><br>TCAGGAGAGATGCTCAGGTGTTTG                         | 77                   | This study       |
| <sup>20</sup> il1b             | interleukin 1 B, inflammation signaling                                                                                                         | ENSGACT00000019325           | <b>TGACGATGAAGCAGGTGGTCAAC</b><br>ACAGCGTCACGATCTCCTCTTC                          | 150                  | This study       |
| <sup>21</sup> tgfb1            | transforming growth factor beta 1, cytokine, antiinflammatory                                                                                   | ENSGACT00000016962           | <b>GGTGGTTGCTTTGTCTCAT</b><br>TGTCTTCGACGTCAGTCTGAG                               | 190                  | Marc Ritter,     |
| <sup>22</sup> tnfa             | tumor necrosis factor a, cytokine activity                                                                                                      | ENSGACT00000013402           | <b>AACTACTACAGAGCCAAGGGCAAG</b><br>ACGGCACTCAGCGGTACAATTC                         | 60                   | This study       |

**Table S2** continued

| <b>Gene</b>              | <b>Putative gene function</b>                                                           | <b>ENSEMBL transcript ID</b>                                     | <b>Forward / Reverse Primers</b>                          | <b>Amplicon size</b> | <b>Reference</b> |
|--------------------------|-----------------------------------------------------------------------------------------|------------------------------------------------------------------|-----------------------------------------------------------|----------------------|------------------|
| <b>Complement System</b> |                                                                                         |                                                                  |                                                           |                      |                  |
| <sup>23</sup> c7         | bridge btw adaptive and innate immune system                                            | ENSGACT00000009181                                               | <b>TGGCTCAAGCTCAGCACAAACAG</b><br>AGCGACACGTGTTTGTGGATCG  | 79                   | This study       |
| <sup>24</sup> c9         | bridge btw adaptive and innate immune system                                            | ENSGACT00000020968                                               | <b>CCGTGACGAACAAAGACTCAGTTG</b><br>TCTGACCGATGTCAGCACCTTG | 71                   | This study       |
| <b>Adaptive Immunity</b> |                                                                                         |                                                                  |                                                           |                      |                  |
| <sup>25</sup> ighm       | immunoglobulin heavy constant mu (ighm), antibody molecule, activates complement system | ENSGACT00000016907,<br>ENSGACT00000016927,<br>ENSGACT00000016947 | <b>AAGGCAGGAGAATGAAACCTTGG</b><br>CCGAGTGAGCAGACAGGGACTGG | 175                  | Sascha Hibbeler, |
| <sup>26</sup> ly75       | Lymphocyte antigen 75, reduces B lymphocyte proliferation                               | ENSGACT00000020067                                               | <b>TTGTCTGCACAACCGAAGCAAAG</b><br>AGGAAGACCACGACGAAGAGAC  | 70                   | This study       |
| <sup>27</sup> il16       | interleukin 16, T cell activation and proliferation                                     | ENSGACT00000016499                                               | <b>CTGGTCTGGGCTTCAGTATTGC</b><br>CTGGGAAACACTCTGTGGACTG   | 76                   | This study       |
| <sup>28</sup> mhcll      | Major histocompatibility complex, pathogen recognition                                  | many                                                             | <b>GTCTTTAACTCCACGGAGCTGAAGG</b><br>ACTCACCGGACTTAGTCAG   | variable             | [8]              |

**Table S3a: Multivariate perMANOVAs testing the effects of experimental treatments on gene expression profiles of adult fish in phase 1.** We tested the effects on each functional gene group (e.g. stress response, metabolism genes, etc). Tests were performed including both host ecotypes (Both) and splitting them by host ecotype (lake and stream). Treatments correspond to the effects of host (H), environment (E), parasite exposure (P), and their interactions (e.g. HxE). Significant P values are highlighted in bold.

| Treatment                       | DF | Both   |                |              | Lake |        |                | Stream |    |        |                |       |
|---------------------------------|----|--------|----------------|--------------|------|--------|----------------|--------|----|--------|----------------|-------|
|                                 |    | F      | R <sup>2</sup> | P            | DF   | F      | R <sup>2</sup> | P      | DF | F      | R <sup>2</sup> | P     |
| <b>All genes</b>                |    |        |                |              |      |        |                |        |    |        |                |       |
| P                               | 1  | -0.111 | -0.003         | 0.771        | 1    | 0.585  | 0.042          | 0.407  | 1  | 2.6    | 0.134          | 0.083 |
| H                               | 1  | 9.136  | 0.22           | <b>0.002</b> |      |        |                |        |    |        |                |       |
| E                               | 1  | 0.365  | 0.009          | 0.514        | 1    | -0.753 | -0.054         | 0.992  | 1  | 0.883  | 0.046          | 0.406 |
| H:P                             | 1  | 2.758  | 0.066          | 0.061        |      |        |                |        |    |        |                |       |
| P:E                             | 1  | -0.18  | -0.004         | 0.822        | 1    | 0.156  | 0.011          | 0.632  | 1  | -0.149 | -0.008         | 0.874 |
| H:E                             | 1  | -0.722 | -0.017         | 0.952        |      |        |                |        |    |        |                |       |
| H:P:E                           | 1  | 0.279  | 0.007          | 0.574        |      |        |                |        |    |        |                |       |
| Residuals                       | 30 |        | 0.722          |              | 14   |        | 1.001          |        | 16 |        | 0.828          |       |
| Total                           | 37 |        | 1              |              | 17   |        | 1              |        | 19 |        | 1              |       |
| <b>Stress response genes</b>    |    |        |                |              |      |        |                |        |    |        |                |       |
| P                               | 1  | 1.168  | 0.031          | 0.238        | 1    | -0.036 | -0.003         | 0.572  | 1  | 4.788  | 0.238          | 0.083 |
| H                               | 1  | 7.131  | 0.186          | <b>0.026</b> |      |        |                |        |    |        |                |       |
| E                               | 1  | 0.458  | 0.012          | 0.408        | 1    | -0.951 | -0.071         | 0.942  | 1  | -0.188 | -0.009         | 0.649 |
| H:P                             | 1  | 1.252  | 0.033          | 0.23         |      |        |                |        |    |        |                |       |
| P:E                             | 1  | 0.002  | 0              | 0.594        | 1    | 0.349  | 0.026          | 0.306  | 1  | -0.471 | -0.023         | 0.851 |
| H:E                             | 1  | -2.032 | -0.053         | 0.981        |      |        |                |        |    |        |                |       |
| H:P:E                           | 1  | 0.296  | 0.008          | 0.457        |      |        |                |        |    |        |                |       |
| Residuals                       | 30 |        | 0.784          |              | 14   |        | 1.048          |        | 16 |        | 0.795          |       |
| Total                           | 37 |        | 1              |              | 17   |        | 1              |        | 19 |        | 1              |       |
| <b>Metabolism genes</b>         |    |        |                |              |      |        |                |        |    |        |                |       |
| P                               | 1  | -2.013 | -0.075         | 0.94         | 1    | -0.473 | -0.038         | 0.765  | 1  | -1.526 | -0.098         | 0.911 |
| H                               | 1  | 0.141  | 0.005          | 0.538        |      |        |                |        |    |        |                |       |
| E                               | 1  | -0.922 | -0.034         | 0.76         | 1    | -1.68  | -0.137         | 0.952  | 1  | 1.329  | 0.085          | 0.343 |
| H:P                             | 1  | 0.709  | 0.026          | 0.431        |      |        |                |        |    |        |                |       |
| P:E                             | 1  | 0.435  | 0.016          | 0.479        | 1    | 0.451  | 0.037          | 0.537  | 1  | -0.156 | -0.01          | 0.594 |
| H:E                             | 1  | -1.717 | -0.064         | 0.896        |      |        |                |        |    |        |                |       |
| H:P:E                           | 1  | 0.334  | 0.012          | 0.494        |      |        |                |        |    |        |                |       |
| Residuals                       | 30 |        | 1.113          |              | 14   |        | 1.138          |        | 16 |        | 1.023          |       |
| Total                           | 37 |        | 1              |              | 17   |        | 1              |        | 19 |        | 1              |       |
| <b>Innate cellular immunity</b> |    |        |                |              |      |        |                |        |    |        |                |       |
| P                               | 1  | -4.685 | -0.08          | 0.997        | 1    | 2.912  | 0.174          | 0.173  | 1  | 1.149  | 0.056          | 0.334 |
| H                               | 1  | 20.498 | 0.352          | <b>0.002</b> |      |        |                |        |    |        |                |       |
| E                               | 1  | 1.661  | 0.029          | 0.232        | 1    | -0.54  | -0.032         | 0.85   | 1  | 3.766  | 0.185          | 0.119 |
| H:P                             | 1  | 7.744  | 0.133          | <b>0.03</b>  |      |        |                |        |    |        |                |       |
| P:E                             | 1  | 0.62   | 0.011          | 0.423        | 1    | 0.394  | 0.023          | 0.494  | 1  | -0.535 | -0.026         | 0.739 |

Table S3a continued

| Treatment                      | DF | Both   |                |              | DF | Lake   |                |       | DF | Stream |                |              |
|--------------------------------|----|--------|----------------|--------------|----|--------|----------------|-------|----|--------|----------------|--------------|
|                                |    | F      | R <sup>2</sup> | P            |    | F      | R <sup>2</sup> | P     |    | F      | R <sup>2</sup> | P            |
| H:E                            | 1  | 3.579  | 0.061          | 0.11         |    |        |                |       |    |        |                |              |
| H:P:E                          | 1  | -1.214 | -0.021         | 0.928        |    |        |                |       |    |        |                |              |
| Residuals                      | 30 |        | 0.515          |              | 14 |        | 0.835          |       | 16 |        | 0.785          |              |
| Total                          | 37 |        | 1              |              | 17 |        | 1              |       | 19 |        | 1              |              |
| <b>Innate humoral immunity</b> |    |        |                |              |    |        |                |       |    |        |                |              |
| P                              | 1  | -0.346 | -0.012         | 0.689        | 1  | -0.397 | -0.029         | 0.817 | 1  | -0.063 | -0.004         | 0.64         |
| H                              | 1  | 0.518  | 0.018          | 0.371        |    |        |                |       |    |        |                |              |
| H                              | 1  | 15.705 | 0.33           | <b>0.001</b> |    |        |                |       |    |        |                |              |
| E                              | 1  | 2.214  | 0.076          | 0.105        | 1  | 0.417  | 0.031          | 0.394 | 1  | 1.114  | 0.074          | 0.26         |
| H:P                            | 1  | -0.074 | -0.003         | 0.555        |    |        |                |       |    |        |                |              |
| P:E                            | 1  | -0.395 | -0.014         | 0.675        | 1  | -0.56  | -0.042         | 0.942 | 1  | -2.044 | -0.136         | 0.987        |
| H:E                            | 1  | -0.619 | -0.021         | 0.757        |    |        |                |       |    |        |                |              |
| H:P:E                          | 1  | -2.348 | -0.081         | 0.988        |    |        |                |       |    |        |                |              |
| Residuals                      | 30 |        | 1.036          |              | 14 |        | 1.04           |       | 16 |        | 1.066          |              |
| Total                          | 37 |        | 1              |              | 17 |        | 1              |       | 19 |        | 1              |              |
| <b>Innate immune signaling</b> |    |        |                |              |    |        |                |       |    |        |                |              |
| P                              | 1  | 0.602  | 0.013          | 0.379        | 1  | 0.52   | 0.035          | 0.392 | 1  | -0.922 | -0.055         | 0.825        |
| E                              | 1  | 0.063  | 0.001          | 0.528        | 1  | 0.239  | 0.016          | 0.508 | 1  | -0.542 | -0.032         | 0.758        |
| H:P                            | 1  | -0.249 | -0.005         | 0.635        |    |        |                |       |    |        |                |              |
| P:E                            | 1  | 1.635  | 0.034          | 0.229        | 1  | 0.205  | 0.014          | 0.52  | 1  | 2.293  | 0.136          | 0.152        |
| H:E                            | 1  | 0.041  | 0.001          | 0.548        |    |        |                |       |    |        |                |              |
| H:P:E                          | 1  | -0.163 | -0.003         | 0.61         |    |        |                |       |    |        |                |              |
| Residuals                      | 30 |        | 0.63           |              | 14 |        | 0.936          |       | 16 |        | 0.951          |              |
| Total                          | 37 |        | 1              |              | 17 |        | 1              |       | 19 |        | 1              |              |
| <b>Complement system</b>       |    |        |                |              |    |        |                |       |    |        |                |              |
| P                              | 1  | -3.343 | -0.053         | 0.952        | 1  | 8.027  | 0.329          | 0.111 | 1  | 9.339  | 0.385          | <b>0.024</b> |
| H                              | 1  | 14.765 | 0.234          | <b>0.009</b> |    |        |                |       |    |        |                |              |
| E                              | 1  | 3.602  | 0.057          | 0.158        | 1  | 2.145  | 0.088          | 0.39  | 1  | 0.944  | 0.039          | 0.46         |
| H:P                            | 1  | 20.716 | 0.328          | <b>0.003</b> |    |        |                |       |    |        |                |              |
| P:E                            | 1  | -1.655 | -0.026         | 0.835        | 1  | 0.194  | 0.008          | 0.527 | 1  | -2.054 | -0.085         | 0.89         |
| H:E                            | 1  | -0.571 | -0.009         | 0.596        |    |        |                |       |    |        |                |              |
| H:P:E                          | 1  | -0.293 | -0.005         | 0.594        |    |        |                |       |    |        |                |              |
| Residuals                      | 30 |        | 0.475          |              | 14 |        | 0.575          |       | 16 |        | 0.66           |              |
| Total                          | 37 |        | 1              |              | 17 |        | 1              |       | 19 |        | 1              |              |
| <b>Adaptive immunity</b>       |    |        |                |              |    |        |                |       |    |        |                |              |
| P                              | 1  | 3.669  | 0.073          | 0.127        | 1  | -0.35  | -0.02          | 0.802 | 1  | 15.456 | 0.502          | <b>0.004</b> |
| H                              | 1  | 7.102  | 0.141          | <b>0.033</b> |    |        |                |       |    |        |                |              |
| E                              | 1  | 3.157  | 0.063          | 0.179        | 1  | 2.149  | 0.123          | 0.263 | 1  | -1.207 | -0.039         | 0.952        |
| H:P                            | 1  | 3.854  | 0.077          | 0.126        |    |        |                |       |    |        |                |              |
| P:E                            | 1  | 1.108  | 0.022          | 0.36         | 1  | 1.718  | 0.098          | 0.303 | 1  | 0.535  | 0.017          | 0.446        |



**Table S3a** continued

| Treatment | DF | Both   |                |       | DF | Lake |                |   | DF | Stream |                |   |
|-----------|----|--------|----------------|-------|----|------|----------------|---|----|--------|----------------|---|
|           |    | F      | R <sup>2</sup> | P     |    | F    | R <sup>2</sup> | P |    | F      | R <sup>2</sup> | P |
| H:E       | 1  | -0.463 | -0.009         | 0.754 |    |      |                |   |    |        |                |   |
| H:P:E     | 1  | 1.829  | 0.036          | 0.277 |    |      |                |   |    |        |                |   |
| Residuals | 30 |        | 0.597          |       | 14 |      | 0.799          |   | 16 |        | 0.52           |   |
| Total     | 37 |        | 1              |       | 17 |      | 1              |   | 19 |        | 1              |   |

**Table S3b: Univariate LMMs testing the effects of experimental treatments on each gene.** Tests were performed including both host ecotypes (Both) and splitting them by host ecotype (lake and stream). Treatments correspond to the effects of host (H), environment (E), parasite exposure (P), and their interactions (e.g. HxE). P-values lower than 0.05 are highlighted in bold and significant P-values after FDR correction according to Benjamini-Yekutieli are marked with \*.

| Treatment      | Both   |    |         |                   | Lake  |    |         |       | Stream |    |         |       |
|----------------|--------|----|---------|-------------------|-------|----|---------|-------|--------|----|---------|-------|
|                | F      | Df | Df.res  | P                 | F     | Df | Df.res  | P     | F      | Df | Df.res  | P     |
| <b>fabp2</b>   |        |    |         |                   |       |    |         |       |        |    |         |       |
| P              | 0.051  | 1  | 451.062 | 0.822             | 0.098 | 1  | 127.668 | 0.754 | 0.513  | 1  | 197.800 | 0.475 |
| H              | 15.025 | 1  | 473.507 | <b>&lt;0.001</b>  |       |    |         |       |        |    |         |       |
| E              | 2.018  | 1  | 486.412 | 0.156             | 0.631 | 1  | 130.191 | 0.428 | 0.498  | 1  | 212.972 | 0.481 |
| P:H            | 0.514  | 1  | 465.191 | 0.474             |       |    |         |       |        |    |         |       |
| P:E            | 1.253  | 1  | 464.094 | 0.264             | 2.040 | 1  | 125.529 | 0.156 | 0.053  | 1  | 203.020 | 0.818 |
| H:E            | 0.004  | 1  | 468.787 | 0.950             |       |    |         |       |        |    |         |       |
| P:H:E          | 1.092  | 1  | 457.281 | 0.297             |       |    |         |       |        |    |         |       |
| lambda         |        |    |         |                   |       |    |         |       | -0.411 |    |         |       |
| <b>gapdh</b>   |        |    |         |                   |       |    |         |       |        |    |         |       |
| P              | 0.874  | 1  | 687.545 | 0.350             | 2.500 | 1  | 263.066 | 0.115 | 0.018  | 1  | 258.453 | 0.893 |
| H              | 0.443  | 1  | 714.801 | 0.506             |       |    |         |       |        |    |         |       |
| E              | 1.670  | 1  | 726.639 | 0.197             | 3.233 | 1  | 269.858 | 0.073 | 0.165  | 1  | 273.321 | 0.685 |
| H:E            | 3.375  | 1  | 700.484 | 0.067             |       |    |         |       |        |    |         |       |
| P:H            | 0.545  | 1  | 697.017 | 0.461             |       |    |         |       |        |    |         |       |
| P:E            | 2.100  | 1  | 701.805 | 0.148             | 1.752 | 1  | 258.509 | 0.187 | 0.560  | 1  | 264.089 | 0.455 |
| P:H:E          | 0.202  | 1  | 688.199 | 0.653             |       |    |         |       |        |    |         |       |
| lambda         | 2.612  |    |         |                   |       |    |         |       | 3.031  |    |         |       |
| <b>acadsb</b>  |        |    |         |                   |       |    |         |       |        |    |         |       |
| P              | 0.357  | 1  | 271.766 | 0.551             | 0.015 | 1  | 186.303 | 0.903 | 0.387  | 1  | 118.822 | 0.535 |
| H              | 13.500 | 1  | 283.514 | <b>&lt; 0.001</b> |       |    |         |       |        |    |         |       |
| E              | 0.608  | 1  | 282.652 | 0.436             | 0.293 | 1  | 190.820 | 0.589 | 0.273  | 1  | 125.783 | 0.602 |
| P:H            | 0.141  | 1  | 281.681 | 0.707             |       |    |         |       |        |    |         |       |
| H:E            | 0.009  | 1  | 285.905 | 0.927             |       |    |         |       |        |    |         |       |
| P:E            | 0.787  | 1  | 278.108 | 0.376             | 3.054 | 1  | 183.452 | 0.082 | 0.012  | 1  | 121.944 | 0.913 |
| P:H:E          | 1.174  | 1  | 279.484 | 0.279             |       |    |         |       |        |    |         |       |
| lambda         |        |    |         |                   |       |    |         |       |        |    |         |       |
| <b>rab11a1</b> |        |    |         |                   |       |    |         |       |        |    |         |       |
| P              | 0.597  | 1  | 339.472 | 0.440             | 0.207 | 1  | 353.980 | 0.650 | 0.360  | 1  | 85.992  | 0.550 |
| H              | 22.718 | 1  | 354.017 | <b>&lt; 0.001</b> |       |    |         |       |        |    |         |       |
| E              | 1.022  | 1  | 354.471 | 0.313             | 2.618 | 1  | 361.037 | 0.107 | 0.000  | 1  | 90.499  | 0.984 |
| H:E            | 1.023  | 1  | 356.352 | 0.313             |       |    |         |       |        |    |         |       |
| P:H            | 0.036  | 1  | 350.923 | 0.850             |       |    |         |       |        |    |         |       |
| P:E            | 0.010  | 1  | 347.549 | 0.922             | 1.311 | 1  | 350.935 | 0.253 | 0.458  | 1  | 88.081  | 0.500 |
| P:H:E          | 1.581  | 1  | 347.992 | 0.209             |       |    |         |       |        |    |         |       |
| lambda         |        |    |         |                   |       |    |         |       |        |    |         |       |

Table S3b: Continued

| Treatment    | Both   |    |         |               | Lake   |    |         |               | Stream |    |         |              |
|--------------|--------|----|---------|---------------|--------|----|---------|---------------|--------|----|---------|--------------|
|              | F      | Df | Df.res  | P             | F      | Df | Df.res  | P             | F      | Df | Df.res  | P            |
| <b>ctrc</b>  |        |    |         |               |        |    |         |               |        |    |         |              |
| P            | 0.006  | 1  | 524.456 | 0.939         | 0.084  | 1  | 129.995 | 0.773         | 0.028  | 1  | 259.353 | 0.867        |
| H            | 0.843  | 1  | 544.458 | 0.359         |        |    |         |               |        |    |         |              |
| E            | 0.343  | 1  | 549.908 | 0.559         | 0.016  | 1  | 132.244 | 0.900         | 0.247  | 1  | 276.352 | 0.619        |
| H:E          | 0.000  | 1  | 543.735 | 0.988         |        |    |         |               |        |    |         |              |
| P:H          | 0.032  | 1  | 536.615 | 0.859         |        |    |         |               |        |    |         |              |
| P:E          | 3.254  | 1  | 536.454 | 0.072         | 2.582  | 1  | 128.987 | 0.111         | 0.352  | 1  | 265.825 | 0.554        |
| P:H:E        | 1.137  | 1  | 531.672 | 0.287         |        |    |         |               |        |    |         |              |
| lambda       | 1.321  |    |         |               |        |    |         |               | 1.484  |    |         |              |
| <b>hsp70</b> |        |    |         |               |        |    |         |               |        |    |         |              |
| P            | 2.104  | 1  | 69.265  | 0.151         | 0.310  | 1  | 26.062  | 0.582         | 4.523  | 1  | 35.389  | <b>0.040</b> |
| H            | 8.879  | 1  | 71.048  | <b>0.004</b>  |        |    |         |               |        |    |         |              |
| E            | 0.411  | 1  | 70.230  | 0.523         | 0.492  | 1  | 25.313  | 0.489         | 0.209  | 1  | 36.821  | 0.651        |
| P:H          | 3.065  | 1  | 71.758  | 0.084         |        |    |         |               |        |    |         |              |
| P:E          | 1.340  | 1  | 70.131  | 0.251         | 1.529  | 1  | 25.489  | 0.228         | 0.286  | 1  | 36.011  | 0.596        |
| H:E          | 0.013  | 1  | 71.954  | 0.908         |        |    |         |               |        |    |         |              |
| P:H:E        | 0.201  | 1  | 71.050  | 0.656         |        |    |         |               |        |    |         |              |
| lambda       | 1.414  |    |         |               |        |    |         |               | 1.488  |    |         |              |
| <b>hsp90</b> |        |    |         |               |        |    |         |               |        |    |         |              |
| P            | 1.694  | 1  | 64.255  | 0.198         | 0.623  | 1  | 28.663  | 0.437         | 3.836  | 1  | 28.303  | 0.060        |
| H            | 7.682  | 1  | 65.775  | <b>0.007</b>  |        |    |         |               |        |    |         |              |
| E            | 0.413  | 1  | 64.944  | 0.523         | 0.172  | 1  | 27.884  | 0.682         | 0.290  | 1  | 29.094  | 0.595        |
| H:E          | 0.010  | 1  | 66.609  | 0.919         |        |    |         |               |        |    |         |              |
| P:H          | 3.392  | 1  | 66.466  | 0.070         |        |    |         |               |        |    |         |              |
| P:E          | 0.739  | 1  | 64.974  | 0.393         | 2.259  | 1  | 27.930  | 0.144         | 0.000  | 1  | 28.657  | 0.997        |
| P:H:E        | 0.871  | 1  | 65.842  | 0.354         |        |    |         |               |        |    |         |              |
| lambda       | 1.134  |    |         |               |        |    |         |               | 1.055  |    |         |              |
| <b>nr3c1</b> |        |    |         |               |        |    |         |               |        |    |         |              |
| P            | 1.329  | 1  | 673.638 | 0.249         | 1.550  | 1  | 353.028 | 0.214         | 0.554  | 1  | 188.529 | 0.458        |
| H            | 5.463  | 1  | 696.482 | <b>0.020</b>  |        |    |         |               |        |    |         |              |
| E            | 0.666  | 1  | 705.227 | 0.415         | 3.816  | 1  | 360.038 | 0.052         | 0.173  | 1  | 200.295 | 0.678        |
| H:E          | 2.900  | 1  | 688.992 | 0.089         |        |    |         |               |        |    |         |              |
| P:H          | 0.005  | 1  | 682.619 | 0.944         |        |    |         |               |        |    |         |              |
| P:E          | 1.433  | 1  | 687.499 | 0.232         | 9.628  | 1  | 349.871 | <b>0.002*</b> | 0.877  | 1  | 193.233 | 0.350        |
| P:H:E        | 7.557  | 1  | 676.061 | <b>0.006*</b> |        |    |         |               |        |    |         |              |
| lambda       | -1.457 |    |         |               | -4.058 |    |         |               | -0.394 |    |         |              |
| <b>sod2</b>  |        |    |         |               |        |    |         |               |        |    |         |              |
| P            | 0.026  | 1  | 321.077 | 0.873         | 0.048  | 1  | 265.735 | 0.827         | 0.276  | 1  | 64.343  | 0.601        |
| H            | 10.369 | 1  | 336.314 | <b>0.001</b>  |        |    |         |               |        |    |         |              |
| E            | 2.551  | 1  | 340.225 | 0.111         | 2.708  | 1  | 271.783 | 0.101         | 0.351  | 1  | 68.147  | 0.556        |

**Table S3b: Continued**

| Treatment    | Both   |    |         |              | Lake   |    |         |               | Stream |    |         |       |
|--------------|--------|----|---------|--------------|--------|----|---------|---------------|--------|----|---------|-------|
|              | F      | Df | Df.res  | P            | F      | Df | Df.res  | P             | F      | Df | Df.res  | P     |
| H:E          | 0.568  | 1  | 336.079 | 0.451        |        |    |         |               |        |    |         |       |
| P:H          | 0.512  | 1  | 332.655 | 0.475        |        |    |         |               |        |    |         |       |
| P:E          | 1.948  | 1  | 329.288 | 0.164        | 3.334  | 1  | 263.472 | 0.069         | 0.058  | 1  | 66.001  | 0.810 |
| P:H:E        | 1.097  | 1  | 328.118 | 0.296        |        |    |         |               |        |    |         |       |
| lambda       |        |    |         |              |        |    |         |               |        |    |         |       |
| <b>vegfa</b> |        |    |         |              |        |    |         |               |        |    |         |       |
| P            | 0.983  | 1  | 366.714 | 0.322        | 0.013  | 1  | 290.038 | 0.910         | 1.324  | 1  | 153.220 | 0.252 |
| H            | 16.705 | 1  | 382.812 | <0.001       |        |    |         |               |        |    |         |       |
| E            | 1.716  | 1  | 384.893 | 0.191        | 1.746  | 1  | 297.119 | 0.187         | 0.526  | 1  | 162.781 | 0.469 |
| H:E          | 0.392  | 1  | 383.386 | 0.532        |        |    |         |               |        |    |         |       |
| P:H          | 0.785  | 1  | 378.528 | 0.376        |        |    |         |               |        |    |         |       |
| P:E          | 0.472  | 1  | 375.372 | 0.492        | 3.974  | 1  | 285.359 | <b>0.047</b>  | 0.387  | 1  | 157.347 | 0.535 |
| P:H:E        | 2.507  | 1  | 374.685 | 0.114        |        |    |         |               |        |    |         |       |
| lambda       | -1.535 |    |         |              |        |    |         |               |        |    |         |       |
| <b>tf</b>    |        |    |         |              |        |    |         |               |        |    |         |       |
| P            | 3.233  | 1  | 702.358 | 0.073        | 7.004  | 1  | 372.070 | <b>0.008*</b> | 0.012  | 1  | 240.583 | 0.915 |
| H            | 0.052  | 1  | 723.632 | 0.820        |        |    |         |               |        |    |         |       |
| E            | 0.685  | 1  | 735.580 | 0.408        | 0.726  | 1  | 381.215 | 0.395         | 3.634  | 1  | 255.335 | 0.058 |
| H:E          | 4.677  | 1  | 719.137 | <b>0.031</b> |        |    |         |               |        |    |         |       |
| P:H          | 3.092  | 1  | 710.624 | 0.079        |        |    |         |               |        |    |         |       |
| P:E          | 2.067  | 1  | 717.846 | 0.151        | 2.585  | 1  | 369.982 | 0.109         | 0.194  | 1  | 246.335 | 0.660 |
| P:H:E        | 0.501  | 1  | 704.017 | 0.479        |        |    |         |               |        |    |         |       |
| lambda       | 3.110  |    |         |              | 3.327  |    |         |               | 2.918  |    |         |       |
| <b>sla1</b>  |        |    |         |              |        |    |         |               |        |    |         |       |
| P            | 0.473  | 1  | 356.204 | 0.492        | 1.816  | 1  | 372.070 | 0.179         | 0.000  | 1  | 58.085  | 0.988 |
| H            | 17.917 | 1  | 371.308 | <0.001       |        |    |         |               |        |    |         |       |
| E            | 0.011  | 1  | 372.087 | 0.916        | 0.415  | 1  | 381.215 | 0.52          | 0.005  | 1  | 60.496  | 0.946 |
| H:E          | 0.035  | 1  | 373.782 | 0.851        |        |    |         |               |        |    |         |       |
| P:H          | 0.599  | 1  | 367.961 | 0.439        |        |    |         |               |        |    |         |       |
| P:E          | 0.049  | 1  | 364.720 | 0.825        | 1.120  | 1  | 369.982 | 0.291         | 1.025  | 1  | 59.244  | 0.316 |
| P:H:E        | 2.587  | 1  | 364.909 | 0.109        |        |    |         |               |        |    |         |       |
| lambda       |        |    |         |              | -1.698 |    |         |               |        |    |         |       |
| <b>ogfr</b>  |        |    |         |              |        |    |         |               |        |    |         |       |
| P            | 0.090  | 1  | 360.366 | 0.765        | 0.013  | 1  | 290.543 | 0.909         | 0.143  | 1  | 97.843  | 0.707 |
| H            | 13.883 | 1  | 375.893 | <0.001       |        |    |         |               |        |    |         |       |
| E            | 1.791  | 1  | 377.150 | 0.182        | 2.430  | 1  | 297.621 | 0.120         | 0.234  | 1  | 103.510 | 0.630 |
| H:E          | 0.298  | 1  | 377.428 | 0.585        |        |    |         |               |        |    |         |       |
| P:H          | 0.094  | 1  | 372.098 | 0.759        |        |    |         |               |        |    |         |       |
| P:E          | 0.084  | 1  | 368.885 | 0.772        | 2.620  | 1  | 289.111 | 0.107         | 0.583  | 1  | 100.391 | 0.447 |
| P:H:E        | 2.503  | 1  | 368.715 | 0.114        |        |    |         |               |        |    |         |       |

**Table S3b: Continued**

| Treatment    | Both   |    |         |              | Lake  |    |         |       | Stream |    |         |       |
|--------------|--------|----|---------|--------------|-------|----|---------|-------|--------|----|---------|-------|
|              | F      | Df | Df.res  | P            | F     | Df | Df.res  | P     | F      | Df | Df.res  | P     |
| lambda       |        |    |         |              |       |    |         |       |        |    |         |       |
| <b>tlr2</b>  |        |    |         |              |       |    |         |       |        |    |         |       |
| P            | 0.031  | 1  | 694.018 | 0.861        | 1.799 | 1  | 343.584 | 0.181 | 1.736  | 1  | 259.353 | 0.189 |
| H            | 18.862 | 1  | 717.673 | <b>0.001</b> |       |    |         |       |        |    |         |       |
| E            | 0.372  | 1  | 726.586 | 0.542        | 1.575 | 1  | 350.844 | 0.210 | 0.347  | 1  | 276.352 | 0.556 |
| P:H          | 2.859  | 1  | 702.345 | 0.091        |       |    |         |       |        |    |         |       |
| P:E          | 0.568  | 1  | 707.861 | 0.451        | 2.314 | 1  | 338.612 | 0.129 | 0.445  | 1  | 265.825 | 0.505 |
| H:E          | 1.913  | 1  | 708.023 | 0.167        |       |    |         |       |        |    |         |       |
| P:H:E        | 2.834  | 1  | 695.395 | 0.093        |       |    |         |       |        |    |         |       |
| lambda       |        |    |         |              |       |    |         |       |        |    |         |       |
| <b>f2</b>    |        |    |         |              |       |    |         |       |        |    |         |       |
| P            | 0.019  | 1  | 703.054 | 0.891        | 0.077 | 1  | 301.646 | 0.781 | 0.221  | 1  | 258.841 | 0.639 |
| H            | 0.792  | 1  | 724.161 | 0.374        |       |    |         |       |        |    |         |       |
| E            | 0.704  | 1  | 736.558 | 0.402        | 0.158 | 1  | 308.487 | 0.691 | 2.090  | 1  | 274.441 | 0.149 |
| H:E          | 2.168  | 1  | 720.092 | 0.141        |       |    |         |       |        |    |         |       |
| P:H          | 0.392  | 1  | 711.340 | 0.531        |       |    |         |       |        |    |         |       |
| P:E          | 1.439  | 1  | 718.713 | 0.231        | 2.247 | 1  | 299.613 | 0.135 | 0.000  | 1  | 264.784 | 0.994 |
| P:H:E        | 1.350  | 1  | 704.705 | 0.246        |       |    |         |       |        |    |         |       |
| lambda       | 3.485  |    |         |              |       |    |         |       | 3.624  |    |         |       |
| <b>saal1</b> |        |    |         |              |       |    |         |       |        |    |         |       |
| P            | 0.050  | 1  | 681.465 | 0.822        | 0.326 | 1  | 343.635 | 0.568 | 0.007  | 1  | 251.122 | 0.934 |
| H            | 2.117  | 1  | 716.539 | 0.146        |       |    |         |       |        |    |         |       |
| E            | 0.093  | 1  | 746.100 | 0.760        | 0.005 | 1  | 356.425 | 0.945 | 0.001  | 1  | 274.988 | 0.979 |
| H:E          | 0.019  | 1  | 698.551 | 0.889        |       |    |         |       |        |    |         |       |
| P:H          | 0.143  | 1  | 695.739 | 0.705        |       |    |         |       |        |    |         |       |
| P:E          | 0.050  | 1  | 703.432 | 0.823        | 0.268 | 1  | 331.786 | 0.605 | 0.132  | 1  | 257.314 | 0.717 |
| P:H:E        | 0.455  | 1  | 682.326 | 0.500        |       |    |         |       |        |    |         |       |
| lambda       | 0.526  |    |         |              | 2.316 |    |         |       |        |    |         |       |
| <b>socs1</b> |        |    |         |              |       |    |         |       |        |    |         |       |
| P            | 3.167  | 1  | 555.467 | 0.076        | 1.629 | 1  | 346.213 | 0.203 | 1.206  | 1  | 208.693 | 0.273 |
| H            | 0.546  | 1  | 577.258 | 0.460        |       |    |         |       |        |    |         |       |
| E            | 0.024  | 1  | 583.854 | 0.877        | 0.021 | 1  | 353.216 | 0.885 | 0.387  | 1  | 221.240 | 0.535 |
| H:E          | 0.576  | 1  | 572.820 | 0.448        |       |    |         |       |        |    |         |       |
| P:H          | 0.067  | 1  | 567.143 | 0.796        |       |    |         |       |        |    |         |       |
| P:E          | 1.299  | 1  | 567.592 | 0.255        | 2.664 | 1  | 341.933 | 0.104 | 0.023  | 1  | 213.682 | 0.879 |
| P:H:E        | 1.886  | 1  | 561.245 | 0.170        |       |    |         |       |        |    |         |       |
| lambda       |        |    |         |              |       |    |         |       |        |    |         |       |
| <b>cd97</b>  |        |    |         |              |       |    |         |       |        |    |         |       |
| P            | 0.267  | 1  | 459.328 | 0.606        | 0.457 | 1  | 205.687 | 0.500 | 0.000  | 1  | 259.353 | 0.993 |

**Table S3b: Continued**

| Treatment    | Both   |    |         |         | Lake   |    |         |       | Stream |    |         |       |
|--------------|--------|----|---------|---------|--------|----|---------|-------|--------|----|---------|-------|
|              | F      | Df | Df.res  | P       | F      | Df | Df.res  | P     | F      | Df | Df.res  | P     |
| H            | 14.551 | 1  | 477.443 | <0.001  |        |    |         |       |        |    |         |       |
| E            | 0.016  | 1  | 481.175 | 0.900   | 1.266  | 1  | 210.511 | 0.262 | 2.260  | 1  | 276.352 | 0.134 |
| H:E          | 3.589  | 1  | 479.419 | 0.059   |        |    |         |       |        |    |         |       |
| P:H          | 0.199  | 1  | 471.996 | 0.655   |        |    |         |       |        |    |         |       |
| P:E          | 0.297  | 1  | 470.330 | 0.586   | 2.129  | 1  | 203.225 | 0.146 | 0.946  | 1  | 265.825 | 0.331 |
| P:H:E        | 3.431  | 1  | 467.899 | 0.065   |        |    |         |       |        |    |         |       |
| lambda       | -1.086 |    |         |         |        |    |         |       | -0.916 |    |         |       |
| <b>mif</b>   |        |    |         |         |        |    |         |       |        |    |         |       |
| P            | 0.014  | 1  | 407.397 | 0.907   | 0.003  | 1  | 177.413 | 0.956 | 0.107  | 1  | 191.038 | 0.744 |
| H            | 2.214  | 1  | 427.017 | 0.137   |        |    |         |       |        |    |         |       |
| E            | 0.675  | 1  | 435.445 | 0.412   | 0.557  | 1  | 181.662 | 0.456 | 0.053  | 1  | 204.086 | 0.818 |
| H:E          | 0.299  | 1  | 424.260 | 0.585   |        |    |         |       |        |    |         |       |
| P:H          | 0.119  | 1  | 420.559 | 0.730   |        |    |         |       |        |    |         |       |
| P:E          | 0.191  | 1  | 418.287 | 0.662   | 0.792  | 1  | 174.649 | 0.375 | 3.113  | 1  | 195.905 | 0.079 |
| P:H:E        | 3.969  | 1  | 414.152 | 0.047   |        |    |         |       |        |    |         |       |
| lambda       |        |    |         |         |        |    |         |       |        |    |         |       |
| <b>il1b</b>  |        |    |         |         |        |    |         |       |        |    |         |       |
| P            | 0.688  | 1  | 336.065 | 0.407   | 1.649  | 1  | 145.013 | 0.201 | 0.000  | 1  | 257.743 | 0.995 |
| H            | 10.751 | 1  | 352.552 | < 0.001 |        |    |         |       |        |    |         |       |
| E            | 0.114  | 1  | 358.710 | 0.736   | 0.480  | 1  | 148.925 | 0.490 | 0.030  | 1  | 271.867 | 0.862 |
| H:E          | 0.049  | 1  | 351.635 | 0.825   |        |    |         |       |        |    |         |       |
| P:H          | 0.683  | 1  | 348.336 | 0.409   |        |    |         |       |        |    |         |       |
| P:E          | 0.103  | 1  | 345.239 | 0.748   | 0.000  | 1  | 140.890 | 0.984 | 0.334  | 1  | 262.989 | 0.564 |
| P:H:E        | 0.416  | 1  | 342.961 | 0.519   |        |    |         |       |        |    |         |       |
| lambda       |        |    |         |         |        |    |         |       |        |    |         |       |
| <b>tgfb1</b> |        |    |         |         |        |    |         |       |        |    |         |       |
| P            | 0.222  | 1  | 387.874 | 0.638   | 0.036  | 1  | 161.325 | 0.850 | 0.283  | 1  | 188.625 | 0.595 |
| H            | 19.134 | 1  | 405.593 | <0.001  |        |    |         |       |        |    |         |       |
| E            | 0.045  | 1  | 410.252 | 0.833   | 0.187  | 1  | 165.268 | 0.666 | 0.266  | 1  | 200.551 | 0.606 |
| H:E          | 0.999  | 1  | 404.370 | 0.318   |        |    |         |       |        |    |         |       |
| P:H          | 0.060  | 1  | 400.193 | 0.806   |        |    |         |       |        |    |         |       |
| P:E          | 0.098  | 1  | 397.349 | 0.754   | 2.984  | 1  | 158.261 | 0.086 | 1.865  | 1  | 193.337 | 0.174 |
| P:H:E        | 5.331  | 1  | 395.175 | 0.021   |        |    |         |       |        |    |         |       |
| lambda       | -1.133 |    |         |         | -1.825 |    |         |       |        |    |         |       |
| <b>tnfa</b>  |        |    |         |         |        |    |         |       |        |    |         |       |
| P            | 0.359  | 1  | 338.970 | 0.550   | 0.208  | 1  | 154.090 | 0.649 | 0.028  | 1  | 259.353 | 0.867 |
| H            | 21.231 | 1  | 353.452 | <0.001  |        |    |         |       |        |    |         |       |
| E            | 0.311  | 1  | 353.835 | 0.578   | 0.059  | 1  | 157.674 | 0.808 | 0.235  | 1  | 276.352 | 0.628 |
| H:E          | 0.202  | 1  | 355.945 | 0.653   |        |    |         |       |        |    |         |       |
| P:H          | 0.009  | 1  | 350.429 | 0.925   |        |    |         |       |        |    |         |       |

Table S3b: Continued

| Treatment   | Both   |    |         |                  | Lake   |    |         |              | Stream |    |         |               |
|-------------|--------|----|---------|------------------|--------|----|---------|--------------|--------|----|---------|---------------|
|             | F      | Df | Df.res  | P                | F      | Df | Df.res  | P            | F      | Df | Df.res  | P             |
| P:E         | 0.068  | 1  | 347.053 | 0.795            | 1.731  | 1  | 151.356 | 0.190        | 1.017  | 1  | 265.825 | 0.314         |
| P:H:E       | 3.602  | 1  | 347.552 | 0.059            |        |    |         |              |        |    |         |               |
| lambda      | -2.135 |    |         |                  | -2.987 |    |         |              |        |    |         |               |
| <b>c7</b>   |        |    |         |                  |        |    |         |              |        |    |         |               |
| P           | 1.415  | 1  | 324.996 | 0.235            | 0.001  | 1  | 76.885  | 0.978        | 3.936  | 1  | 233.854 | <b>0.048</b>  |
| H           | 17.446 | 1  | 339.677 | <b>&lt;0.001</b> |        |    |         |              |        |    |         |               |
| E           | 0.034  | 1  | 341.469 | 0.854            | 0.032  | 1  | 77.286  | 0.859        | 0.334  | 1  | 249.164 | 0.564         |
| H:E         | 0.469  | 1  | 340.305 | 0.494            |        |    |         |              |        |    |         |               |
| P:H         | 1.939  | 1  | 336.232 | 0.165            |        |    |         |              |        |    |         |               |
| P:E         | 0.428  | 1  | 332.776 | 0.514            | 0.840  | 1  | 77.162  | 0.362        | 0.027  | 1  | 239.873 | 0.870         |
| P:H:E       | 0.714  | 1  | 332.556 | 0.399            |        |    |         |              |        |    |         |               |
| lambda      | -0.183 |    |         |                  |        |    |         |              |        |    |         |               |
| <b>c9</b>   |        |    |         |                  |        |    |         |              |        |    |         |               |
| P           | 1.782  | 1  | 507.855 | 0.183            | 4.143  | 1  | 331.673 | <b>0.043</b> | 0.051  | 1  | 239.233 | 0.821         |
| H           | 9.855  | 1  | 527.083 | <b>0.002</b>     |        |    |         |              |        |    |         |               |
| E           | 2.493  | 1  | 532.368 | 0.115            | 0.380  | 1  | 338.688 | 0.538        | 2.709  | 1  | 254.905 | 0.101         |
| H:E         | 0.831  | 1  | 528.162 | 0.362            |        |    |         |              |        |    |         |               |
| P:H         | 1.138  | 1  | 520.350 | 0.286            |        |    |         |              |        |    |         |               |
| P:E         | 0.019  | 1  | 519.865 | 0.890            | 0.939  | 1  | 327.410 | 0.333        | 0.353  | 1  | 245.354 | 0.553         |
| P:H:E       | 1.038  | 1  | 515.730 | 0.309            |        |    |         |              |        |    |         |               |
| lambda      |        |    |         |                  |        |    |         |              |        |    |         |               |
| <b>ighm</b> |        |    |         |                  |        |    |         |              |        |    |         |               |
| P           | 3.607  | 1  | 501.626 | 0.058            | 0.004  | 1  | 358.074 | 0.948        | 9.969  | 1  | 177.127 | <b>0.002*</b> |
| H           | 1.929  | 1  | 520.912 | 0.165            |        |    |         |              |        |    |         |               |
| E           | 0.953  | 1  | 525.823 | 0.330            | 0.541  | 1  | 365.422 | 0.462        | 0.355  | 1  | 188.642 | 0.552         |
| H:E         | 0.109  | 1  | 521.473 | 0.742            |        |    |         |              |        |    |         |               |
| P:H         | 3.579  | 1  | 514.064 | 0.059            |        |    |         |              |        |    |         |               |
| P:E         | 0.283  | 1  | 513.358 | 0.595            | 0.404  | 1  | 355.423 | 0.525        | 0.005  | 1  | 181.700 | 0.946         |
| P:H:E       | 0.224  | 1  | 509.450 | 0.636            |        |    |         |              |        |    |         |               |
| lambda      | 0.671  |    |         |                  | 0.429  |    |         |              |        |    |         |               |
| <b>ly75</b> |        |    |         |                  |        |    |         |              |        |    |         |               |
| P           | 0.409  | 1  | 477.602 | 0.523            | 0.116  | 1  | 240.899 | 0.734        | 0.308  | 1  | 189.951 | 0.579         |
| H           | 8.101  | 1  | 496.124 | <b>0.005</b>     |        |    |         |              |        |    |         |               |
| E           | 0.002  | 1  | 500.476 | 0.967            | 0.096  | 1  | 246.532 | 0.758        | 0.062  | 1  | 202.030 | 0.803         |
| H:E         | 0.195  | 1  | 497.937 | 0.659            |        |    |         |              |        |    |         |               |
| P:H         | 0.027  | 1  | 490.272 | 0.870            |        |    |         |              |        |    |         |               |
| P:E         | 0.105  | 1  | 489.027 | 0.746            | 1.556  | 1  | 239.883 | 0.213        | 0.618  | 1  | 194.953 | 0.433         |
| P:H:E       | 2.168  | 1  | 485.988 | 0.142            |        |    |         |              |        |    |         |               |
| lambda      | -2.027 |    |         |                  | -1.769 |    |         |              | -1.689 |    |         |               |
| <b>il16</b> |        |    |         |                  |        |    |         |              |        |    |         |               |

**Table S3b: Continued**

| Treatment    | Both   |    |         |              | Lake   |    |         |              | Stream |    |        |              |
|--------------|--------|----|---------|--------------|--------|----|---------|--------------|--------|----|--------|--------------|
|              | F      | Df | Df.res  | P            | F      | Df | Df.res  | P            | F      | Df | Df.res | P            |
| P            | 0.074  | 1  | 394.025 | 0.786        | 0.139  | 1  | 372.070 | 0.709        | 0.001  | 1  | 57.837 | 0.976        |
| H            | 3.833  | 1  | 410.374 | 0.051        |        |    |         |              |        |    |        |              |
| E            | 0.103  | 1  | 412.125 | 0.749        | 1.023  | 1  | 381.215 | 0.312        | 0.023  | 1  | 60.231 | 0.881        |
| H:E          | 0.333  | 1  | 412.747 | 0.564        |        |    |         |              |        |    |        |              |
| P:H          | 0.048  | 1  | 406.292 | 0.826        |        |    |         |              |        |    |        |              |
| P:E          | 0.186  | 1  | 403.474 | 0.666        | 5.022  | 1  | 369.982 | <b>0.026</b> | 1.272  | 1  | 58.989 | 0.264        |
| P:H:E        | 5.253  | 1  | 402.857 | 0.022        |        |    |         |              |        |    |        |              |
| lambda       |        |    |         |              | -2.206 |    |         |              |        |    |        |              |
| <b>mhcll</b> |        |    |         |              |        |    |         |              |        |    |        |              |
| P            | 0.583  | 1  | 335.290 | 0.446        | 1.518  | 1  | 372.070 | 0.219        | 4.119  | 1  | 70.528 | <b>0.046</b> |
| H            | 1.307  | 1  | 349.635 | 0.254        |        |    |         |              |        |    |        |              |
| E            | 1.052  | 1  | 349.936 | 0.306        | 1.578  | 1  | 381.215 | 0.210        | 0.231  | 1  | 74.593 | 0.632        |
| H:E          | 0.569  | 1  | 352.129 | 0.451        |        |    |         |              |        |    |        |              |
| P:H          | 4.962  | 1  | 346.680 | <b>0.027</b> |        |    |         |              |        |    |        |              |
| P:E          | 0.495  | 1  | 343.280 | 0.482        | 0.000  | 1  | 369.982 | 0.986        | 0.722  | 1  | 72.329 | 0.398        |
| P:H:E        | 0.314  | 1  | 343.840 | 0.576        |        |    |         |              |        |    |        |              |
| lambda       | -0.039 |    |         |              | -0.731 |    |         |              |        |    |        |              |



**Table S4a. Multivariate analysis on gene expression profiles for lab-bred adults in a common garden setting.** We tested the effects on each functional gene group (e.g. stress response, metabolism genes, etc). Treatments correspond to the effects of host ecotype (H), parasite exposure (P), and their interaction (H:P). Significant P values are highlighted in bold.

|           | Df | F                              | R <sup>2</sup> | P            | F                               | R <sup>2</sup> | P     | F                        | R <sup>2</sup> | P            | F                               | R <sup>2</sup> | P     |
|-----------|----|--------------------------------|----------------|--------------|---------------------------------|----------------|-------|--------------------------|----------------|--------------|---------------------------------|----------------|-------|
|           |    | <b>All genes</b>               |                |              | <b>Stress response</b>          |                |       | <b>Metabolism genes</b>  |                |              | <b>Innate cellular immunity</b> |                |       |
| H         | 1  | 3.859                          | 0.261          | <b>0.041</b> | -0.159                          | -0.018         | 0.843 | 13.608                   | 0.356          | <b>0.037</b> | 3.731                           | 0.292          | 0.124 |
| P         | 1  | 1.307                          | 0.088          | 0.323        | 2.043                           | 0.229          | 0.305 | 5.39                     | 0.141          | 0.153        | 0.065                           | 0.005          | 0.625 |
| H:P       | 1  | 1.617                          | 0.109          | 0.232        | -0.955                          | -0.107         | 0.927 | 11.201                   | 0.293          | <b>0.041</b> | 0.998                           | 0.078          | 0.375 |
| Residuals | 8  |                                | 0.541          |              |                                 | 0.896          |       |                          | 0.209          |              |                                 | 0.625          |       |
| Total     | 11 |                                | 1              |              |                                 | 1              |       |                          | 1              |              |                                 | 1              |       |
|           |    | <b>Innate humoral immunity</b> |                |              | <b>Innate immune signalling</b> |                |       | <b>Complement system</b> |                |              | <b>Adaptive immunity</b>        |                |       |
| H         | 1  | 0.156                          | 0.015          | 0.511        | 0.537                           | 0.067          | 0.505 | -1.036                   | -0.162         | 0.923        | -0.788                          | -0.089         | 0.926 |
| P         | 1  | 1.071                          | 0.102          | 0.314        | 0.438                           | 0.054          | 0.545 | -0.012                   | -0.002         | 0.579        | 0.585                           | 0.066          | 0.468 |
| H:P       | 1  | 1.247                          | 0.119          | 0.286        | -0.896                          | -0.111         | 0.965 | -0.535                   | -0.083         | 0.785        | 1.055                           | 0.119          | 0.326 |
| Residuals | 8  |                                | 0.764          |              |                                 | 0.99           |       |                          | 1.247          |              |                                 | 0.904          |       |
| Total     | 11 |                                | 1              |              |                                 | 1              |       |                          | 1              |              |                                 | 1              |       |



**Table S5a: Results of multivariate analyses from genes to ecosystems based on redundancy analyses (RDA).** The multivariate response of gene expression (partial-RDA), diet composition (db-RDA), zooplankton community structure (db-RDA), and ecosystem properties (partial-RDA) were tested for the overall effects of the experimental treatment, and for the effects on each host ecotype as well as for each environmental treatment. In addition, ecosystem effects were divided into five major categories (e.g. physico-chemical properties, final nutrient concentrations, ecosystem functions and biological parameters). Treatments correspond to the effects of host (H), environment (E), parasite exposure (P), and their interactions (e.g. HxE). Significant P values are highlighted in bold.

| Treatment                                         | Df | F     | All               |                | by host |       |              |                |    |       |              |                | by environment |       |              |                |    |       |              |                |  |
|---------------------------------------------------|----|-------|-------------------|----------------|---------|-------|--------------|----------------|----|-------|--------------|----------------|----------------|-------|--------------|----------------|----|-------|--------------|----------------|--|
|                                                   |    |       | P                 | R <sup>2</sup> | Lake    |       | Stream       |                |    |       | High         |                | Low            |       |              | R <sup>2</sup> |    |       |              |                |  |
|                                                   |    |       |                   |                | Df      | F     | P            | R <sup>2</sup> | Df | F     | P            | R <sup>2</sup> | Df             | F     | P            | R <sup>2</sup> | Df | F     | P            | R <sup>2</sup> |  |
| <b>Effects on gene expression</b>                 |    |       |                   |                |         |       |              |                |    |       |              |                |                |       |              |                |    |       |              |                |  |
| P                                                 | 1  | 0.633 | 0.660             | 0.013          | 1       | 0.7   | 0.637        | 0.034          | 1  | 1.008 | 0.397        | 0.046          | 1              | 0.575 | 0.633        | 0.021          | 1  | 0.563 | 0.726        | 0.025          |  |
| H                                                 | 1  | 9.229 | <b>&lt; 0.001</b> | 0.189          |         |       |              |                |    |       |              |                | 1              | 5.528 | <b>0.003</b> | 0.197          | 1  | 4.527 | <b>0.006</b> | 0.203          |  |
| E                                                 | 1  | 0.796 | 0.515             | 0.016          | 1       | 1.011 | 0.394        | 0.050          | 1  | 0.691 | 0.638        | 0.032          |                |       |              |                |    |       |              |                |  |
| H:E                                               | 1  | 0.786 | 0.519             | 0.016          |         |       |              |                |    |       |              |                |                |       |              |                |    |       |              |                |  |
| H:P                                               | 1  | 1.135 | 0.294             | 0.023          |         |       |              |                |    |       |              |                | 1              | 1.325 | 0.246        | 0.047          | 1  | 1.482 | 0.208        | 0.067          |  |
| P:E                                               | 1  | 0.476 | 0.812             | 0.010          | 1       | 1.858 | 0.096        | 0.091          | 1  | 0.627 | 0.712        | 0.029          |                |       |              |                |    |       |              |                |  |
| H:E:P                                             | 1  | 1.485 | 0.169             | 0.030          |         |       |              |                |    |       |              |                |                |       |              |                |    |       |              |                |  |
| Res                                               | 26 |       |                   | 0.532          | 10      |       |              | 0.491          | 12 |       |              | 0.552          | 11             |       |              | 0.393          | 11 |       |              | 0.494          |  |
| <b>Effects on diet composition</b>                |    |       |                   |                |         |       |              |                |    |       |              |                |                |       |              |                |    |       |              |                |  |
| P                                                 | 1  | 2.777 | <b>0.020</b>      | 0.064          | 1       | 1.311 | 0.28         | 0.077          | 1  | 1.899 | 0.118        | 0.073          | 1              | 1.859 | 0.115        | 0.092          | 1  | 1.054 | 0.38         | 0.056          |  |
| H                                                 | 1  | 0.846 | 0.522             | 0.020          |         |       |              |                |    |       |              |                | 1              | 0.345 | 0.881        | 0.017          | 1  | 0.834 | 0.503        | 0.044          |  |
| E                                                 | 1  | 1.145 | 0.348             | 0.027          | 1       | 0.843 | 0.539        | 0.050          | 1  | 0.857 | 0.47         | 0.033          |                |       |              |                |    |       |              |                |  |
| H:E                                               | 1  | 0.722 | 0.635             | 0.017          |         |       |              |                |    |       |              |                |                |       |              |                |    |       |              |                |  |
| H:P                                               | 1  | 0.435 | 0.816             | 0.010          |         |       |              |                |    |       |              |                | 1              | 0.244 | 0.942        | 0.012          | 1  | 0.525 | 0.767        | 0.028          |  |
| P:E                                               | 1  | 0.449 | 0.801             | 0.010          | 1       | 0.208 | 0.985        | 0.012          | 1  | 0.584 | 0.737        | 0.022          |                |       |              |                |    |       |              |                |  |
| H:E:P                                             | 1  | 0.473 | 0.794             | 0.011          |         |       |              |                |    |       |              |                |                |       |              |                |    |       |              |                |  |
| Res                                               | 25 |       |                   | 0.581          | 9       |       |              | 0.529          | 12 |       |              | 0.461          | 11             |       |              | 0.542          | 10 |       |              | 0.532          |  |
| <b>Effects on zooplankton community structure</b> |    |       |                   |                |         |       |              |                |    |       |              |                |                |       |              |                |    |       |              |                |  |
| P                                                 | 1  | 1.312 | 0.227             | 0.028          | 1       | 3.734 | <b>0.014</b> | 0.168          | 1  | 0.411 | 0.870        | 0.018          | 1              | 0.18  | 0.995        | 0.008          | 1  | 3.653 | <b>0.042</b> | 0.154          |  |
| H                                                 | 1  | 1.549 | 0.162             | 0.033          |         |       |              |                |    |       |              |                | 1              | 3.024 | <b>0.033</b> | 0.138          | 1  | 2.201 | 0.085        | 0.093          |  |
| E                                                 | 1  | 1.003 | 0.373             | 0.021          | 1       | 1.847 | 0.117        | 0.083          | 1  | 3.097 | <b>0.027</b> | 0.137          |                |       |              |                |    |       |              |                |  |

Table S5a: (continued)

| Treatment                                                      | Df | F      | P              | R <sup>2</sup> | Lake |       |                |                | Stream |        |              |                | High |       |              |                | Low |       |       |                |
|----------------------------------------------------------------|----|--------|----------------|----------------|------|-------|----------------|----------------|--------|--------|--------------|----------------|------|-------|--------------|----------------|-----|-------|-------|----------------|
|                                                                |    |        |                |                | Df   | F     | P              | R <sup>2</sup> | Df     | F      | P            | R <sup>2</sup> | Df   | F     | P            | R <sup>2</sup> | Df  | F     | P     | R <sup>2</sup> |
| H:E                                                            | 1  | 3.901  | <b>0.011</b>   | 0.083          |      |       |                |                |        |        |              |                |      |       |              |                |     |       |       |                |
| H:P                                                            | 1  | 3.141  | <b>0.028</b>   | 0.067          |      |       |                |                |        |        |              |                | 1    | 2.834 | <b>0.041</b> | 0.130          | 1   | 1.185 | 0.305 | 0.050          |
| P:E                                                            | 1  | 1.912  | 0.128          | 0.041          | 1    | 0.925 | 0.425          | 0.042          | 1      | 2.301  | 0.079        | 0.102          |      |       |              |                |     |       |       |                |
| H:E:P                                                          | 1  | 1.243  | 0.247          | 0.027          |      |       |                |                |        |        |              |                |      |       |              |                |     |       |       |                |
| Res                                                            | 28 |        |                | 0.597          | 12   |       |                | 0.540          | 12     |        |              | 0.531          | 12   |       |              | 0.549          | 12  |       |       | 0.505          |
| <b>Overall effects on the ecosystem</b>                        |    |        |                |                |      |       |                |                |        |        |              |                |      |       |              |                |     |       |       |                |
| P                                                              | 1  | 0.468  | 0.967          | 0.008          | 1    | 0.777 | 0.698          | 0.027          | 1      | 0.551  | 0.890        | 0.021          | 1    | 1     | 0.436        | 0.040          | 1   | 0.754 | 0.743 | 0.035          |
| H                                                              | 1  | 1.225  | 0.227          | 0.022          |      |       |                |                |        |        |              |                | 1    | 1.864 | <b>0.030</b> | 0.074          | 1   | 1.057 | 0.344 | 0.050          |
| E                                                              | 1  | 7.443  | < <b>0.001</b> | 0.134          | 1    | 3.833 | < <b>0.001</b> | 0.133          | 1      | 4.678  | <b>0.003</b> | 0.181          |      |       |              |                |     |       |       |                |
| H:E                                                            | 1  | 1.475  | 0.121          | 0.027          |      |       |                |                |        |        |              |                |      |       |              |                |     |       |       |                |
| H:P                                                            | 1  | 0.962  | 0.476          | 0.017          |      |       |                |                |        |        |              |                | 1    | 1.439 | 0.136        | 0.057          | 1   | 0.445 | 0.974 | 0.021          |
| P:E                                                            | 1  | 1.415  | 0.140          | 0.026          | 1    | 1.625 | 0.093          | 0.056          | 1      | 0.865  | 0.564        | 0.033          |      |       |              |                |     |       |       |                |
| H:E:P                                                          | 1  | 1.087  | 0.340          | 0.020          |      |       |                |                |        |        |              |                |      |       |              |                |     |       |       |                |
| Res                                                            | 27 |        |                | 0.487          | 11   |       |                | 0.382          | 12     |        |              | 0.465          | 11   |       |              | 0.437          | 12  |       |       | 0.565          |
| <b>Effects on physico-chemical properties of the ecosystem</b> |    |        |                |                |      |       |                |                |        |        |              |                |      |       |              |                |     |       |       |                |
| P                                                              | 1  | 0.570  | 0.628          | 0.008          | 1    | 0.669 | 0.621          | 0.021          | 1      | 0.520  | 0.657        | 0.014          | 1    | 0.885 | 0.507        | 0.038          | 1   | 0.507 | 0.746 | 0.024          |
| H                                                              | 1  | 0.840  | 0.456          | 0.012          |      |       |                |                |        |        |              |                | 1    | 1.364 | 0.236        | 0.059          | 1   | 1.128 | 0.347 | 0.052          |
| E                                                              | 1  | 21.750 | < <b>0.001</b> | 0.306          | 1    | 7.459 | < <b>0.001</b> | 0.237          | 1      | 14.443 | <b>0.003</b> | 0.400          |      |       |              |                |     |       |       |                |
| H:E                                                            | 1  | 0.956  | 0.418          | 0.013          |      |       |                |                |        |        |              |                |      |       |              |                |     |       |       |                |
| H:P                                                            | 1  | 0.726  | 0.532          | 0.010          |      |       |                |                |        |        |              |                |      |       |              |                |     |       |       |                |
| P:E                                                            | 1  | 0.811  | 0.492          | 0.011          | 1    | 1.009 | 0.435          | 0.032          | 1      | 0.328  | 0.776        | 0.009          | 1    | 1.100 | 0.381        | 0.047          | 1   | 0.239 | 0.922 | 0.011          |
| H:E:P                                                          | 1  | 0.850  | 0.452          | 0.012          |      |       |                |                |        |        |              |                |      |       |              |                |     |       |       |                |
| Res                                                            | 27 |        |                | 0.380          | 11   |       |                | 0.35           | 12     |        |              | 0.332          | 11   |       |              | 0.473          | 12  |       |       | 0.556          |

Table S5a: (continued)

| Treatment                                                        | Df | F     | P                 | R <sup>2</sup> | Lake |       |                   |                | Stream |       |              |                | High |       |              |                | Low |       |       |                |
|------------------------------------------------------------------|----|-------|-------------------|----------------|------|-------|-------------------|----------------|--------|-------|--------------|----------------|------|-------|--------------|----------------|-----|-------|-------|----------------|
|                                                                  |    |       |                   |                | Df   | F     | P                 | R <sup>2</sup> | Df     | F     | P            | R <sup>2</sup> | Df   | F     | P            | R <sup>2</sup> | Df  | F     | P     | R <sup>2</sup> |
| <b>Effects on final nutrient concentrations of the ecosystem</b> |    |       |                   |                |      |       |                   |                |        |       |              |                |      |       |              |                |     |       |       |                |
| P                                                                | 1  | 0.894 | 0.482             | 0.016          | 1    | 1.028 | 0.400             | 0.044          | 1      | 0.419 | 0.923        | 0.015          | 1    | 1.973 | 0.059        | 0.067          | 1   | 1.364 | 0.214 | 0.060          |
| H                                                                | 1  | 2.414 | <b>0.024</b>      | 0.044          |      |       |                   |                |        |       |              |                | 1    | 2.371 | <b>0.032</b> | 0.080          | 1   | 0.700 | 0.652 | 0.031          |
| E                                                                | 1  | 2.030 | <b>0.048</b>      | 0.037          | 1    | 0.982 | 0.412             | 0.042          | 1      | 1.454 | 0.200        | 0.052          |      |       |              |                |     |       |       |                |
| H:E                                                              | 1  | 0.443 | 0.910             | 0.008          |      |       |                   |                |        |       |              |                |      |       |              |                |     |       |       |                |
| H:P                                                              | 1  | 1.07  | 0.385             | 0.020          |      |       |                   |                |        |       |              |                | 1    | 2.328 | <b>0.040</b> | 0.079          | 1   | 0.545 | 0.815 | 0.024          |
| P:E                                                              | 1  | 2.587 | <b>0.019</b>      | 0.048          | 1    | 1.505 | 0.149             | 0.064          | 1      | 2.897 | <b>0.003</b> | 0.103          |      |       |              |                |     |       |       |                |
| H:E:P                                                            | 1  | 1.683 | 0.119             | 0.031          |      |       |                   |                |        |       |              |                |      |       |              |                |     |       |       |                |
| Res                                                              | 27 |       |                   | 0.497          | 11   |       |                   | 0.470          | 12     |       |              | 0.428          | 11   |       |              | 0.371          | 12  |       |       | 0.523          |
| <b>Effects on ecosystem functions</b>                            |    |       |                   |                |      |       |                   |                |        |       |              |                |      |       |              |                |     |       |       |                |
| P                                                                | 1  | 0.152 | 0.987             | 0.003          | 1    | 0.486 | 0.831             | 0.013          | 1      | 0.825 | 0.511        | 0.036          | 1    | 0.494 | 0.777        | 0.018          | 1   | 0.261 | 0.943 | 0.011          |
| H                                                                | 1  | 0.454 | 0.843             | 0.009          |      |       |                   |                |        |       |              |                | 1    | 0.601 | 0.733        | 0.022          | 1   | 1.242 | 0.296 | 0.055          |
| E                                                                | 1  | 2.399 | <b>0.037</b>      | 0.045          | 1    | 1.811 | 0.102             | 0.049          | 1      | 2.155 | 0.079        | 0.095          |      |       |              |                |     |       |       |                |
| H:E                                                              | 1  | 1.320 | 0.265             | 0.025          |      |       |                   |                |        |       |              |                |      |       |              |                |     |       |       |                |
| H:P                                                              | 1  | 1.165 | 0.327             | 0.022          |      |       |                   |                |        |       |              |                | 1    | 0.985 | 0.457        | 0.035          | 1   | 0.531 | 0.731 | 0.023          |
| P:E                                                              | 1  | 0.545 | 0.728             | 0.010          | 1    | 0.800 | 0.569             | 0.022          | 1      | 0.195 | 0.970        | 0.009          |      |       |              |                |     |       |       |                |
| H:E:P                                                            | 1  | 0.298 | 0.934             | 0.006          |      |       |                   |                |        |       |              |                |      |       |              |                |     |       |       |                |
| Res                                                              | 27 |       |                   | 0.508          | 11   |       |                   | 0.299          | 12     |       |              | 0.529          | 11   |       |              | 0.394          | 12  |       |       | 0.527          |
| <b>Effects on biological parameters of the ecosystem</b>         |    |       |                   |                |      |       |                   |                |        |       |              |                |      |       |              |                |     |       |       |                |
| P                                                                | 1  | 0.279 | 0.945             | 0.006          | 1    | 0.796 | 0.522             | 0.030          | 1      | 0.825 | 0.511        | 0.036          | 1    | 0.754 | 0.615        | 0.036          | 1   | 0.892 | 0.472 | 0.050          |
| H                                                                | 1  | 1.115 | 0.366             | 0.024          |      |       |                   |                |        |       |              |                | 1    | 3.111 | <b>0.011</b> | 0.148          | 1   | 1.147 | 0.341 | 0.064          |
| E                                                                | 1  | 7.054 | <b>&lt; 0.001</b> | 0.151          | 1    | 5.784 | <b>&lt; 0.001</b> | 0.218          | 1      | 2.155 | <b>0.079</b> | 0.095          |      |       |              |                |     |       |       |                |
| H:E                                                              | 1  | 3.107 | <b>0.009</b>      | 0.067          |      |       |                   |                |        |       |              |                |      |       |              |                |     |       |       |                |
| H:P                                                              | 1  | 0.822 | 0.558             | 0.018          |      |       |                   |                |        |       |              |                | 1    | 1.459 | 0.236        | 0.07           | 1   | 0.476 | 0.827 | 0.027          |
| P:E                                                              | 1  | 1.599 | 0.147             | 0.034          | 1    | 3.123 | <b>0.036</b>      | 0.118          | 1      | 0.195 | 0.97         | 0.009          |      |       |              |                |     |       |       |                |
| H:E:P                                                            | 1  | 1.491 | 0.212             | 0.032          |      |       |                   |                |        |       |              |                |      |       |              |                |     |       |       |                |
| Res                                                              | 27 |       |                   | 0.580          | 11   |       |                   | 0.415          | 12     |       |              | 0.529          | 11   |       |              | 0.524          | 12  |       |       | 0.670          |

**Table S5b: Univariate LMMs testing effects of experimental treatments on each prey category, zooplankton category, and ecosystem measurement.** Codes represent: confidence intervals ( $CI_{lower}$  and  $CI_{upper}$ ), standardized effect sizes (ES), standard errors ( $SE \pm$ ), and relative importance (RI). Treatments correspond to the effects of host (H), environment (E), parasite exposure (P), and their interactions (e.g. H:E). P-values lower than 0.05 are highlighted in bold and significant P-values after FDR correction according to Benjamini-Yekutieli are marked with \*.

| Treatment                           | F     | Df <sub>res</sub> | CI <sub>lower</sub> | CI <sub>upper</sub> | ES     | SE ( $\pm$ ) | RI    | P            |
|-------------------------------------|-------|-------------------|---------------------|---------------------|--------|--------------|-------|--------------|
| <b>Effects on prey items (Diet)</b> |       |                   |                     |                     |        |              |       |              |
| <b>Collembola</b>                   |       |                   |                     |                     |        |              |       |              |
| P                                   | 0.167 | 717.596           | -0.034              | 0.053               | 0.010  | 0.022        | 0.020 | 0.683        |
| H                                   | 0.023 | 724.232           | -0.046              | 0.041               | -0.003 | 0.022        | 0.018 | 0.879        |
| E                                   | 0.977 | 700.723           | -0.021              | 0.065               | 0.022  | 0.022        | 0.030 | 0.323        |
| H:E                                 | 0.304 | 723.656           | -0.057              | 0.118               | 0.030  | 0.044        | 0.000 | 0.582        |
| H:P                                 | 0.412 | 729.860           | -0.064              | 0.112               | 0.024  | 0.044        | 0.000 | 0.521        |
| P:E                                 | 1.257 | 719.505           | -0.136              | 0.037               | -0.050 | 0.044        | 0.000 | 0.263        |
| H:E:P                               | 1.947 | 730.451           | -0.051              | 0.302               | 0.126  | 0.089        | 0.000 | 0.163        |
| <b>Nymph</b>                        |       |                   |                     |                     |        |              |       |              |
| P                                   | 3.777 | 136.802           | -0.137              | -0.001              | -0.069 | 0.034        | 0.178 | 0.054        |
| H                                   | 1.252 | 144.816           | -0.109              | 0.032               | -0.039 | 0.036        | 0.051 | 0.265        |
| E                                   | 0.586 | 136.700           | -0.101              | 0.039               | -0.031 | 0.035        | 0.042 | 0.445        |
| H:E                                 | 0.007 | 144.241           | -0.163              | 0.130               | -0.017 | 0.074        | 0.000 | 0.931        |
| H:P                                 | 0.272 | 144.257           | -0.104              | 0.179               | 0.037  | 0.071        | 0.001 | 0.603        |
| P:E                                 | 0.254 | 139.400           | -0.102              | 0.178               | 0.038  | 0.071        | 0.000 | 0.615        |
| H:E:P                               | 0.123 | 143.668           | -0.251              | 0.361               | 0.055  | 0.154        | 0.000 | 0.727        |
| <b>Chironomids</b>                  |       |                   |                     |                     |        |              |       |              |
| P                                   | 0.319 | 161.247           | -0.184              | 0.092               | -0.046 | 0.070        | 0.071 | 0.573        |
| H                                   | 1.876 | 170.501           | -0.045              | 0.228               | 0.092  | 0.069        | 0.127 | 0.173        |
| E                                   | 4.660 | 160.792           | -0.276              | -0.011              | -0.144 | 0.067        | 0.344 | <b>0.032</b> |
| H:E                                 | 0.076 | 169.659           | -0.222              | 0.309               | 0.044  | 0.134        | 0.006 | 0.784        |
| H:P                                 | 0.769 | 169.918           | -0.166              | 0.387               | 0.110  | 0.140        | 0.001 | 0.382        |
| P:E                                 | 0.425 | 164.149           | -0.348              | 0.193               | -0.078 | 0.136        | 0.003 | 0.516        |
| H:E:P                               | 0.030 | 169.071           | -0.607              | 0.507               | -0.050 | 0.281        | 0.000 | 0.862        |
| <b>Ostracoda</b>                    |       |                   |                     |                     |        |              |       |              |
| P                                   | 1.341 | 266.529           | -0.156              | 0.032               | -0.062 | 0.048        | 0.086 | 0.248        |
| H                                   | 1.849 | 279.189           | -0.026              | 0.160               | 0.067  | 0.047        | 0.100 | 0.175        |
| E                                   | 1.648 | 263.634           | -0.152              | 0.034               | -0.060 | 0.047        | 0.082 | 0.200        |
| H:E                                 | 0.144 | 277.042           | -0.156              | 0.220               | 0.032  | 0.095        | 0.001 | 0.704        |
| H:P                                 | 0.430 | 278.751           | -0.263              | 0.117               | -0.073 | 0.096        | 0.001 | 0.513        |
| P:E                                 | 0.001 | 269.723           | -0.198              | 0.183               | -0.007 | 0.096        | 0.000 | 0.982        |
| H:E:P                               | 0.350 | 276.967           | -0.523              | 0.280               | -0.122 | 0.202        | 0.000 | 0.555        |
| <b>Chydoridae</b>                   |       |                   |                     |                     |        |              |       |              |

**Table S5b:** continued

| <b>Treatment</b>              | <b>F</b> | <b>Df<sub>res</sub></b> | <b>CI<sub>lower</sub></b> | <b>CI<sub>upper</sub></b> | <b>ES</b> | <b>SE (±)</b> | <b>RI</b> | <b>P</b>      |
|-------------------------------|----------|-------------------------|---------------------------|---------------------------|-----------|---------------|-----------|---------------|
| P                             | 0.082    | 129.553                 | -0.128                    | 0.180                     | 0.026     | 0.078         | 0.065     | 0.775         |
| H                             | 1.437    | 137.162                 | -0.249                    | 0.051                     | -0.099    | 0.076         | 0.131     | 0.233         |
| E                             | 0.481    | 129.534                 | -0.103                    | 0.203                     | 0.050     | 0.077         | 0.077     | 0.489         |
| H:E                           | 1.429    | 136.657                 | -0.489                    | 0.112                     | -0.188    | 0.152         | 0.003     | 0.234         |
| H:P                           | 0.018    | 136.614                 | -0.333                    | 0.288                     | -0.022    | 0.157         | 0.001     | 0.895         |
| P:E                           | 0.085    | 132.038                 | -0.358                    | 0.274                     | -0.042    | 0.160         | 0.001     | 0.771         |
| H:E:P                         | 0.30     | 136.100                 | -0.824                    | 0.462                     | -0.181    | 0.324         | 0.000     | 0.585         |
| <b>Cyclopoida</b>             |          |                         |                           |                           |           |               |           |               |
| P                             | 3.861    | 148.078                 | 0.005                     | 0.292                     | 0.149     | 0.072         | 0.331     | <b>0.050</b>  |
| H                             | 0.450    | 156.688                 | -0.105                    | 0.191                     | 0.043     | 0.075         | 0.072     | 0.504         |
| E                             | < 0.01   | 147.826                 | -0.144                    | 0.152                     | 0.004     | 0.074         | 0.062     | 1.000         |
| H:E                           | 2.578    | 155.994                 | -0.032                    | 0.542                     | 0.255     | 0.145         | 0.002     | 0.110         |
| H:P                           | 0.012    | 156.115                 | -0.314                    | 0.277                     | -0.018    | 0.149         | 0.003     | 0.913         |
| P:E                           | 0.008    | 150.830                 | -0.324                    | 0.267                     | -0.028    | 0.149         | 0.002     | 0.931         |
| H:E:P                         | 0.662    | 155.407                 | -0.344                    | 0.840                     | 0.248     | 0.299         | 0.000     | 0.417         |
| <b>Effects on Zooplankton</b> |          |                         |                           |                           |           |               |           |               |
| <b>Cladocera</b>              |          |                         |                           |                           |           |               |           |               |
| P                             | 2.566    | 28                      | -0.120                    | 0.013                     | -0.054    | 0.033         | 0.664     | 0.120         |
| H                             | 6.770    | 28                      | -0.155                    | -0.020                    | -0.088    | 0.033         | 0.908     | <b>0.015*</b> |
| E                             | 0.191    | 28                      | -0.052                    | 0.082                     | 0.015     | 0.033         | 0.301     | 0.665         |
| H:E                           | 0.191    | 28                      | -0.162                    | 0.104                     | -0.029    | 0.065         | 0.062     | 0.665         |
| H:P                           | 2.566    | 28                      | -0.022                    | 0.238                     | 0.108     | 0.064         | 0.326     | 0.120         |
| P:E                           | 2.065    | 28                      | -0.226                    | 0.033                     | -0.097    | 0.064         | 0.096     | 0.162         |
| H:E:P                         | 2.065    | 28                      | -0.052                    | 0.439                     | 0.193     | 0.120         | 0.004     | 0.162         |
| <b>Bosmina</b>                |          |                         |                           |                           |           |               |           |               |
| P                             | 2.158    | 28                      | -0.163                    | 0.022                     | -0.071    | 0.046         | 0.520     | 0.153         |
| H                             | 0.449    | 28                      | -0.125                    | 0.061                     | -0.032    | 0.046         | 0.340     | 0.508         |
| E                             | 1.629    | 28                      | -0.031                    | 0.154                     | 0.062     | 0.046         | 0.461     | 0.212         |
| H:E                           | 1.626    | 28                      | -0.304                    | 0.058                     | -0.123    | 0.089         | 0.057     | 0.213         |
| H:P                           | 1.034    | 28                      | -0.084                    | 0.280                     | 0.098     | 0.089         | 0.049     | 0.318         |
| P:E                           | 0.029    | 28                      | -0.167                    | 0.199                     | 0.016     | 0.090         | 0.066     | 0.866         |
| H:E:P                         | 0.284    | 28                      | -0.249                    | 0.455                     | 0.103     | 0.172         | 0.000     | 0.599         |
| <b>Copepoda</b>               |          |                         |                           |                           |           |               |           |               |
| P                             | < 0.01   | 28                      | -0.082                    | 0.081                     | -0.001    | 0.040         | 0.269     | 0.985         |
| H                             | 1.268    | 28                      | -0.126                    | 0.036                     | -0.045    | 0.040         | 0.372     | 0.270         |
| E                             | < 0.01   | 28                      | -0.081                    | 0.082                     | 0.001     | 0.040         | 0.267     | 0.985         |
| H:E                           | < 0.01   | 28                      | -0.160                    | 0.162                     | 0.001     | 0.079         | 0.021     | 0.991         |
| H:P                           | 0.234    | 28                      | -0.200                    | 0.122                     | -0.039    | 0.079         | 0.024     | 0.632         |
| P:E                           | 2.655    | 28                      | -0.290                    | 0.027                     | -0.131    | 0.078         | 0.047     | 0.114         |
| H:E:P                         | 4.548    | 28                      | 0.049                     | 0.639                     | 0.344     | 0.144         | 0.001     | <b>0.042</b>  |

**Table S5b:** continued

| Treatment                     | F      | Df <sub>res</sub> | CI <sub>lower</sub> | CI <sub>upper</sub> | ES     | SE (±) | RI    | P             |
|-------------------------------|--------|-------------------|---------------------|---------------------|--------|--------|-------|---------------|
| <b>Naupli</b>                 |        |                   |                     |                     |        |        |       |               |
| P                             | 0.625  | 28                | -0.181              | 0.449               | 0.134  | 0.155  | 0.343 | 0.436         |
| H                             | 10.737 | 28                | -0.873              | -0.240              | -0.556 | 0.156  | 0.988 | <b>0.003*</b> |
| E                             | 0.926  | 28                | -0.478              | 0.151               | -0.163 | 0.155  | 0.379 | 0.344         |
| H:E                           | 0.141  | 28                | -0.755              | 0.500               | -0.127 | 0.309  | 0.077 | 0.710         |
| H:P                           | 0.300  | 28                | -0.814              | 0.442               | -0.186 | 0.309  | 0.075 | 0.588         |
| P:E                           | 0.058  | 28                | -0.707              | 0.544               | -0.082 | 0.307  | 0.025 | 0.812         |
| H:E:P                         | 0.298  | 28                | -0.870              | 1.611               | 0.370  | 0.607  | 0.000 | 0.590         |
| <b>Ostracoda</b>              |        |                   |                     |                     |        |        |       |               |
| P                             | 3.549  | 28                | -0.002              | 0.096               | 0.047  | 0.024  | 0.660 | 0.070         |
| H                             | 0.149  | 28                | -0.059              | 0.040               | -0.010 | 0.024  | 0.293 | 0.702         |
| E                             | 0.591  | 28                | -0.030              | 0.069               | 0.019  | 0.024  | 0.344 | 0.448         |
| H:E                           | 2.254  | 28                | -0.171              | 0.022               | -0.075 | 0.047  | 0.042 | 0.144         |
| H:P                           | 0.149  | 28                | -0.117              | 0.078               | -0.019 | 0.048  | 0.054 | 0.702         |
| P:E                           | 0.591  | 28                | -0.059              | 0.135               | 0.038  | 0.048  | 0.060 | 0.448         |
| H:E:P                         | 2.254  | 28                | -0.332              | 0.032               | -0.150 | 0.089  | 0.001 | 0.144         |
| <b>Mix Arthropods</b>         |        |                   |                     |                     |        |        |       |               |
| P                             | 1.084  | 28                | -0.378              | 0.122               | -0.128 | 0.123  | 0.377 | 0.307         |
| H                             | 0.129  | 28                | -0.208              | 0.296               | 0.044  | 0.124  | 0.291 | 0.723         |
| E                             | 0.069  | 28                | -0.219              | 0.284               | 0.032  | 0.124  | 0.263 | 0.795         |
| H:E                           | 1.334  | 28                | -0.209              | 0.778               | 0.284  | 0.242  | 0.029 | 0.258         |
| H:P                           | 0.006  | 28                | -0.516              | 0.478               | -0.019 | 0.244  | 0.022 | 0.939         |
| P:E                           | 2.558  | 28                | -0.093              | 0.880               | 0.394  | 0.239  | 0.065 | 0.121         |
| H:E:P                         | 4.034  | 28                | -1.887              | -0.090              | -0.988 | 0.440  | 0.002 | 0.054         |
| <b>Brachionidae (rotifer)</b> |        |                   |                     |                     |        |        |       |               |
| P                             | 2.686  | 28                | -1.005              | 0.075               | -0.465 | 0.265  | 0.926 | 0.112         |
| H                             | 5.863  | 28                | -1.235              | -0.140              | -0.687 | 0.269  | 0.971 | <b>0.022</b>  |
| E                             | 1.725  | 28                | -0.916              | 0.170               | -0.373 | 0.267  | 0.882 | 0.200         |
| H:E                           | 9.463  | 28                | 0.669               | 2.824               | 1.746  | 0.530  | 0.599 | <b>0.005*</b> |
| H:P                           | 0.022  | 28                | -0.990              | 1.160               | 0.085  | 0.528  | 0.106 | 0.883         |
| P:E                           | 0.155  | 28                | -1.289              | 0.842               | -0.224 | 0.523  | 0.108 | 0.697         |
| H:E:P                         | 1.275  | 28                | -0.792              | 3.357               | 1.282  | 1.016  | 0.006 | 0.268         |
| <b>Lacaniidae (rotifer)</b>   |        |                   |                     |                     |        |        |       |               |
| P                             | 0.890  | 28                | -0.675              | 0.225               | -0.225 | 0.222  | 0.349 | 0.354         |
| H                             | 0.196  | 28                | -0.559              | 0.347               | -0.106 | 0.223  | 0.271 | 0.661         |
| E                             | 0.490  | 28                | -0.618              | 0.284               | -0.167 | 0.222  | 0.309 | 0.489         |
| H:E                           | 0.962  | 28                | -1.357              | 0.421               | -0.468 | 0.437  | 0.028 | 0.335         |
| H:P                           | 0.077  | 28                | -1.031              | 0.765               | -0.133 | 0.442  | 0.020 | 0.783         |
| P:E                           | 0.621  | 28                | -0.512              | 1.264               | 0.376  | 0.437  | 0.031 | 0.437         |
| H:E:P                         | 0.212  | 28                | -2.183              | 1.304               | -0.439 | 0.854  | 0.000 | 0.649         |



**Table S5b:** continued

| Treatment                              | F     | Df <sub>res</sub> | CI <sub>lower</sub> | CI <sub>upper</sub> | ES     | SE (±) | RI    | P             |
|----------------------------------------|-------|-------------------|---------------------|---------------------|--------|--------|-------|---------------|
| <b>Euclanidae (rotifer)</b>            |       |                   |                     |                     |        |        |       |               |
| P                                      | 0.414 | 28                | -0.656              | 0.315               | -0.170 | 0.239  | 0.287 | 0.525         |
| H                                      | 0.005 | 28                | -0.506              | 0.470               | -0.018 | 0.240  | 0.241 | 0.947         |
| E                                      | 0.117 | 28                | -0.578              | 0.397               | -0.090 | 0.240  | 0.254 | 0.735         |
| H:E                                    | 0.289 | 28                | -1.256              | 0.686               | -0.285 | 0.478  | 0.014 | 0.595         |
| H:P                                    | 0.002 | 28                | -0.995              | 0.950               | -0.023 | 0.478  | 0.015 | 0.966         |
| P:E                                    | 0.118 | 28                | -0.787              | 1.152               | 0.182  | 0.477  | 0.016 | 0.734         |
| H:E:P                                  | 0.04  | 28                | -1.724              | 2.149               | 0.213  | 0.948  | 0.000 | 0.842         |
| <b>Lepadellidae (rotifer)</b>          |       |                   |                     |                     |        |        |       |               |
| P                                      | 3.832 | 28                | -1.594              | -0.001              | -0.797 | 0.391  | 0.914 | 0.060         |
| H                                      | 2.074 | 28                | -1.382              | 0.209               | -0.587 | 0.390  | 0.918 | 0.161         |
| E                                      | 0.395 | 28                | -0.532              | 1.044               | 0.256  | 0.387  | 0.845 | 0.535         |
| H:E                                    | 8.244 | 28                | 0.789               | 3.889               | 2.339  | 0.761  | 0.749 | <b>0.008*</b> |
| H:P                                    | 6.444 | 28                | 0.516               | 3.620               | 2.068  | 0.762  | 0.766 | <b>0.017*</b> |
| P:E                                    | 3.423 | 28                | -3.032              | 0.017               | -1.507 | 0.748  | 0.485 | 0.075         |
| H:E:P                                  | 0.316 | 28                | -3.893              | 2.060               | -0.916 | 1.457  | 0.068 | 0.578         |
| <b>Asplanchnidae (rotifer)</b>         |       |                   |                     |                     |        |        |       |               |
| P                                      | 0.895 | 28                | -0.451              | 0.161               | -0.145 | 0.151  | 0.368 | 0.352         |
| H                                      | 1.511 | 28                | -0.493              | 0.116               | -0.188 | 0.150  | 0.448 | 0.229         |
| E                                      | 0.440 | 28                | -0.206              | 0.409               | 0.102  | 0.151  | 0.306 | 0.513         |
| H:E                                    | 1.386 | 28                | -0.959              | 0.237               | -0.361 | 0.294  | 0.052 | 0.249         |
| H:P                                    | 1.942 | 28                | -0.166              | 1.021               | 0.427  | 0.292  | 0.078 | 0.174         |
| P:E                                    | 0.005 | 28                | -0.629              | 0.586               | -0.022 | 0.298  | 0.023 | 0.944         |
| H:E:P                                  | 2.742 | 28                | -0.105              | 2.136               | 1.016  | 0.548  | 0.001 | 0.109         |
| <b>Trichotridae</b>                    |       |                   |                     |                     |        |        |       |               |
| P                                      | 0.128 | 28                | -0.442              | 0.302               | -0.070 | 0.183  | 0.277 | 0.723         |
| H                                      | 3.640 | 28                | 0.007               | 0.742               | 0.374  | 0.181  | 0.710 | 0.067         |
| E                                      | 0.023 | 28                | -0.342              | 0.402               | 0.030  | 0.183  | 0.273 | 0.880         |
| H:E                                    | 0.825 | 28                | -1.084              | 0.371               | -0.357 | 0.358  | 0.058 | 0.371         |
| H:P                                    | 0.109 | 28                | -0.863              | 0.604               | -0.129 | 0.361  | 0.041 | 0.744         |
| P:E                                    | 1.097 | 28                | -0.322              | 1.144               | 0.411  | 0.360  | 0.026 | 0.304         |
| H:E:P                                  | 0.007 | 28                | -1.499              | 1.369               | -0.065 | 0.702  | 0.000 | 0.935         |
| <b>Effects on ecosystem properties</b> |       |                   |                     |                     |        |        |       |               |
| <i>Physico-chemical properties</i>     |       |                   |                     |                     |        |        |       |               |
| <b>UV absorption</b>                   |       |                   |                     |                     |        |        |       |               |
| P                                      | 0.055 | 28                | -0.393              | 0.501               | 0.054  | 0.220  | 0.272 | 0.816         |
| H                                      | 0.109 | 28                | -0.371              | 0.523               | 0.076  | 0.220  | 0.276 | 0.743         |
| E                                      | 0.016 | 28                | -0.417              | 0.475               | 0.029  | 0.220  | 0.271 | 0.901         |
| H:E                                    | 1.690 | 28                | -0.276              | 1.472               | 0.598  | 0.430  | 0.034 | 0.204         |
| H:P                                    | 0.929 | 28                | -0.438              | 1.325               | 0.443  | 0.433  | 0.024 | 0.343         |
| P:E                                    | 2.135 | 28                | -1.542              | 0.199               | -0.672 | 0.428  | 0.042 | 0.155         |
| H:E:P                                  | 0.281 | 28                | -1.192              | 2.167               | 0.488  | 0.822  | 0.000 | 0.600         |

**Table S5b:** continued

| Treatment                            | F       | Df <sub>res</sub> | CI <sub>lower</sub> | CI <sub>upper</sub> | ES     | SE (±) | RI    | P               |
|--------------------------------------|---------|-------------------|---------------------|---------------------|--------|--------|-------|-----------------|
| <b>pH</b>                            |         |                   |                     |                     |        |        |       |                 |
| P                                    | 0.026   | 28                | -0.149              | 0.126               | -0.012 | 0.068  | 0.274 | 0.874           |
| H                                    | 0.218   | 28                | -0.170              | 0.103               | -0.034 | 0.067  | 0.316 | 0.644           |
| E                                    | 70.088  | 28                | -0.738              | -0.463              | -0.600 | 0.068  | 1.000 | < <b>0.001*</b> |
| H:E                                  | 0.939   | 28                | -0.410              | 0.132               | -0.139 | 0.133  | 0.092 | 0.341           |
| H:P                                  | 1.137   | 28                | -0.422              | 0.116               | -0.153 | 0.132  | 0.029 | 0.295           |
| P:E                                  | 0.218   | 28                | -0.341              | 0.207               | -0.067 | 0.135  | 0.058 | 0.644           |
| H:E:P                                | 1.228   | 28                | -0.206              | 0.842               | 0.318  | 0.257  | 0.000 | 0.277           |
| <b>Dissolved O<sub>2</sub></b>       |         |                   |                     |                     |        |        |       |                 |
| P                                    | 2.363   | 28                | -0.080              | 0.711               | 0.316  | 0.195  | 0.572 | 0.135           |
| H                                    | 1.526   | 28                | -0.143              | 0.650               | 0.254  | 0.195  | 0.464 | 0.227           |
| E                                    | 31.753  | 28                | -1.558              | -0.755              | -1.157 | 0.198  | 1.000 | < <b>0.001*</b> |
| H:E                                  | 0.010   | 28                | -0.835              | 0.753               | -0.041 | 0.390  | 0.079 | 0.921           |
| H:P                                  | 0.954   | 28                | -1.176              | 0.374               | -0.401 | 0.381  | 0.088 | 0.337           |
| P:E                                  | 0.170   | 28                | -0.960              | 0.622               | -0.169 | 0.389  | 0.118 | 0.684           |
| H:E:P                                | 2.304   | 28                | -0.254              | 2.746               | 1.246  | 0.734  | 0.002 | 0.140           |
| <b>Conductivity</b>                  |         |                   |                     |                     |        |        |       |                 |
| P                                    | 0.674   | 28                | -2.538              | 6.388               | 1.925  | 2.196  | 0.267 | 0.419           |
| H                                    | 1.753   | 28                | -7.518              | 1.308               | -3.105 | 2.172  | 0.578 | 0.196           |
| E                                    | 105.187 | 28                | 19.559              | 28.551              | 24.055 | 2.214  | 1.000 | < <b>0.001*</b> |
| H:E                                  | 2.183   | 28                | -1.728              | 15.588              | 6.930  | 4.258  | 0.344 | 0.151           |
| H:P                                  | 0.286   | 28                | -6.236              | 11.256              | 2.510  | 4.295  | 0.042 | 0.597           |
| P:E                                  | 0.101   | 28                | -10.425             | 7.444               | -1.490 | 4.392  | 0.067 | 0.753           |
| H:E:P                                | 0.038   | 28                | -18.957             | 15.317              | -1.820 | 8.391  | 0.000 | 0.848           |
| <i>Final nutrient concentrations</i> |         |                   |                     |                     |        |        |       |                 |
| <b>Dissolved pelagic Phosphorus</b>  |         |                   |                     |                     |        |        |       |                 |
| P                                    | 1.318   | 28                | -0.096              | 0.024               | -0.036 | 0.030  | 0.456 | 0.261           |
| H                                    | 0.070   | 28                | -0.053              | 0.069               | 0.008  | 0.030  | 0.133 | 0.793           |
| E                                    | 1.318   | 28                | -0.024              | 0.096               | 0.036  | 0.030  | 0.456 | 0.261           |
| H:E                                  | 0.582   | 28                | -0.072              | 0.167               | 0.048  | 0.059  | 0.032 | 0.452           |
| H:P                                  | 0.582   | 28                | -0.167              | 0.072               | -0.048 | 0.059  | 0.032 | 0.452           |
| P:E                                  | 2.709   | 28                | -0.218              | 0.013               | -0.102 | 0.057  | 0.264 | 0.111           |
| H:E:P                                | 0.070   | 28                | -0.260              | 0.194               | -0.033 | 0.111  | 0.000 | 0.793           |
| <b>Total pelagic phosphorus</b>      |         |                   |                     |                     |        |        |       |                 |
| P                                    | 1.452   | 28                | -1.179              | 5.085               | 1.953  | 1.542  | 0.474 | 0.238           |
| H                                    | 4.324   | 28                | -6.507              | -0.234              | -3.370 | 1.545  | 0.770 | <b>0.047</b>    |
| E                                    | 0.067   | 28                | -2.756              | 3.596               | 0.420  | 1.563  | 0.149 | 0.797           |
| H:E                                  | 0.324   | 28                | -8.097              | 4.409               | -1.844 | 3.074  | 0.047 | 0.574           |
| H:P                                  | 1.679   | 28                | -10.299             | 1.899               | -4.200 | 3.000  | 0.268 | 0.206           |
| P:E                                  | 0.246   | 28                | -4.641              | 7.855               | 1.607  | 3.070  | 0.027 | 0.624           |
| H:E:P                                | 1.678   | 28                | -20.241             | 3.445               | -8.398 | 5.799  | 0.001 | 0.206           |

**Table S5b:** continued

| Treatment                         | F      | Df <sub>res</sub> | CI <sub>lower</sub> | CI <sub>upper</sub> | ES       | SE (±)  | RI    | P             |
|-----------------------------------|--------|-------------------|---------------------|---------------------|----------|---------|-------|---------------|
| <b>Total benthic phosphorus</b>   |        |                   |                     |                     |          |         |       |               |
| P                                 | 0.078  | 28                | -161.529            | 119.027             | -21.251  | 69.004  | 0.950 | 0.783         |
| H                                 | 0.048  | 28                | -159.960            | 126.545             | -16.707  | 70.416  | 0.257 | 0.828         |
| E                                 | 4.541  | 28                | 20.875              | 304.442             | 162.659  | 69.758  | 0.876 | <b>0.042</b>  |
| H:E                               | 0.005  | 28                | -273.361            | 295.763             | 11.201   | 139.716 | 0.041 | 0.942         |
| H:P                               | 0.078  | 28                | -238.187            | 323.583             | 42.698   | 137.875 | 0.043 | 0.782         |
| P:E                               | 9.205  | 28                | -741.576            | -184.812            | -463.194 | 136.928 | 0.840 | <b>0.005*</b> |
| H:E:P                             | 0.041  | 28                | -619.302            | 496.174             | -61.564  | 273.097 | 0.001 | 0.842         |
| <b>Dissolved pelagic nitrogen</b> |        |                   |                     |                     |          |         |       |               |
| P                                 | 0.669  | 28                | -21.291             | 8.665               | -6.313   | 7.371   | 0.364 | 0.420         |
| H                                 | 9.266  | 28                | -38.550             | -8.442              | -23.496  | 7.415   | 0.966 | <b>0.005*</b> |
| E                                 | 1.034  | 28                | -22.786             | 7.091               | -7.848   | 7.352   | 0.409 | 0.318         |
| H:E                               | 1.066  | 28                | -13.492             | 45.365              | 15.937   | 14.472  | 0.120 | 0.311         |
| H:P                               | 1.086  | 28                | -13.411             | 45.594              | 16.091   | 14.507  | 0.107 | 0.306         |
| P:E                               | 0.015  | 28                | -27.704             | 31.533              | 1.915    | 14.549  | 0.028 | 0.902         |
| H:E:P                             | 1.353  | 28                | -92.318             | 20.480              | -35.919  | 27.616  | 0.001 | 0.255         |
| <b>Total pelagic nitrogen</b>     |        |                   |                     |                     |          |         |       |               |
| P                                 | 0.089  | 28                | -26.328             | 19.439              | -3.444   | 11.258  | 0.294 | 0.768         |
| H                                 | 6.940  | 28                | -53.285             | -7.567              | -30.426  | 11.257  | 0.918 | <b>0.014*</b> |
| E                                 | 0.411  | 28                | -29.929             | 15.121              | -7.404   | 11.083  | 0.476 | 0.527         |
| H:E                               | 3.765  | 28                | 1.000               | 88.647              | 44.824   | 21.552  | 0.314 | 0.062         |
| H:P                               | 1.742  | 28                | -14.169             | 75.148              | 30.489   | 21.953  | 0.110 | 0.198         |
| P:E                               | 0.356  | 28                | -58.326             | 30.757              | -13.784  | 21.869  | 0.033 | 0.555         |
| H:E:P                             | 0.545  | 28                | -118.492            | 50.290              | -34.101  | 41.322  | 0.002 | 0.467         |
| <b>Ammonium <math>NH_4</math></b> |        |                   |                     |                     |          |         |       |               |
| P                                 | 0.011  | 28                | -2.818              | 3.138               | 0.160    | 1.466   | 0.260 | 0.915         |
| H                                 | < 0.01 | 28                | -2.955              | 3.003               | 0.024    | 1.467   | 0.257 | 0.987         |
| E                                 | 5.017  | 28                | -6.281              | -0.407              | -3.344   | 1.447   | 0.790 | <b>0.033</b>  |
| H:E                               | 0.061  | 28                | -5.132              | 6.608               | 0.738    | 2.887   | 0.042 | 0.807         |
| H:P                               | 0.778  | 28                | -3.253              | 8.521               | 2.634    | 2.893   | 0.019 | 0.385         |
| P:E                               | 0.202  | 28                | -7.200              | 4.516               | -1.342   | 2.881   | 0.045 | 0.657         |
| H:E:P                             | 3.873  | 28                | -22.660             | -0.844              | -11.752  | 5.341   | 0.001 | 0.059         |
| <b>Dissolved Organic Carbon</b>   |        |                   |                     |                     |          |         |       |               |
| P                                 | 0.140  | 28                | -0.846              | 0.565               | -0.141   | 0.348   | 0.258 | 0.711         |
| H                                 | 0.882  | 28                | -0.347              | 1.053               | 0.353    | 0.345   | 0.351 | 0.356         |
| E                                 | 0.645  | 28                | -1.003              | 0.399               | -0.302   | 0.345   | 0.323 | 0.429         |
| H:E                               | 0.582  | 28                | -1.952              | 0.806               | -0.573   | 0.678   | 0.032 | 0.452         |
| H:P                               | 0.006  | 28                | -1.457              | 1.342               | -0.058   | 0.688   | 0.019 | 0.939         |
| P:E                               | 0.178  | 28                | -1.716              | 1.081               | -0.317   | 0.688   | 0.019 | 0.676         |
| H:E:P                             | 0.212  | 28                | -2.055              | 3.439               | 0.692    | 1.345   | 0.000 | 0.649         |

**Table S5b:** continued

| Treatment                       | F      | Df <sub>res</sub> | CI <sub>lower</sub> | CI <sub>upper</sub> | ES         | SE (±)    | RI    | P                 |
|---------------------------------|--------|-------------------|---------------------|---------------------|------------|-----------|-------|-------------------|
| <i>Biological parameters</i>    |        |                   |                     |                     |            |           |       |                   |
| <b>Zooplankton average size</b> |        |                   |                     |                     |            |           |       |                   |
| P                               | 3.403  | 28                | -0.837              | 0.027               | -0.405     | 0.212     | 0.694 | 0.076             |
| H                               | 4.738  | 28                | -0.913              | -0.044              | -0.478     | 0.214     | 0.883 | <b>0.038</b>      |
| E                               | 0.408  | 28                | -0.567              | 0.287               | -0.140     | 0.210     | 0.688 | 0.528             |
| H:E                             | 6.605  | 28                | 0.294               | 1.964               | 1.129      | 0.411     | 0.573 | <b>0.016*</b>     |
| H:P                             | 1.396  | 28                | -0.320              | 1.359               | 0.519      | 0.412     | 0.204 | 0.247             |
| P:E                             | 0.660  | 28                | -1.188              | 0.475               | -0.357     | 0.408     | 0.120 | 0.424             |
| H:E:P                           | 0.089  | 28                | -1.343              | 1.867               | 0.262      | 0.786     | 0.005 | 0.768             |
| <b>Pelagic chlorophyll a</b>    |        |                   |                     |                     |            |           |       |                   |
| P                               | 0.399  | 28                | -0.231              | 0.468               | 0.118      | 0.172     | 0.301 | 0.533             |
| H                               | 0.036  | 28                | -0.315              | 0.386               | 0.036      | 0.173     | 0.257 | 0.85              |
| E                               | 2.863  | 28                | -0.663              | 0.029               | -0.317     | 0.170     | 0.628 | 0.102             |
| H:E                             | 0.367  | 28                | -0.916              | 0.462               | -0.227     | 0.339     | 0.039 | 0.55              |
| H:P                             | 0.001  | 28                | -0.688              | 0.711               | 0.012      | 0.344     | 0.015 | 0.975             |
| P:E                             | 0.432  | 28                | -0.932              | 0.439               | -0.246     | 0.337     | 0.048 | 0.516             |
| H:E:P                           | 0.006  | 28                | -1.427              | 1.312               | -0.057     | 0.670     | 0.000 | 0.939             |
| <b>Benthic chlorophyll a</b>    |        |                   |                     |                     |            |           |       |                   |
| P                               | 0.554  | 28                | -0.534              | 0.237               | -0.148     | 0.190     | 0.294 | 0.463             |
| H                               | 0.755  | 28                | -0.207              | 0.553               | 0.173      | 0.187     | 0.502 | 0.392             |
| E                               | 43.534 | 28                | -1.702              | -0.928              | -1.315     | 0.191     | 1.000 | <b>&lt;0.001*</b> |
| H:E                             | 3.156  | 28                | -1.454              | 0.038               | -0.708     | 0.367     | 0.322 | 0.087             |
| H:P                             | 0.005  | 28                | -0.731              | 0.784               | 0.027      | 0.372     | 0.030 | 0.947             |
| P:E                             | 0.190  | 28                | -0.944              | 0.596               | -0.174     | 0.378     | 0.066 | 0.666             |
| H:E:P                           | 1.088  | 28                | -2.287              | 0.625               | -0.831     | 0.713     | 0.001 | 0.306             |
| <b>LNA (small) bacteria</b>     |        |                   |                     |                     |            |           |       |                   |
| P                               | 0.323  | 28                | -12450.075          | 7145.400            | -2652.338  | 4819.114  | 0.479 | 0.574             |
| H                               | 2.127  | 28                | -16661.385          | 3055.660            | -6802.863  | 4851.024  | 0.609 | 0.156             |
| E                               | 0.131  | 28                | -8139.602           | 11519.610           | 1690.004   | 4834.177  | 0.281 | 0.720             |
| H:E                             | 3.358  | 28                | -1540.376           | 35730.093           | 17094.858  | 9149.112  | 0.173 | 0.078             |
| H:P                             | 5.262  | 28                | 2597.050            | 40200.967           | 21399.008  | 9237.427  | 0.395 | <b>0.030</b>      |
| P:E                             | 2.885  | 28                | -2569.672           | 34262.088           | 15846.208  | 9036.201  | 0.134 | 0.100             |
| H:E:P                           | 3.766  | 28                | -70291.674          | -2128.093           | -36209.883 | 16688.170 | 0.044 | 0.062             |
| <b>HNA (big) bacteria</b>       |        |                   |                     |                     |            |           |       |                   |
| P                               | 0.983  | 28                | -1232.979           | 3867.779            | 1317.400   | 1254.563  | 0.375 | 0.330             |
| H                               | 0.716  | 28                | -3633.085           | 1384.018            | -1124.533  | 1234.090  | 0.952 | 0.405             |
| E                               | 7.549  | 28                | -6211.264           | -1090.736           | -3651.000  | 1260.436  | 0.603 | <b>0.010*</b>     |
| H:E                             | 4.486  | 28                | 724.204             | 10534.062           | 5629.133   | 2412.134  | 0.442 | <b>0.043</b>      |
| H:P                             | 0.009  | 28                | -5229.036           | 4728.370            | -250.333   | 2444.572  | 0.041 | 0.926             |
| P:E                             | 0.236  | 28                | -3779.302           | 6361.302            | 1291.000   | 2491.762  | 0.074 | 0.631             |

**Table S5b:** continued

| <b>Treatment</b>                   | <b>F</b> | <b>Df<sub>res</sub></b> | <b>CI<sub>lower</sub></b> | <b>CI<sub>upper</sub></b> | <b>ES</b> | <b>SE (±)</b> | <b>RI</b> | <b>P</b> |
|------------------------------------|----------|-------------------------|---------------------------|---------------------------|-----------|---------------|-----------|----------|
| H:E:P                              | < 0.01   | 28                      | -9785.789                 | 9632.722                  | -76.533   | 4754.143      | 0.001     | 0.989    |
| <i>Ecosystem processes</i>         |          |                         |                           |                           |           |               |           |          |
| <b>Gross Primary Productivity</b>  |          |                         |                           |                           |           |               |           |          |
| P                                  | 0.062    | 28                      | -320.658                  | 415.678                   | 47.510    | 181.359       | 0.255     | 0.805    |
| H                                  | 0.687    | 28                      | -206.523                  | 522.543                   | 158.010   | 179.571       | 0.354     | 0.414    |
| E                                  | 0.190    | 28                      | -448.851                  | 282.795                   | -83.028   | 180.192       | 0.295     | 0.666    |
| H:E                                | 2.405    | 28                      | -114.344                  | 1296.572                  | 591.114   | 346.971       | 0.066     | 0.132    |
| H:P                                | 0.954    | 28                      | -347.672                  | 1092.127                  | 372.227   | 354.001       | 0.030     | 0.337    |
| P:E                                | 0.001    | 28                      | -742.831                  | 720.773                   | -11.029   | 359.779       | 0.015     | 0.977    |
| H:E:P                              | 0.079    | 28                      | -1607.177                 | 1177.742                  | -214.717  | 681.819       | 0.000     | 0.78     |
| <b>Ecosystem Respiration</b>       |          |                         |                           |                           |           |               |           |          |
| P                                  | 0.107    | 28                      | -306.559                  | 425.350                   | 59.395    | 180.182       | 0.357     | 0.746    |
| H                                  | 0.077    | 28                      | -312.896                  | 413.614                   | 50.359    | 178.836       | 0.303     | 0.784    |
| E                                  | 1.070    | 28                      | -175.843                  | 551.440                   | 187.799   | 179.076       | 0.412     | 0.310    |
| H:E                                | 3.510    | 28                      | -15.540                   | 1376.192                  | 680.326   | 342.131       | 0.118     | 0.071    |
| H:P                                | 3.232    | 28                      | -45.820                   | 1351.322                  | 652.751   | 343.354       | 0.082     | 0.083    |
| P:E                                | 0.285    | 28                      | -521.740                  | 909.674                   | 193.967   | 351.699       | 0.030     | 0.597    |
| H:E:P                              | 0.302    | 28                      | -1725.360                 | 927.752                   | -398.804  | 649.549       | 0.001     | 0.587    |
| <b>Carbon-oxygen mass exchange</b> |          |                         |                           |                           |           |               |           |          |
| P                                  | 0.570    | 28                      | -66.403                   | 145.384                   | 39.491    | 52.088        | 0.474     | 0.457    |
| H                                  | 0.023    | 28                      | -98.218                   | 114.075                   | 7.929     | 52.202        | 0.212     | 0.881    |
| E                                  | 19.737   | 28                      | -340.522                  | -124.196                  | -232.359  | 53.265        | 0.998     | <0.001*  |
| H:E                                | 0.218    | 28                      | -259.781                  | 162.177                   | -48.802   | 103.653       | 0.077     | 0.644    |
| H:P                                | 4.246    | 28                      | -418.137                  | -12.954                   | -215.546  | 99.493        | 0.151     | 0.049    |
| P:E                                | 2.412    | 28                      | -369.929                  | 45.006                    | -162.462  | 101.982       | 0.362     | 0.132    |
| H:E:P                              | 2.297    | 28                      | -65.070                   | 699.238                   | 317.084   | 187.122       | 0.007     | 0.141    |
| <b>Ecosystem Respiration 20°C</b>  |          |                         |                           |                           |           |               |           |          |
| P                                  | 0.102    | 28                      | -17.502                   | 24.027                    | 3.262     | 10.223        | 0.370     | 0.752    |
| H                                  | 0.054    | 28                      | -18.225                   | 22.998                    | 2.387     | 10.146        | 0.313     | 0.817    |
| E                                  | 1.022    | 28                      | -10.303                   | 31.006                    | 10.352    | 10.170        | 0.416     | 0.321    |
| H:E                                | 3.821    | 28                      | 0.590                     | 79.469                    | 40.030    | 19.389        | 0.132     | 0.061    |
| H:P                                | 3.550    | 28                      | -0.953                    | 78.115                    | 38.581    | 19.430        | 0.095     | 0.070    |
| P:E                                | 0.424    | 28                      | -27.101                   | 53.777                    | 13.338    | 19.869        | 0.033     | 0.520    |
| H:E:P                              | 0.371    | 28                      | -99.749                   | 49.871                    | -24.939   | 36.631        | 0.001     | 0.547    |
| <b>Bacterial Respiration 16°C</b>  |          |                         |                           |                           |           |               |           |          |
| P                                  | 0.075    | 28                      | -0.005                    | 0.007                     | 0.001     | 0.003         | 0.294     | 0.786    |
| H                                  | 1.336    | 28                      | -0.002                    | 0.010                     | 0.004     | 0.003         | 0.416     | 0.257    |
| E                                  | 0.879    | 28                      | -0.003                    | 0.009                     | 0.003     | 0.003         | 0.360     | 0.356    |
| H:E                                | 0.568    | 28                      | -0.007                    | 0.016                     | 0.005     | 0.006         | 0.045     | 0.457    |
| H:P                                | 1.747    | 28                      | -0.004                    | 0.020                     | 0.008     | 0.006         | 0.055     | 0.197    |

**Table S5b:** continued

| <b>Treatment</b>                       | <b>F</b> | <b>Df<sub>res</sub></b> | <b>CI<sub>lower</sub></b> | <b>CI<sub>upper</sub></b> | <b>ES</b> | <b>SE (±)</b> | <b>RI</b> | <b>P</b>      |
|----------------------------------------|----------|-------------------------|---------------------------|---------------------------|-----------|---------------|-----------|---------------|
| P:E                                    | 1.628    | 28                      | -0.020                    | 0.004                     | -0.008    | 0.006         | 0.040     | 0.213         |
| H:E:P                                  | 0.084    | 28                      | -0.019                    | 0.026                     | 0.004     | 0.011         | 0.000     | 0.774         |
| <b>Sedimentation</b>                   |          |                         |                           |                           |           |               |           |               |
| P                                      | 0.346    | 28                      | -0.417                    | 0.215                     | -0.101    | 0.156         | 0.279     | 0.561         |
| H                                      | 0.004    | 28                      | -0.328                    | 0.306                     | -0.011    | 0.156         | 0.241     | 0.949         |
| E                                      | 0.020    | 28                      | -0.341                    | 0.293                     | -0.024    | 0.156         | 0.241     | 0.890         |
| H:E                                    | 0.057    | 28                      | -0.717                    | 0.553                     | -0.082    | 0.312         | 0.012     | 0.813         |
| H:P                                    | 0.262    | 28                      | -0.454                    | 0.806                     | 0.176     | 0.310         | 0.016     | 0.612         |
| P:E                                    | 0.029    | 28                      | -0.574                    | 0.690                     | 0.058     | 0.311         | 0.014     | 0.867         |
| H:E:P                                  | 0.381    | 28                      | -1.679                    | 0.831                     | -0.424    | 0.615         | 0.000     | 0.542         |
| <b>Light diffusion (K<sub>a</sub>)</b> |          |                         |                           |                           |           |               |           |               |
| P                                      | < 0.01   | 28                      | -0.153                    | 0.154                     | 0.000     | 0.076         | 0.185     | 0.997         |
| H                                      | 1.096    | 28                      | -0.066                    | 0.235                     | 0.084     | 0.074         | 0.464     | 0.304         |
| E                                      | 6.782    | 28                      | 0.058                     | 0.362                     | 0.210     | 0.075         | 0.925     | <b>0.015*</b> |
| H:E                                    | 1.837    | 28                      | -0.513                    | 0.076                     | -0.219    | 0.145         | 0.257     | 0.186         |
| H:P                                    | 0.104    | 28                      | -0.354                    | 0.250                     | -0.052    | 0.148         | 0.023     | 0.750         |
| P:E                                    | 0.031    | 28                      | -0.277                    | 0.334                     | 0.029     | 0.150         | 0.046     | 0.861         |
| H:E:P                                  | 0.019    | 28                      | -0.545                    | 0.635                     | 0.045     | 0.289         | 0.000     | 0.890         |

**Table S6: Introduction and survival of phase 2 fish.** Two cohorts of juvenile fish (i.e. lake, hybrids, and stream) were added to each tank after removing the adult fish (i.e. lake and stream) of phase 1. Survival of juveniles at the end of phase 2 is shown for each tank.

| Tank | Block | <i>1<sup>st</sup></i> cohort introduced |                     |                     |                | <i>2<sup>nd</sup></i> cohort introduced |                     |                     |                | Total <sub>1</sub> | Survival |        |        |              |       | Phase 1 treatment |    |    |        |
|------|-------|-----------------------------------------|---------------------|---------------------|----------------|-----------------------------------------|---------------------|---------------------|----------------|--------------------|----------|--------|--------|--------------|-------|-------------------|----|----|--------|
|      |       | Lake <sub>1</sub>                       | Hybrid <sub>1</sub> | Stream <sub>1</sub> | N <sub>1</sub> | Lake <sub>2</sub>                       | Hybrid <sub>2</sub> | Stream <sub>2</sub> | N <sub>2</sub> | N <sub>1+2</sub>   | Lake     | Hybrid | Stream | Unidentified | Total | H                 | E  | P  | Sex    |
| 1    | 1     | 2                                       | 2                   | 4                   | 8              | 4                                       | 8                   | 4                   | 16             | 24                 | 0        | 5      | 4      | 0            | 9     | Lake              | +N | +P | Female |
| 2    | 1     | 2                                       | 1                   | 3                   | 5              | 4                                       | 8                   | 4                   | 16             | 21                 | 2        | 4      | 4      | 4            | 14    | Lake              | -N | -P | Female |
| 3    | 1     | 3                                       | 0                   | 2                   | 3              | 4                                       | 8                   | 4                   | 16             | 19                 | 0        | 4      | 5      | 2            | 11    | Stream            | -N | -P | Female |
| 4    | 1     | 3                                       | 2                   | 4                   | 7              | 4                                       | 8                   | 4                   | 16             | 23                 | 3        | 4      | 11     | 5            | 23    | Stream            | +N | +P | Female |
| 5    | 4     | 2                                       | 1                   | 3                   | 5              | 4                                       | 8                   | 4                   | 16             | 21                 | 1        | 8      | 4      | 3            | 16    | Lake              | +N | -P | Female |
| 6    | 1     | 3                                       | 5                   | 7                   | 10             | 4                                       | 8                   | 4                   | 16             | 26                 | 1        | 3      | 8      | 2            | 14    | Stream            | -N | +P | Female |
| 7    | 1     | 0                                       | 3                   | 5                   | 11             | 4                                       | 8                   | 4                   | 16             | 27                 | 1        | 2      | 9      | 1            | 13    | Lake              | -N | +P | Female |
| 8    | 1     | 4                                       | 0                   | 2                   | 6              | 4                                       | 8                   | 4                   | 16             | 22                 | 1        | 4      | 4      | 1            | 10    | Lake              | +N | -P | Female |
| 9    | 2     | 0                                       | 8                   | 10                  | 9              | 4                                       | 8                   | 4                   | 16             | 25                 | 2        | 5      | 4      | 4            | 15    | Stream            | -N | +P | Male   |
| 10   | 2     | 3                                       | 5                   | 7                   | 11             | 4                                       | 8                   | 4                   | 16             | 27                 | 0        | 3      | 9      | 1            | 13    | Lake              | +N | -P | Male   |
| 11   | 2     | 4                                       | 8                   | 10                  | 15             | 4                                       | 8                   | 4                   | 16             | 31                 | 2        | 5      | 7      | 1            | 15    | Lake              | +N | +P | Male   |
| 12   | 2     | 2                                       | 4                   | 6                   | 11             | 4                                       | 8                   | 4                   | 16             | 27                 | 1        | 10     | 9      | 1            | 21    | Lake              | -N | -P | Male   |
| 13   | 2     | 5                                       | 7                   | 9                   | 21             | 4                                       | 8                   | 4                   | 16             | 37                 | 1        | 5      | 8      | 2            | 16    | Stream            | +N | +P | Male   |
| 14   | 2     | 7                                       | 6                   | 8                   | 23             | 4                                       | 8                   | 4                   | 16             | 39                 | 2        | 4      | 4      | 3            | 13    | Lake              | -N | +P | Male   |
| 15   | 2     | 3                                       | 8                   | 10                  | 17             | 4                                       | 8                   | 4                   | 16             | 33                 | 1        | 5      | 7      | 3            | 16    | Stream            | +N | -P | Male   |
| 16   | 2     | 6                                       | 5                   | 7                   | 20             | 4                                       | 8                   | 4                   | 16             | 36                 | 0        | 1      | 1      | 2            | 4     | Stream            | -N | -P | Male   |
| 17   | 3     | 1                                       | 2                   | 4                   | 11             | 4                                       | 8                   | 4                   | 16             | 27                 | 2        | 2      | 4      | 3            | 11    | Stream            | +N | +P | Male   |
| 18   | 3     | 5                                       | 6                   | 8                   | 14             | 4                                       | 8                   | 4                   | 16             | 30                 | 6        | 2      | 3      | 1            | 12    | Stream            | -N | -P | Male   |
| 19   | 3     | 0                                       | 3                   | 5                   | 6              | 4                                       | 8                   | 4                   | 16             | 22                 | 4        | 0      | 1      | 4            | 9     | Stream            | -N | +P | Male   |
| 20   | 3     | 1                                       | 4                   | 6                   | 12             | 4                                       | 8                   | 4                   | 16             | 28                 | 4        | 1      | 4      | 1            | 10    | Lake              | -N | -P | Male   |
| 21   | 3     | 0                                       | 8                   | 10                  | 18             | 4                                       | 8                   | 4                   | 16             | 34                 | 5        | 4      | 6      | 4            | 19    | Stream            | +N | -P | Male   |
| 22   | 3     | 2                                       | 8                   | 10                  | 20             | 4                                       | 8                   | 4                   | 16             | 36                 | 0        | 2      | 4      | 7            | 13    | Lake              | -N | +P | Male   |
| 23   | 3     | 0                                       | 4                   | 6                   | 13             | 4                                       | 8                   | 4                   | 16             | 29                 | 0        | 4      | 2      | 2            | 8     | Lake              | +N | -P | Male   |
| 24   | 3     | 2                                       | 4                   | 6                   | 13             | 4                                       | 8                   | 4                   | 16             | 29                 | 2        | 3      | 4      | 2            | 11    | Lake              | +N | +P | Male   |
| 25   | 1     | 1                                       | 3                   | 5                   | 8              | 4                                       | 8                   | 4                   | 16             | 24                 | 2        | 0      | 9      | 2            | 13    | Stream            | +N | -P | Female |
| 26   | 4     | 1                                       | 3                   | 5                   | 5              | 4                                       | 8                   | 4                   | 16             | 21                 | 1        | 6      | 1      | 3            | 11    | Stream            | -N | +P | Female |
| 27   | 4     | 3                                       | 2                   | 4                   | 8              | 4                                       | 8                   | 4                   | 16             | 24                 | 0        | 6      | 4      | 4            | 14    | Stream            | +N | +P | Female |
| 28   | 4     | 4                                       | 3                   | 5                   | 6              | 4                                       | 8                   | 4                   | 16             | 22                 | 5        | 8      | 0      | 0            | 13    | Stream            | -N | -P | Female |
| 29   | 4     | 1                                       | 4                   | 6                   | 9              | 4                                       | 8                   | 4                   | 16             | 25                 | 0        | 0      | 0      |              |       | Lake              | -N | -P | Female |
| 30   | 4     | 5                                       | 3                   | 5                   | 12             | 4                                       | 8                   | 4                   | 16             | 28                 | 2        | 6      | 2      | 2            | 12    | Lake              | -N | +P | Female |
| 31   | 4     | 2                                       | 0                   | 2                   | 6              | 4                                       | 8                   | 4                   | 16             | 22                 | 1        | 5      | 3      | 3            | 12    | Stream            | +N | -P | Female |
| 32   | 4     | 1                                       | 1                   | 3                   | 6              | 4                                       | 8                   | 4                   | 16             | 22                 | 5        | 9      | 4      | 0            | 18    | Lake              | +N | +P | Female |
| 33   | 5     | 0                                       | 3                   | 5                   | 8              | 4                                       | 8                   | 4                   | 16             | 24                 | 1        | 2      | 4      | 2            | 9     | Lake              | -N | -P | Male   |
| 34   | 5     | 6                                       | 2                   | 4                   | 9              | 4                                       | 8                   | 4                   | 16             | 25                 | 5        | 3      | 9      | 1            | 18    | Lake              | +N | +P | Male   |
| 35   | 5     | 0                                       | 3                   | 5                   | 10             | 4                                       | 8                   | 4                   | 16             | 26                 | 3        | 7      | 6      | 2            | 18    | Stream            | +N | -P | Male   |
| 36   | 5     | 6                                       | 1                   | 3                   | 7              | 4                                       | 8                   | 4                   | 16             | 23                 | 1        | 4      | 2      | 2            | 9     | Lake              | -N | +P | Male   |
| 37   | 5     | 2                                       | 4                   | 6                   | 11             | 4                                       | 8                   | 4                   | 16             | 27                 | 0        | 2      | 7      | 2            | 11    | Stream            | -N | -P | Male   |
| 38   | 5     | 3                                       | 1                   | 3                   | 9              | 4                                       | 8                   | 4                   | 16             | 25                 | 1        | 4      | 2      | 4            | 11    | Lake              | +N | -P | Male   |
| 39   | 5     | 2                                       | 3                   | 5                   | 9              | 4                                       | 8                   | 4                   | 16             | 25                 | 1        | 4      | 5      | 1            | 11    | Stream            | -N | +P | Male   |
| 40   | 5     | 2                                       | 3                   | 5                   | 8              | 4                                       | 8                   | 4                   | 16             | 24                 | 4        | 5      | 0      | 3            | 12    | Stream            | +N | +P | Male   |

**Table S7: Effects of phase 1 on survival, selection and body condition of juveniles in phase 2.** Effects on survival and selection tested by GLMMs. Treatments correspond to the effects of host (H), environment (E), parasite exposure (P), and their interactions (e.g. HxE). Significant P values are highlighted in bold.

| Juvenile Group | Factor | Survival       |    |              | Selection      |    |              | Infection intensity |    |       | Condition |                   |              |
|----------------|--------|----------------|----|--------------|----------------|----|--------------|---------------------|----|-------|-----------|-------------------|--------------|
|                |        | X <sup>2</sup> | Df | P            | X <sup>2</sup> | Df | P            | X <sup>2</sup>      | Df | P     | F         | Df <sub>res</sub> | P            |
| All            | P      | 0.084          | 1  | 0.771        |                |    |              | 1.815               | 1  | 0.178 |           |                   |              |
|                | H      | 0.242          | 1  | 0.622        |                |    |              | 2.027               | 1  | 0.155 |           |                   |              |
|                | E      | 3.697          | 1  | 0.055        |                |    |              | 0.46                | 1  | 0.498 |           |                   |              |
|                | P:H    | 1.197          | 1  | 0.274        |                |    |              | 1.819               | 1  | 0.177 |           |                   |              |
|                | P:E    | 0.607          | 1  | 0.436        |                |    |              | 0.333               | 1  | 0.564 |           |                   |              |
|                | H:E    | 0.816          | 1  | 0.366        |                |    |              | 0.392               | 1  | 0.531 |           |                   |              |
|                | P:H:E  | 3.177          | 1  | 0.075        |                |    |              | 0.395               | 1  | 0.530 |           |                   |              |
| Lake           | P      | 0.31           | 1  | 0.578        | 0.174          | 1  | 0.677        |                     |    |       | 0.003     | 18.493            | 0.955        |
|                | H      | 1.609          | 1  | 0.205        | 1.145          | 1  | 0.285        |                     |    |       | 2.183     | 18.06             | 0.157        |
|                | E      | 0.234          | 1  | 0.628        | 0.005          | 1  | 0.943        |                     |    |       | 0.273     | 18.406            | 0.607        |
|                | P:H    | 0.001          | 1  | 0.979        | 0.083          | 1  | 0.774        |                     |    |       | 2.897     | 19.86             | 0.104        |
|                | P:E    | 0.92           | 1  | 0.338        | 0.521          | 1  | 0.471        |                     |    |       | 0.789     | 17.362            | 0.387        |
|                | H:E    | 0.108          | 1  | 0.743        | 0.351          | 1  | 0.554        |                     |    |       | 0.538     | 19.458            | 0.472        |
|                | P:H:E  | 4.835          | 1  | <b>0.028</b> | 6.109          | 1  | <b>0.013</b> |                     |    |       | 1.065     | 18.899            | 0.315        |
| Hybrids        | P      | 0.198          | 1  | 0.656        | 0.014          | 1  | 0.904        | 1.482               | 1  | 0.223 | 0.006     | 16.028            | 0.938        |
|                | H      | 0.084          | 1  | 0.771        | 2.988          | 1  | 0.084        | 1.245               | 1  | 0.264 | 0.655     | 16.87             | 0.430        |
|                | E      | 4.358          | 1  | <b>0.037</b> | 0.25           | 1  | 0.617        | 0.979               | 1  | 0.322 | 0.147     | 17.011            | 0.706        |
|                | P:H    | 1.622          | 1  | 0.203        | 0.007          | 1  | 0.933        | 1.335               | 1  | 0.248 | 2.086     | 16.788            | 0.167        |
|                | P:E    | 0.007          | 1  | 0.932        | 0.051          | 1  | 0.821        | 0.825               | 1  | 0.364 | 17.606    | 16.613            | <b>0.001</b> |
|                | H:E    | 0.164          | 1  | 0.686        | 0.247          | 1  | 0.619        | 0.881               | 1  | 0.348 | 1.477     | 19.173            | 0.239        |
|                | P:H:E  | 0.722          | 1  | 0.396        | 0.676          | 1  | 0.411        | 0.749               | 1  | 0.387 | 0.063     | 17.901            | 0.804        |
| Stream         | P      | 0.164          | 1  | 0.685        | 0.038          | 1  | 0.845        | 0.963               | 1  | 0.326 | 2.248     | 18.156            | 0.151        |
|                | H      | 0.606          | 1  | 0.436        | 2.014          | 1  | 0.156        | 0.761               | 1  | 0.383 | 4.127     | 18.711            | 0.057        |
|                | E      | 1.815          | 1  | 0.178        | 0.948          | 1  | 0.330        | 0.772               | 1  | 0.380 | 0.038     | 20.082            | 0.848        |
|                | P:H    | 0.006          | 1  | 0.941        | 0.572          | 1  | 0.449        | 0.857               | 1  | 0.355 | 5.438     | 19.376            | <b>0.031</b> |
|                | P:E    | 0.042          | 1  | 0.837        | 0.415          | 1  | 0.520        | 0.772               | 1  | 0.380 | 0.047     | 19.24             | 0.831        |
|                | H:E    | 0.55           | 1  | 0.458        | 0.449          | 1  | 0.503        | 0.696               | 1  | 0.404 | 0.012     | 19.93             | 0.914        |
|                | P:H:E  | 0.032          | 1  | 0.859        | 0.009          | 1  | 0.924        | 0.672               | 1  | 0.412 | 0.44      | 19.376            | 0.515        |



**Table S8a: Multivariate perMANOVAs testing the effects of the experimental treatments from phase 1 on gene expression profiles of juvenile fish in phase 2.** We tested the effects on each functional gene group (e.g. stress response, metabolism genes, etc). Tests were performed for each juvenile ecotype separately (i.e. lake, hybrid, and stream). Treatments correspond to the effects of host (H), environment (E), parasite exposure (P), and their interactions (e.g. HxE). Stocking, in the **Factor** column, refers to the number of juveniles introduced at the start of phase 2 and is therefore tank specific. Significant P values are highlighted in bold.

| Factor                          | Lake |        |        |              | Hybrid |        |        |              | Stream |        |        |              |
|---------------------------------|------|--------|--------|--------------|--------|--------|--------|--------------|--------|--------|--------|--------------|
|                                 | Df   | F      | R2     | P            | Df     | F      | R2     | P            | Df     | F      | R2     | P            |
| <b>All genes</b>                |      |        |        |              |        |        |        |              |        |        |        |              |
| P                               | 1    | 1.466  | 0.065  | 0.323        | 1      | 6.787  | 0.181  | <b>0.006</b> | 1      | 1.26   | 0.028  | 0.374        |
| H                               | 1    | 4.021  | 0.18   | <b>0.027</b> | 1      | 0.637  | 0.017  | 0.537        | 1      | 6.201  | 0.138  | <b>0.011</b> |
| E                               | 1    | 2.503  | 0.112  | 0.176        | 1      | 0.45   | 0.012  | 0.582        | 1      | 3.38   | 0.075  | 0.11         |
| P:H                             | 1    | 0.106  | 0.005  | 0.728        | 1      | -0.326 | -0.009 | 0.92         | 1      | 3.342  | 0.075  | 0.1          |
| P:E                             | 1    | 1.311  | 0.059  | 0.372        | 1      | 0.776  | 0.021  | 0.463        | 1      | 1.155  | 0.026  | 0.425        |
| H:E                             | 1    | -0.433 | -0.019 | 0.948        | 1      | 2.348  | 0.062  | 0.146        | 1      | 2.098  | 0.047  | 0.272        |
| P:H:E                           | 1    | 0.897  | 0.04   | 0.369        | 1      | 0.112  | 0.003  | 0.785        | 1      | 2.017  | 0.045  | 0.276        |
| Residuals                       | 13   |        | 0.581  |              | 23     |        | 0.612  |              | 25     |        | 0.558  |              |
| Total                           | 21   |        | 1      |              | 31     |        | 1      |              | 33     |        | 1      |              |
| stocking                        | 1    | -0.478 | -0.021 | 0.822        | 1      | 3.808  | 0.101  | <b>0.001</b> | 1      | 0.341  | 0.008  | 0.904        |
| <b>Stress response genes</b>    |      |        |        |              |        |        |        |              |        |        |        |              |
| P                               | 1    | -2.652 | -0.063 | 0.981        | 1      | 2.115  | 0.048  | 0.211        | 1      | 5.153  | 0.127  | <b>0.024</b> |
| H                               | 1    | 10.708 | 0.254  | <b>0.020</b> | 1      | 1.871  | 0.043  | 0.216        | 1      | 1.144  | 0.028  | 0.311        |
| E                               | 1    | 7.925  | 0.188  | 0.052        | 1      | 2.73   | 0.062  | 0.212        | 1      | -0.075 | -0.002 | 0.686        |
| P:H                             | 1    | -3.689 | -0.087 | 0.995        | 1      | 0.05   | 0.001  | 0.64         | 1      | -1.009 | -0.025 | 0.887        |
| P:E                             | 1    | -0.035 | -0.001 | 0.656        | 1      | -0.861 | -0.02  | 0.817        | 1      | -0.894 | -0.022 | 0.87         |
| H:E                             | 1    | 5.559  | 0.132  | 0.105        | 1      | 3.442  | 0.079  | 0.128        | 1      | 0.599  | 0.015  | 0.392        |
| P:H:E                           | 1    | 4.714  | 0.112  | 0.086        | 1      | 1.629  | 0.037  | 0.3          | 1      | 10.234 | 0.252  | <b>0.007</b> |
| Residuals                       | 13   |        | 0.308  |              | 23     |        | 0.526  |              | 25     |        | 0.616  |              |
| Total                           | 21   |        | 1      |              | 31     |        | 1      |              | 33     |        | 1      |              |
| stocking                        | 1    | 6.682  | 0.158  | 0.067        | 1      | 9.715  | 0.222  | 0.226        | 1      | 0.424  | 0.01   | 0.118        |
| <b>Metabolism genes</b>         |      |        |        |              |        |        |        |              |        |        |        |              |
| P                               | 1    | 0.83   | 0.026  | 0.547        | 1      | 17.314 | 0.354  | <b>0.007</b> | 1      | 2.047  | 0.045  | 0.332        |
| H                               | 1    | 12.305 | 0.381  | <b>0.009</b> | 1      | -0.736 | -0.015 | 0.82         | 1      | 10.364 | 0.226  | 0.061        |
| E                               | 1    | 5.911  | 0.183  | 0.105        | 1      | 0.849  | 0.017  | 0.363        | 1      | 5.807  | 0.127  | 0.153        |
| P:H                             | 1    | -0.337 | -0.01  | 0.646        | 1      | 1.608  | 0.033  | 0.238        | 1      | 5.955  | 0.13   | 0.162        |
| P:E                             | 1    | 3.311  | 0.103  | 0.193        | 1      | 1.921  | 0.039  | 0.265        | 1      | -2.663 | -0.058 | 0.914        |
| H:E                             | 1    | -3.314 | -0.103 | 0.998        | 1      | -1.159 | -0.024 | 0.912        | 1      | -3.646 | -0.08  | 0.954        |
| P:H:E                           | 1    | 1.763  | 0.055  | 0.272        | 1      | -1.458 | -0.03  | 0.925        | 1      | 3.097  | 0.068  | 0.259        |
| Residuals                       | 13   |        | 0.403  |              | 23     |        | 0.47   |              | 25     |        | 0.545  |              |
| Total                           | 21   |        | 1      |              | 31     |        | 1      |              | 33     |        | 1      |              |
| stocking                        | 1    | -1.2   | -0.037 | 0.887        | 1      | 7.579  | 0.155  | <b>0.001</b> | 1      | -0.115 | -0.003 | 0.892        |
| <b>Innate cellular immunity</b> |      |        |        |              |        |        |        |              |        |        |        |              |

Table S8a continued

| Factor                          | Lake |        |        |       | Hybrid |        |        |              | Stream |        |        |              |
|---------------------------------|------|--------|--------|-------|--------|--------|--------|--------------|--------|--------|--------|--------------|
|                                 | Df   | F      | R2     | P     | Df     | F      | R2     | P            | Df     | F      | R2     | P            |
| P                               | 1    | 0.159  | 0.009  | 0.665 | 1      | -0.106 | -0.004 | 0.731        | 1      | 1.608  | 0.048  | 0.381        |
| H                               | 1    | 2.369  | 0.136  | 0.21  | 1      | -0.299 | -0.012 | 0.771        | 1      | 4.427  | 0.131  | 0.124        |
| E                               | 1    | -0.549 | -0.031 | 0.878 | 1      | 1.114  | 0.046  | 0.423        | 1      | 4.504  | 0.133  | 0.125        |
| P:H                             | 1    | -0.332 | -0.019 | 0.867 | 1      | -0.453 | -0.019 | 0.823        | 1      | -2.483 | -0.073 | 0.958        |
| P:E                             | 1    | 1.759  | 0.101  | 0.207 | 1      | -0.477 | -0.02  | 0.795        | 1      | -0.156 | -0.005 | 0.62         |
| H:E                             | 1    | 0.25   | 0.014  | 0.637 | 1      | -0.183 | -0.008 | 0.680        | 1      | -1.696 | -0.05  | 0.892        |
| P:H:E                           | 1    | 1.036  | 0.059  | 0.26  | 1      | 0.33   | 0.014  | 0.550        | 1      | 2.765  | 0.082  | 0.24         |
| Residuals                       | 13   |        | 0.745  |       | 23     |        | 0.953  |              | 25     |        | 0.739  |              |
| Total                           | 21   |        | 1      |       | 31     |        | 1      |              | 33     |        | 1      |              |
| stocking                        | 1    | -0.251 | -0.014 | 0.697 | 1      | 1.206  | 0.05   | 0.376        | 1      | -0.135 | -0.004 | 0.9          |
| <b>Innate humoral immunity</b>  |      |        |        |       |        |        |        |              |        |        |        |              |
| P                               | 1    | 0.787  | 0.053  | 0.507 | 1      | -0.128 | -0.004 | 0.526        | 1      | 6.882  | 0.191  | 0.115        |
| H                               | 1    | 0.929  | 0.063  | 0.44  | 1      | 2.689  | 0.086  | 0.240        | 1      | 8.718  | 0.241  | 0.06         |
| E                               | 1    | -0.915 | -0.062 | 0.843 | 1      | -2.326 | -0.074 | 0.914        | 1      | 6.213  | 0.172  | 0.106        |
| P:H                             | 1    | -0.185 | -0.013 | 0.712 | 1      | 0.241  | 0.008  | 0.455        | 1      | -3.672 | -0.102 | 0.962        |
| P:E                             | 1    | -0.387 | -0.026 | 0.709 | 1      | 0.468  | 0.015  | 0.412        | 1      | -5.496 | -0.152 | 0.988        |
| H:E                             | 1    | 0.516  | 0.035  | 0.395 | 1      | 2.995  | 0.096  | 0.156        | 1      | -2.11  | -0.058 | 0.862        |
| P:H:E                           | 1    | 1.459  | 0.099  | 0.424 | 1      | -0.951 | -0.03  | 0.754        | 1      | 0.409  | 0.011  | 0.441        |
| Residuals                       | 13   |        | 0.878  |       | 23     |        | 0.736  |              | 25     |        | 0.692  |              |
| Total                           | 21   |        | 1      |       | 31     |        | 1      |              | 33     |        | 1      |              |
| stocking                        | 1    | -0.401 | -0.027 | 0.925 | 1      | 5.243  | 0.168  | <b>0.023</b> | 1      | 0.178  | 0.005  | 0.265        |
| <b>Innate immune signalling</b> |      |        |        |       |        |        |        |              |        |        |        |              |
| P                               | 1    | -0.445 | -0.017 | 0.658 | 1      | -0.074 | -0.003 | 0.743        | 1      | 0.147  | 0.003  | 0.626        |
| H                               | 1    | 2.467  | 0.094  | 0.168 | 1      | 0.511  | 0.018  | 0.564        | 1      | 2.454  | 0.043  | 0.253        |
| E                               | 1    | -1.278 | -0.049 | 0.927 | 1      | -2.605 | -0.093 | 0.993        | 1      | -1.296 | -0.023 | 0.88         |
| P:H                             | 1    | 2.061  | 0.079  | 0.238 | 1      | 0.056  | 0.002  | 0.678        | 1      | -0.815 | -0.014 | 0.775        |
| P:E                             | 1    | 2.108  | 0.08   | 0.114 | 1      | -0.735 | -0.026 | 0.864        | 1      | 9.496  | 0.166  | <b>0.020</b> |
| H:E                             | 1    | 6.792  | 0.259  | 0.067 | 1      | 8.489  | 0.303  | <b>0.020</b> | 1      | 13.45  | 0.235  | 0.009        |
| P:H:E                           | 1    | 1.306  | 0.05   | 0.177 | 1      | -0.298 | -0.011 | 0.788        | 1      | 4.852  | 0.085  | 0.105        |
| Residuals                       | 13   |        | 0.496  |       | 23     |        | 0.82   |              | 25     |        | 0.436  |              |
| Total                           | 21   |        | 1      |       | 31     |        | 1      |              | 33     |        | 1      |              |
| stocking                        | 1    | 0.198  | 0.008  | 0.827 | 1      | -0.301 | -0.011 | 0.853        | 1      | 3.989  | 0.07   | 0.159        |
| <b>Complement system</b>        |      |        |        |       |        |        |        |              |        |        |        |              |
| P                               | 1    | 1.033  | 0.066  | 0.426 | 1      | 0.459  | 0.019  | 0.399        | 1      | 2.523  | 0.065  | 0.213        |
| H                               | 1    | -0.189 | -0.012 | 0.66  | 1      | 0.53   | 0.022  | 0.416        | 1      | 6.877  | 0.177  | <b>0.050</b> |
| E                               | 1    | 0.145  | 0.009  | 0.531 | 1      | -4.507 | -0.187 | 0.987        | 1      | 6.683  | 0.172  | <b>0.047</b> |
| P:H                             | 1    | -0.321 | -0.02  | 0.746 | 1      | 0.288  | 0.012  | 0.431        | 1      | -3.586 | -0.092 | 0.983        |
| P:E                             | 1    | -0.276 | -0.018 | 0.774 | 1      | -0.148 | -0.006 | 0.557        | 1      | -1.689 | -0.043 | 0.892        |
| H:E                             | 1    | 0.005  | 0      | 0.462 | 1      | -0.4   | -0.017 | 0.630        | 1      | 1.714  | 0.044  | 0.258        |
| P:H:E                           | 1    | 2.297  | 0.146  | 0.315 | 1      | 0.495  | 0.021  | 0.460        | 1      | 1.362  | 0.035  | 0.262        |
| Residuals                       | 13   |        | 0.828  |       | 23     |        | 0.956  |              | 25     |        | 0.643  |              |

Table S8a continued

| Factor                   | Lake |        |        |       | Hybrid |        |        |              | Stream |        |        |       |
|--------------------------|------|--------|--------|-------|--------|--------|--------|--------------|--------|--------|--------|-------|
|                          | Df   | F      | R2     | P     | Df     | F      | R2     | P            | Df     | F      | R2     | P     |
| Total                    | 21   |        | 1      |       | 31     |        | 1      |              | 33     |        | 1      |       |
| stocking                 | 1    | 0.003  | 0      | 0.756 | 1      | 4.354  | 0.181  | <b>0.037</b> | 1      | -0.003 | 0      | 0.478 |
| <b>Adaptive immunity</b> |      |        |        |       |        |        |        |              |        |        |        |       |
| P                        | 1    | 0.374  | 0.024  | 0.506 | 1      | 7.433  | 0.158  | <b>0.015</b> | 1      | -2.342 | -0.063 | 0.948 |
| H                        | 1    | 1.712  | 0.111  | 0.352 | 1      | 5.98   | 0.127  | <b>0.014</b> | 1      | 4.329  | 0.117  | 0.129 |
| E                        | 1    | -1.419 | -0.092 | 0.824 | 1      | -0.508 | -0.011 | 0.805        | 1      | 1.49   | 0.04   | 0.371 |
| P:H                      | 1    | 0.544  | 0.035  | 0.634 | 1      | -2.748 | -0.059 | 0.999        | 1      | 1.784  | 0.048  | 0.317 |
| P:E                      | 1    | -0.407 | -0.027 | 0.659 | 1      | 11.902 | 0.253  | <b>0.002</b> | 1      | 2.18   | 0.059  | 0.259 |
| H:E                      | 1    | 1.214  | 0.079  | 0.416 | 1      | 0.162  | 0.003  | 0.601        | 1      | 0.495  | 0.013  | 0.458 |
| P:H:E                    | 1    | 0.628  | 0.041  | 0.45  | 1      | 0.221  | 0.005  | 0.537        | 1      | 3.077  | 0.083  | 0.167 |
| Residuals                | 13   |        | 0.847  |       | 23     |        | 0.49   |              | 25     |        | 0.677  |       |
| Total                    | 21   |        | 1      |       | 31     |        | 1      |              | 33     |        | 1      |       |
| stocking                 | 1    | -0.289 | -0.019 | 0.522 | 1      | 1.516  | 0.032  | 0.147        | 1      | 0.893  | 0.024  | 0.468 |

**Table S8b: Univariate LMMs testing the effects of experimental treatments from phase 1 on each gene of juvenile fish in phase 2.** Tests were performed for each juvenile ecotype separately (i.e. lake, hybrid, and stream). Treatments correspond to the effects of host (H), environment (E), parasite exposure (P), and their interactions (e.g. HxE). P-values lower than 0.05 are highlighted in bold and significant P-values after FDR correction according to Benjamini-Yekutieli are marked with \*.

| Treatment      | Lake  |    |         |       | Hybrid |         |              | Stream |         |              |
|----------------|-------|----|---------|-------|--------|---------|--------------|--------|---------|--------------|
|                | F     | Df | Df.res  | P     | F      | Df.res  | P            | F      | Df.res  | P            |
| <b>fabp2</b>   |       |    |         |       |        |         |              |        |         |              |
| P              | 0.379 | 1  | 88.829  | 0.540 | 0.030  | 144.156 | 0.863        | 1.072  | 205.739 | 0.302        |
| H              | 1.562 | 1  | 130.261 | 0.214 | 0.021  | 149.616 | 0.885        | 0.013  | 202.295 | 0.908        |
| E              | 1.085 | 1  | 96.322  | 0.300 | 0.512  | 196.342 | 0.475        | 0.845  | 202.254 | 0.359        |
| H:E            | 0.001 | 1  | 144.039 | 0.978 | 0.673  | 201.116 | 0.413        | 0.152  | 215.250 | 0.697        |
| P:H            | 0.006 | 1  | 149.611 | 0.940 | 0.055  | 152.153 | 0.815        | 0.093  | 219.162 | 0.761        |
| P:E            | 0.869 | 1  | 89.241  | 0.354 | 3.186  | 220.696 | 0.076        | 0.574  | 233.549 | 0.450        |
| P:H:E          | 0.095 | 1  | 139.143 | 0.759 | 0.092  | 221.812 | 0.762        | 0.654  | 211.046 | 0.420        |
| lambda         | 3.073 |    |         |       | 4.731  |         |              | 3.979  |         |              |
| <b>gapdh</b>   |       |    |         |       |        |         |              |        |         |              |
| P              | 0.863 | 1  | 41.546  | 0.358 | 0.037  | 124.467 | 0.847        | 4.614  | 206.118 | <b>0.033</b> |
| H              | 0.152 | 1  | 52.095  | 0.699 | 0.471  | 126.057 | 0.494        | 1.472  | 202.493 | 0.226        |
| E              | 0.079 | 1  | 45.519  | 0.779 | 0.304  | 166.413 | 0.582        | 0.871  | 202.809 | 0.352        |
| H:E            | 0.140 | 1  | 58.561  | 0.709 | 1.506  | 164.669 | 0.221        | 1.274  | 214.998 | 0.260        |
| P:H            | 0.300 | 1  | 61.867  | 0.586 | 0.226  | 127.300 | 0.635        | 3.749  | 218.848 | 0.054        |
| P:E            | 0.176 | 1  | 41.570  | 0.677 | 0.054  | 182.535 | 0.816        | 1.164  | 232.548 | 0.282        |
| P:H:E          | 0.005 | 1  | 55.316  | 0.946 | 0.536  | 182.521 | 0.465        | 0.442  | 211.017 | 0.507        |
| lambda         |       |    |         |       |        |         |              | 0.586  |         |              |
| <b>acadsb</b>  |       |    |         |       |        |         |              |        |         |              |
| P              | 2.211 | 1  | 67.140  | 0.142 | 0.033  | 71.577  | 0.856        | 0.932  | 206.133 | 0.335        |
| E              | 0.733 | 1  | 68.379  | 0.395 | 0.001  | 88.961  | 0.971        | 0.200  | 202.833 | 0.655        |
| H              | 0.161 | 1  | 90.329  | 0.689 | 0.043  | 71.650  | 0.836        | 2.526  | 202.501 | 0.114        |
| H:E            | 1.210 | 1  | 98.833  | 0.274 | 0.438  | 91.865  | 0.510        | 0.005  | 214.989 | 0.942        |
| P:H            | 0.247 | 1  | 100.777 | 0.621 | 0.799  | 74.375  | 0.374        | 0.335  | 218.837 | 0.564        |
| P:E            | 0.000 | 1  | 61.803  | 0.995 | 0.272  | 98.894  | 0.603        | 0.237  | 232.511 | 0.627        |
| P:H:E          | 0.886 | 1  | 108.899 | 0.349 | 0.570  | 97.534  | 0.452        | 0.370  | 211.017 | 0.544        |
| lambda         |       |    |         |       |        |         |              |        |         |              |
| <b>rab11a1</b> |       |    |         |       |        |         |              |        |         |              |
| P              | 1.239 | 1  | 66.383  | 0.270 | 0.002  | 132.302 | 0.962        | 0.801  | 112.212 | 0.373        |
| H              | 0.108 | 1  | 91.679  | 0.743 | 0.030  | 136.965 | 0.863        | 1.286  | 106.237 | 0.259        |
| E              | 0.749 | 1  | 71.969  | 0.390 | 0.734  | 179.219 | 0.393        | 0.008  | 115.188 | 0.93         |
| H:E            | 0.851 | 1  | 104.103 | 0.358 | 0.029  | 184.910 | 0.864        | 0.182  | 114.787 | 0.67         |
| P:H            | 0.060 | 1  | 108.648 | 0.807 | 1.901  | 140.115 | 0.170        | 0.039  | 113.593 | 0.844        |
| P:E            | 1.264 | 1  | 65.945  | 0.265 | 3.898  | 202.313 | <b>0.050</b> | 0.426  | 121.136 | 0.515        |
| P:H:E          | 0.187 | 1  | 99.985  | 0.666 | 0.034  | 201.536 | 0.853        | 0.077  | 112.670 | 0.782        |
| lambda         |       |    |         |       |        |         |              | 3.384  |         |              |

**Table S8b:** continued

| Treatment    | Lake   |    |         |                   | Hybrid |         |               | Stream |         |               |
|--------------|--------|----|---------|-------------------|--------|---------|---------------|--------|---------|---------------|
|              | F      | Df | Df.res  | P                 | F      | Df.res  | P             | F      | Df.res  | P             |
| <b>ctrc</b>  |        |    |         |                   |        |         |               |        |         |               |
| P            | 0.374  | 1  | 97.119  | 0.542             | 2.499  | 144.426 | 0.116         | 0.530  | 65.667  | 0.469         |
| H            | 2.982  | 1  | 144.416 | 0.086             | 0.058  | 150.160 | 0.81          | 2.585  | 61.969  | 0.113         |
| E            | 1.352  | 1  | 105.400 | 0.247             | 2.319  | 197.250 | 0.129         | 1.100  | 68.779  | 0.298         |
| H:E          | 0.005  | 1  | 157.422 | 0.944             | 0.471  | 202.754 | 0.493         | 0.004  | 67.159  | 0.953         |
| P:H          | 0.004  | 1  | 163.387 | 0.950             | 5.639  | 152.944 | <b>0.019*</b> | 2.132  | 65.221  | 0.149         |
| P:E          | 1.353  | 1  | 98.068  | 0.248             | 0.025  | 222.034 | 0.875         | 2.333  | 70.294  | 0.131         |
| P:H:E        | 0.858  | 1  | 152.203 | 0.356             | 0.226  | 222.634 | 0.635         | 1.301  | 65.988  | 0.258         |
| lambda       | -0.149 |    |         |                   |        |         |               |        |         |               |
| <b>hsp70</b> |        |    |         |                   |        |         |               |        |         |               |
| P            | 0.021  | 1  | 48.219  | 0.885             | 1.492  | 136.522 | 0.224         | 1.343  | 205.658 | 0.248         |
| H            | 2.781  | 1  | 61.334  | 0.101             | 1.631  | 136.133 | 0.204         | 0.693  | 202.252 | 0.406         |
| E            | 1.986  | 1  | 51.817  | 0.165             | 0.468  | 187.224 | 0.495         | 0.000  | 202.137 | 0.999         |
| H:E          | 0.014  | 1  | 69.751  | 0.905             | 0.980  | 174.978 | 0.323         | 0.862  | 215.314 | 0.354         |
| P:H          | 0.191  | 1  | 72.080  | 0.663             | 1.167  | 135.632 | 0.282         | 0.004  | 219.242 | 0.948         |
| P:E          | 0.785  | 1  | 46.873  | 0.380             | 2.649  | 198.130 | 0.105         | 0.281  | 233.786 | 0.597         |
| P:H:E        | 0.301  | 1  | 68.177  | 0.585             | 1.262  | 190.327 | 0.263         | 5.331  | 211.059 | <b>0.022*</b> |
| lambda       |        |    |         |                   | 1.457  |         |               |        |         |               |
| <b>hsp90</b> |        |    |         |                   |        |         |               |        |         |               |
| P            | 0.012  | 1  | 96.526  | 0.912             | 2.098  | 142.652 | 0.150         | 0.074  | 206.313 | 0.785         |
| H            | 0.756  | 1  | 140.989 | 0.386             | 2.853  | 146.645 | 0.093         | 0.000  | 202.594 | 0.988         |
| E            | 0.116  | 1  | 104.142 | 0.734             | 0.118  | 192.449 | 0.731         | 0.003  | 203.101 | 0.957         |
| H:E          | 0.991  | 1  | 155.702 | 0.321             | 0.171  | 193.503 | 0.679         | 0.243  | 214.895 | 0.623         |
| P:H          | 0.348  | 1  | 160.792 | 0.556             | 1.325  | 148.128 | 0.252         | 0.176  | 218.720 | 0.675         |
| P:E          | 11.320 | 1  | 96.943  | <b>&lt;0.001*</b> | 1.333  | 214.009 | 0.250         | 0.028  | 232.098 | 0.868         |
| P:H:E        | 0.409  | 1  | 151.429 | 0.524             | 0.018  | 216.577 | 0.892         | 0.601  | 211.022 | 0.439         |
| lambda       |        |    |         |                   |        |         |               | 5.096  |         |               |
| <b>nr3c1</b> |        |    |         |                   |        |         |               |        |         |               |
| P            | 0.956  | 1  | 76.133  | 0.331             | 0.008  | 111.918 | 0.930         | 2.809  | 150.075 | 0.096         |
| H            | 0.760  | 1  | 104.823 | 0.385             | 0.665  | 114.575 | 0.416         | 1.433  | 144.571 | 0.233         |
| E            | 0.005  | 1  | 81.063  | 0.944             | 0.248  | 148.256 | 0.619         | 0.385  | 151.217 | 0.536         |
| H:E          | 1.633  | 1  | 120.155 | 0.204             | 1.524  | 152.988 | 0.219         | 0.275  | 154.927 | 0.600         |
| P:H          | 0.188  | 1  | 122.885 | 0.666             | 0.888  | 117.796 | 0.348         | 0.178  | 155.546 | 0.674         |
| P:E          | 1.515  | 1  | 74.294  | 0.222             | 0.484  | 167.284 | 0.488         | 0.163  | 164.619 | 0.687         |
| P:H:E        | 1.160  | 1  | 118.889 | 0.284             | 0.050  | 165.687 | 0.823         | 0.062  | 151.928 | 0.803         |
| lambda       |        |    |         |                   |        |         |               |        |         |               |
| <b>sod2</b>  |        |    |         |                   |        |         |               |        |         |               |
| P            | 0.425  | 1  | 97.119  | 0.516             | 0.412  | 79.348  | 0.523         | 1.142  | 218.126 | 0.286         |
| H            | 1.425  | 1  | 144.416 | 0.234             | 0.446  | 79.726  | 0.506         | 0.805  | 206.939 | 0.371         |
| E            | 0.424  | 1  | 105.400 | 0.516             | 0.658  | 100.089 | 0.419         | 0.482  | 218.889 | 0.488         |

**Table S8b:** continued

| Treatment    | Lake  |    |         |       | Hybrid |         |       | Stream |         |               |
|--------------|-------|----|---------|-------|--------|---------|-------|--------|---------|---------------|
|              | F     | Df | Df.res  | P     | F      | Df.res  | P     | F      | Df.res  | P             |
| H:E          | 0.260 | 1  | 157.422 | 0.611 | 0.689  | 103.310 | 0.409 | 0.563  | 220.853 | 0.454         |
| P:H          | 0.019 | 1  | 163.387 | 0.89  | 4.590  | 82.629  | 0.035 | 1.075  | 225.158 | 0.301         |
| P:E          | 0.149 | 1  | 98.068  | 0.701 | 0.270  | 111.771 | 0.604 | 0.102  | 237.367 | 0.749         |
| P:H:E        | 0.517 | 1  | 152.203 | 0.473 | 0.005  | 110.184 | 0.943 | 0.060  | 217.921 | 0.806         |
| lambda       |       |    |         |       |        |         |       |        |         |               |
| <b>vegfa</b> |       |    |         |       |        |         |       |        |         |               |
| P            | 1.903 | 1  | 43.975  | 0.175 | 0.063  | 106.168 | 0.803 | 3.200  | 173.733 | 0.075         |
| H            | 0.213 | 1  | 54.675  | 0.646 | 0.398  | 108.324 | 0.529 | 0.016  | 170.321 | 0.900         |
| E            | 1.375 | 1  | 45.246  | 0.247 | 0.607  | 139.610 | 0.437 | 0.000  | 171.943 | 0.984         |
| H:E          | 1.598 | 1  | 60.264  | 0.211 | 0.325  | 144.063 | 0.569 | 0.116  | 183.652 | 0.734         |
| P:H          | 0.442 | 1  | 61.480  | 0.508 | 0.170  | 111.532 | 0.681 | 0.092  | 186.045 | 0.762         |
| P:E          | 3.622 | 1  | 40.608  | 0.064 | 0.887  | 157.382 | 0.348 | 0.020  | 199.584 | 0.889         |
| P:H:E        | 0.128 | 1  | 65.477  | 0.721 | 0.576  | 155.673 | 0.449 | 0.001  | 178.994 | 0.977         |
| lambda       |       |    |         |       |        |         |       | 3.099  |         |               |
| <b>tf</b>    |       |    |         |       |        |         |       |        |         |               |
| P            | 0.092 | 1  | 36.543  | 0.763 | 2.089  | 84.373  | 0.152 | 0.000  | 111.859 | 0.989         |
| H            | 0.368 | 1  | 44.941  | 0.547 | 0.130  | 84.294  | 0.719 | 2.944  | 105.606 | 0.089         |
| E            | 0.122 | 1  | 40.239  | 0.728 | 0.609  | 107.878 | 0.437 | 0.039  | 114.954 | 0.844         |
| H:E          | 0.516 | 1  | 50.024  | 0.476 | 0.194  | 108.791 | 0.661 | 0.580  | 114.141 | 0.448         |
| P:H          | 0.292 | 1  | 52.996  | 0.591 | 2.675  | 86.309  | 0.106 | 0.035  | 112.892 | 0.852         |
| P:E          | 0.192 | 1  | 36.808  | 0.664 | 0.079  | 118.853 | 0.779 | 1.313  | 120.459 | 0.254         |
| P:H:E        | 0.704 | 1  | 46.980  | 0.406 | 0.043  | 116.789 | 0.836 | 0.009  | 112.084 | 0.923         |
| lambda       | 0.286 |    |         |       |        |         |       |        |         |               |
| <b>sla1</b>  |       |    |         |       |        |         |       |        |         |               |
| P            | 0.742 | 1  | 90.452  | 0.391 | 0.263  | 71.863  | 0.61  | 3.107  | 215.820 | 0.079         |
| H            | 1.428 | 1  | 124.595 | 0.234 | 1.014  | 71.945  | 0.317 | 0.024  | 206.285 | 0.878         |
| E            | 0.023 | 1  | 93.112  | 0.879 | 0.863  | 89.367  | 0.355 | 1.196  | 216.237 | 0.275         |
| H:E          | 1.047 | 1  | 136.440 | 0.308 | 0.128  | 92.283  | 0.722 | 3.389  | 219.024 | 0.067         |
| P:H          | 0.548 | 1  | 138.229 | 0.461 | 0.026  | 74.678  | 0.872 | 1.310  | 223.121 | 0.254         |
| P:E          | 0.261 | 1  | 86.100  | 0.611 | 0.775  | 99.365  | 0.381 | 7.234  | 234.269 | <b>0.008*</b> |
| P:H:E        | 0.081 | 1  | 144.197 | 0.777 | 0.100  | 97.994  | 0.753 | 0.804  | 216.337 | 0.371         |
| lambda       |       |    |         |       |        |         |       | -0.792 |         |               |
| <b>ogfr</b>  |       |    |         |       |        |         |       |        |         |               |
| P            | 0.306 | 1  | 67.806  | 0.582 | 0.003  | 144.674 | 0.959 | 3.941  | 150.834 | <b>0.049</b>  |
| H            | 0.005 | 1  | 91.209  | 0.941 | 0.602  | 150.665 | 0.439 | 1.215  | 146.841 | 0.272         |
| E            | 0.161 | 1  | 71.910  | 0.689 | 0.021  | 198.158 | 0.885 | 0.203  | 150.751 | 0.653         |
| H:E          | 0.758 | 1  | 104.836 | 0.386 | 1.099  | 204.355 | 0.296 | 0.387  | 158.347 | 0.535         |
| P:H          | 0.036 | 1  | 106.893 | 0.849 | 0.208  | 153.696 | 0.649 | 0.436  | 159.328 | 0.510         |
| P:E          | 2.183 | 1  | 65.397  | 0.144 | 1.396  | 223.308 | 0.239 | 0.054  | 169.997 | 0.816         |
| P:H:E        | 0.167 | 1  | 104.612 | 0.683 | 0.040  | 223.352 | 0.842 | 0.060  | 154.477 | 0.806         |

**Table S8b:** continued

| Treatment    | Lake  |    |         |              | Hybrid |         |              | Stream |         |       |
|--------------|-------|----|---------|--------------|--------|---------|--------------|--------|---------|-------|
|              | F     | Df | Df.res  | P            | F      | Df.res  | P            | F      | Df.res  | P     |
| lambda       |       |    |         |              |        |         |              | 3.549  |         |       |
| <b>tlr2</b>  |       |    |         |              |        |         |              |        |         |       |
| P            | 0.002 | 1  | 96.654  | 0.964        | 0.271  | 142.307 | 0.603        | 3.972  | 175.819 | 0.048 |
| H            | 0.542 | 1  | 141.690 | 0.463        | 0.166  | 145.986 | 0.684        | 0.008  | 166.932 | 0.927 |
| E            | 0.492 | 1  | 104.410 | 0.485        | 2.553  | 191.786 | 0.112        | 1.109  | 177.601 | 0.294 |
| H:E          | 1.039 | 1  | 156.078 | 0.310        | 2.088  | 192.057 | 0.15         | 0.190  | 178.655 | 0.663 |
| P:H          | 0.006 | 1  | 161.351 | 0.940        | 2.608  | 147.289 | 0.108        | 0.139  | 180.396 | 0.710 |
| P:E          | 4.214 | 1  | 97.186  | <b>0.043</b> | 0.352  | 212.663 | 0.553        | 1.320  | 190.542 | 0.252 |
| P:H:E        | 0.323 | 1  | 151.597 | 0.571        | 1.532  | 215.264 | 0.217        | 0.036  | 175.935 | 0.849 |
| lambda       |       |    |         |              |        |         |              |        |         |       |
| <b>f2</b>    |       |    |         |              |        |         |              |        |         |       |
| P            | 0.659 | 1  | 40.707  | 0.422        | 0.429  | 114.090 | 0.514        | 2.382  | 198.135 | 0.124 |
| H            | 0.073 | 1  | 50.873  | 0.788        | 0.091  | 116.945 | 0.763        | 3.366  | 189.333 | 0.068 |
| E            | 0.002 | 1  | 44.633  | 0.968        | 0.088  | 151.534 | 0.767        | 0.467  | 199.011 | 0.495 |
| H:E          | 0.162 | 1  | 57.105  | 0.689        | 1.078  | 156.371 | 0.301        | 0.004  | 201.429 | 0.948 |
| P:H          | 0.117 | 1  | 60.359  | 0.733        | 1.329  | 120.167 | 0.251        | 1.029  | 204.473 | 0.312 |
| P:E          | 0.335 | 1  | 40.769  | 0.566        | 0.008  | 171.026 | 0.927        | 0.274  | 214.992 | 0.601 |
| P:H:E        | 0.106 | 1  | 53.894  | 0.746        | 0.112  | 169.485 | 0.738        | 0.120  | 198.709 | 0.729 |
| lambda       |       |    |         |              |        |         |              | 0.545  |         |       |
| <b>saal1</b> |       |    |         |              |        |         |              |        |         |       |
| P            | 0.258 | 1  | 49.124  | 0.614        | 1.692  | 137.150 | 0.195        | 0.205  | 130.049 | 0.651 |
| H            | 0.553 | 1  | 62.303  | 0.460        | 0.053  | 142.328 | 0.818        | 0.108  | 125.021 | 0.743 |
| E            | 1.554 | 1  | 51.487  | 0.218        | 0.476  | 186.634 | 0.491        | 1.175  | 131.800 | 0.280 |
| H:E          | 0.009 | 1  | 70.047  | 0.925        | 1.484  | 192.533 | 0.225        | 0.408  | 134.709 | 0.524 |
| P:H          | 1.478 | 1  | 71.064  | 0.228        | 2.718  | 145.438 | 0.101        | 0.011  | 134.437 | 0.917 |
| P:E          | 0.013 | 1  | 46.161  | 0.909        | 3.687  | 210.577 | 0.056        | 0.168  | 142.871 | 0.683 |
| P:H:E        | 0.491 | 1  | 72.425  | 0.486        | 0.757  | 210.093 | 0.385        | 0.776  | 131.880 | 0.380 |
| lambda       |       |    |         |              |        |         |              | -0.389 |         |       |
| <b>socs1</b> |       |    |         |              |        |         |              |        |         |       |
| P            | 0.075 | 1  | 83.125  | 0.785        | 0.256  | 107.463 | 0.614        | 1.824  | 208.591 | 0.178 |
| H            | 0.009 | 1  | 115.213 | 0.924        | 4.206  | 109.729 | <b>0.043</b> | 0.378  | 203.695 | 0.539 |
| E            | 2.694 | 1  | 83.389  | 0.104        | 2.373  | 141.554 | 0.126        | 0.414  | 206.561 | 0.521 |
| H:E          | 1.316 | 1  | 121.051 | 0.254        | 2.397  | 146.069 | 0.124        | 0.001  | 214.712 | 0.970 |
| P:H          | 0.006 | 1  | 127.476 | 0.937        | 0.019  | 112.942 | 0.89         | 3.164  | 218.434 | 0.077 |
| P:E          | 0.016 | 1  | 76.768  | 0.901        | 1.817  | 159.612 | 0.180        | 2.155  | 229.390 | 0.143 |
| P:H:E        | 2.512 | 1  | 136.560 | 0.115        | 1.683  | 157.923 | 0.196        | 0.980  | 211.722 | 0.323 |
| lambda       |       |    |         |              |        |         |              |        |         |       |
| <b>cd97</b>  |       |    |         |              |        |         |              |        |         |       |
| P            | 2.028 | 1  | 87.229  | 0.158        | 0.022  | 103.945 | 0.883        | 0.835  | 205.536 | 0.362 |

**Table S8b:** continued

| Treatment    | Lake  |    |         |              | Hybrid |         |              | Stream |         |              |
|--------------|-------|----|---------|--------------|--------|---------|--------------|--------|---------|--------------|
|              | F     | Df | Df.res  | P            | F      | Df.res  | P            | F      | Df.res  | P            |
| H            | 0.525 | 1  | 120.998 | 0.470        | 1.428  | 104.534 | 0.235        | 0.125  | 202.050 | 0.724        |
| E            | 2.201 | 1  | 88.149  | 0.141        | 0.173  | 136.564 | 0.678        | 0.098  | 202.105 | 0.755        |
| H:E          | 2.085 | 1  | 127.563 | 0.151        | 0.363  | 136.252 | 0.548        | 0.799  | 214.902 | 0.372        |
| P:H          | 0.196 | 1  | 132.568 | 0.659        | 0.554  | 106.287 | 0.459        | 0.039  | 218.785 | 0.844        |
| P:E          | 0.601 | 1  | 81.363  | 0.441        | 0.177  | 150.182 | 0.674        | 2.323  | 233.002 | 0.129        |
| P:H:E        | 0.025 | 1  | 141.556 | 0.874        | 0.071  | 148.628 | 0.79         | 0.039  | 210.744 | 0.844        |
| lambda       |       |    |         |              |        |         |              |        |         |              |
| <b>mif</b>   |       |    |         |              |        |         |              |        |         |              |
| P            | 4.121 | 1  | 92.226  | <b>0.045</b> | 2.237  | 140.486 | 0.137        | 1.674  | 218.126 | 0.197        |
| H            | 1.681 | 1  | 127.141 | 0.197        | 0.012  | 146.022 | 0.913        | 0.296  | 206.939 | 0.587        |
| E            | 0.005 | 1  | 96.053  | 0.941        | 1.885  | 191.740 | 0.171        | 3.605  | 218.889 | 0.059        |
| H:E          | 0.169 | 1  | 142.094 | 0.682        | 0.780  | 197.776 | 0.378        | 2.354  | 220.853 | 0.126        |
| P:H          | 0.450 | 1  | 143.615 | 0.504        | 1.852  | 149.099 | 0.176        | 0.279  | 225.158 | 0.598        |
| P:E          | 2.100 | 1  | 89.013  | 0.151        | 0.566  | 216.235 | 0.453        | 0.062  | 237.367 | 0.804        |
| P:H:E        | 0.909 | 1  | 146.031 | 0.342        | 0.233  | 215.974 | 0.630        | 0.530  | 217.921 | 0.467        |
| lambda       | 5.788 |    |         |              |        |         |              | -1.934 |         |              |
| <b>il1b</b>  |       |    |         |              |        |         |              |        |         |              |
| P            | 0.076 | 1  | 64.391  | 0.784        | 0.510  | 84.175  | 0.477        | 1.030  | 193.528 | 0.311        |
| H            | 0.000 | 1  | 85.681  | 0.984        | 1.918  | 84.289  | 0.170        | 0.191  | 186.375 | 0.663        |
| E            | 0.988 | 1  | 66.360  | 0.324        | 3.051  | 107.404 | 0.084        | 1.556  | 193.833 | 0.214        |
| H:E          | 1.809 | 1  | 95.588  | 0.182        | 5.161  | 109.048 | <b>0.025</b> | 4.859  | 197.647 | <b>0.029</b> |
| P:H          | 0.758 | 1  | 96.575  | 0.386        | 0.626  | 86.579  | 0.431        | 0.279  | 200.455 | 0.598        |
| P:E          | 0.977 | 1  | 59.814  | 0.327        | 1.653  | 118.883 | 0.201        | 0.724  | 210.395 | 0.396        |
| P:H:E        | 0.016 | 1  | 102.188 | 0.899        | 0.880  | 117.029 | 0.350        | 1.916  | 194.912 | 0.168        |
| lambda       |       |    |         |              |        |         |              |        |         |              |
| <b>tgfb1</b> |       |    |         |              |        |         |              |        |         |              |
| P            | 2.433 | 1  | 34.113  | 0.128        | 0.008  | 102.058 | 0.928        | 4.224  | 157.727 | <b>0.042</b> |
| H            | 0.358 | 1  | 40.750  | 0.553        | 0.280  | 103.879 | 0.598        | 0.479  | 153.302 | 0.490        |
| E            | 0.170 | 1  | 36.178  | 0.683        | 0.349  | 133.463 | 0.556        | 0.011  | 157.634 | 0.916        |
| H:E          | 1.803 | 1  | 44.820  | 0.186        | 1.005  | 137.718 | 0.318        | 1.072  | 164.515 | 0.302        |
| P:H          | 0.235 | 1  | 46.002  | 0.630        | 0.106  | 107.068 | 0.746        | 0.103  | 165.718 | 0.748        |
| P:E          | 3.062 | 1  | 32.656  | 0.090        | 0.872  | 150.319 | 0.352        | 0.148  | 176.042 | 0.701        |
| P:H:E        | 0.200 | 1  | 45.438  | 0.657        | 0.160  | 148.560 | 0.690        | 0.000  | 160.882 | 0.994        |
| lambda       |       |    |         |              |        |         |              | 2.633  |         |              |
| <b>tnfa</b>  |       |    |         |              |        |         |              |        |         |              |
| P            | 1.223 | 1  | 59.360  | 0.273        | 0.016  | 67.851  | 0.900        | 2.998  | 206.437 | 0.085        |
| H            | 0.459 | 1  | 77.816  | 0.500        | 1.231  | 67.816  | 0.271        | 0.086  | 202.659 | 0.769        |
| E            | 0.161 | 1  | 61.717  | 0.689        | 0.001  | 83.688  | 0.974        | 0.144  | 203.288 | 0.705        |
| H:E          | 0.967 | 1  | 87.705  | 0.328        | 0.051  | 86.449  | 0.823        | 0.654  | 214.839 | 0.420        |
| P:H          | 0.011 | 1  | 88.573  | 0.918        | 0.044  | 70.440  | 0.834        | 0.287  | 218.649 | 0.592        |



**Table S8b:** continued

| Treatment   | Lake  |    |         |       | Hybrid |         |               | Stream |         |       |
|-------------|-------|----|---------|-------|--------|---------|---------------|--------|---------|-------|
|             | F     | Df | Df.res  | P     | F      | Df.res  | P             | F      | Df.res  | P     |
| P:E         | 0.776 | 1  | 55.482  | 0.382 | 0.043  | 92.797  | 0.836         | 2.780  | 231.832 | 0.097 |
| P:H:E       | 0.053 | 1  | 91.917  | 0.818 | 0.015  | 91.576  | 0.904         | 0.005  | 211.031 | 0.946 |
| lambda      |       |    |         |       |        |         |               |        |         |       |
| <b>c7</b>   |       |    |         |       |        |         |               |        |         |       |
| P           | 0.271 | 1  | 97.119  | 0.604 | 0.002  | 81.072  | 0.963         | 1.250  | 202.109 | 0.265 |
| H           | 1.696 | 1  | 144.416 | 0.195 | 0.289  | 81.532  | 0.593         | 0.838  | 191.610 | 0.361 |
| E           | 2.820 | 1  | 105.400 | 0.096 | 0.374  | 102.582 | 0.542         | 0.016  | 203.337 | 0.899 |
| H:E         | 0.010 | 1  | 157.422 | 0.921 | 1.219  | 105.876 | 0.272         | 0.047  | 204.787 | 0.828 |
| P:H         | 0.577 | 1  | 163.387 | 0.448 | 0.268  | 84.469  | 0.606         | 1.985  | 208.084 | 0.160 |
| P:E         | 2.187 | 1  | 98.068  | 0.142 | 0.534  | 114.656 | 0.466         | 1.550  | 219.580 | 0.214 |
| P:H:E       | 0.266 | 1  | 152.203 | 0.606 | 5.802  | 113.030 | <b>0.018*</b> | 0.188  | 201.920 | 0.665 |
| lambda      |       |    |         |       |        |         |               |        |         |       |
| <b>c9</b>   |       |    |         |       |        |         |               |        |         |       |
| P           | 0.480 | 1  | 66.395  | 0.491 | 0.917  | 109.114 | 0.340         | 1.141  | 153.358 | 0.287 |
| H           | 0.188 | 1  | 91.698  | 0.666 | 0.049  | 109.466 | 0.826         | 2.852  | 148.444 | 0.093 |
| E           | 0.090 | 1  | 71.981  | 0.765 | 0.630  | 144.534 | 0.429         | 0.850  | 153.895 | 0.358 |
| H:E         | 0.266 | 1  | 104.124 | 0.607 | 0.780  | 142.264 | 0.379         | 1.003  | 159.141 | 0.318 |
| P:H         | 0.134 | 1  | 108.670 | 0.715 | 0.953  | 110.728 | 0.331         | 0.537  | 160.021 | 0.465 |
| P:E         | 0.557 | 1  | 65.956  | 0.458 | 0.029  | 157.496 | 0.865         | 0.012  | 169.590 | 0.914 |
| P:H:E       | 0.216 | 1  | 100.006 | 0.643 | 0.007  | 155.574 | 0.935         | 0.004  | 155.848 | 0.949 |
| lambda      |       |    |         |       |        |         |               |        |         |       |
| <b>ighm</b> |       |    |         |       |        |         |               |        |         |       |
| P           | 0.317 | 1  | 43.708  | 0.577 | 1.307  | 141.344 | 0.255         | 1.008  | 201.596 | 0.317 |
| H           | 0.790 | 1  | 54.373  | 0.378 | 1.072  | 144.184 | 0.302         | 0.045  | 191.119 | 0.833 |
| E           | 0.027 | 1  | 46.316  | 0.870 | 1.064  | 190.264 | 0.304         | 0.049  | 202.838 | 0.825 |
| H:E         | 1.257 | 1  | 61.027  | 0.267 | 0.937  | 188.428 | 0.334         | 2.068  | 204.272 | 0.152 |
| P:H         | 1.115 | 1  | 62.322  | 0.295 | 0.182  | 145.069 | 0.670         | 0.018  | 207.537 | 0.894 |
| P:E         | 0.027 | 1  | 41.621  | 0.869 | 0.207  | 209.231 | 0.650         | 0.461  | 219.011 | 0.498 |
| P:H:E       | 0.282 | 1  | 61.688  | 0.597 | 0.465  | 211.431 | 0.496         | 0.005  | 201.408 | 0.946 |
| lambda      |       |    |         |       | -0.451 |         |               | -0.088 |         |       |
| <b>ly75</b> |       |    |         |       |        |         |               |        |         |       |
| P           | 1.082 | 1  | 20.530  | 0.310 | 0.005  | 104.048 | 0.945         | 1.351  | 205.572 | 0.246 |
| H           | 0.001 | 1  | 23.980  | 0.978 | 0.530  | 105.204 | 0.468         | 0.246  | 202.208 | 0.620 |
| E           | 0.006 | 1  | 23.084  | 0.937 | 0.277  | 136.426 | 0.600         | 0.064  | 202.014 | 0.801 |
| H:E         | 0.147 | 1  | 25.202  | 0.705 | 0.158  | 137.991 | 0.692         | 0.036  | 215.385 | 0.851 |
| P:H         | 0.009 | 1  | 26.684  | 0.924 | 0.173  | 107.499 | 0.678         | 1.586  | 219.331 | 0.209 |
| P:E         | 0.166 | 1  | 21.272  | 0.688 | 1.523  | 151.594 | 0.219         | 0.014  | 234.045 | 0.904 |
| P:H:E       | 0.044 | 1  | 23.066  | 0.835 | 0.268  | 150.342 | 0.606         | 1.447  | 211.076 | 0.230 |
| lambda      |       |    |         |       |        |         |               |        |         |       |

**Table S8b:** continued

| Treatment    | Lake  |    |         |       | Hybrid |         |               | Stream |         |               |
|--------------|-------|----|---------|-------|--------|---------|---------------|--------|---------|---------------|
|              | F     | Df | Df.res  | P     | F      | Df.res  | P             | F      | Df.res  | P             |
| <b>il16</b>  |       |    |         |       |        |         |               |        |         |               |
| P            | 0.684 | 1  | 59.795  | 0.411 | 0.132  | 92.735  | 0.717         | 2.472  | 146.101 | 0.118         |
| H            | 1.053 | 1  | 78.525  | 0.308 | 2.944  | 93.873  | 0.089         | 0.445  | 138.140 | 0.506         |
| E            | 0.309 | 1  | 61.986  | 0.581 | 0.260  | 119.627 | 0.611         | 1.280  | 148.670 | 0.260         |
| H:E          | 0.251 | 1  | 88.203  | 0.618 | 0.110  | 123.442 | 0.741         | 1.353  | 148.595 | 0.247         |
| P:H          | 0.681 | 1  | 89.067  | 0.411 | 0.127  | 96.984  | 0.722         | 1.574  | 148.745 | 0.212         |
| P:E          | 0.298 | 1  | 55.717  | 0.587 | 1.317  | 134.369 | 0.253         | 4.190  | 157.833 | <b>0.042</b>  |
| P:H:E        | 0.295 | 1  | 93.123  | 0.588 | 0.077  | 132.590 | 0.782         | 0.327  | 146.106 | 0.568         |
| lambda       |       |    |         |       |        |         |               |        |         |               |
| <b>mhcll</b> |       |    |         |       |        |         |               |        |         |               |
| P            | 0.514 | 1  | 97.119  | 0.475 | 2.101  | 72.616  | 0.152         | 4.971  | 160.281 | <b>0.027</b>  |
| H            | 1.857 | 1  | 144.416 | 0.175 | 6.114  | 72.724  | <b>0.016*</b> | 1.894  | 151.653 | 0.171         |
| E            | 0.221 | 1  | 105.400 | 0.639 | 1.600  | 90.439  | 0.209         | 1.862  | 162.559 | 0.174         |
| H:E          | 0.007 | 1  | 157.422 | 0.936 | 0.014  | 93.384  | 0.907         | 1.816  | 162.830 | 0.180         |
| P:H          | 0.032 | 1  | 163.387 | 0.859 | 0.011  | 75.476  | 0.917         | 3.340  | 163.700 | 0.069         |
| P:E          | 2.535 | 1  | 98.068  | 0.115 | 2.074  | 100.604 | 0.153         | 8.706  | 173.394 | <b>0.004*</b> |
| P:H:E        | 1.847 | 1  | 152.203 | 0.176 | 0.463  | 99.208  | 0.498         | 4.335  | 160.214 | 0.039         |
| lambda       |       |    |         |       |        |         |               |        |         |               |

## References

- [1] Raeymaekers JAM, Wegner KM, Huyset T, Volckaert FAM (2011) Infection dynamics of the monogenean parasite *Gyrodactylus gasterostei* on sympatric and allopatric populations of the three-spined stickleback *Gasterosteus aculeatus*. *Folia Parasitol.* 58(1):27–34.
- [2] Zietara MS, Huysse T, Lumme J, Volckaert FA (2002) Deep divergence among subgenera of *Gyrodactylus* inferred from rDNA ITS region. *Parasitology* 124(Pt 1):39–52.
- [3] Kriska G, Tittizer T (2009) *Wirbellose Tiere in den Binnengewässern Zentraleuropas: ein Bestimmungsbuch.* (Weissdorn-Verlag).
- [4] Streble H, Krauter D (2006) *Das Leben im Wassertropfen.* (Kosmos Gesellschaft der Naturfreunde Franckh'sche Verlagshandlung) Vol. 10.
- [5] Tachet H, Richoux P, Bournaud M, Usseglio-Polatera P (2000) *Invertébrés d'eau douce: systématique, biologie, écologie.* (CNRS éditions Paris).
- [6] Lenz TL, Eizaguirre C, Rotter B, Kalbe M, Milinski M (2013) Exploring local immunological adaptation of two stickleback ecotypes by experimental infection and transcriptome-wide digital gene expression analysis. *Mol. Ecol.* 22(3):774–786.
- [7] Hibbeler S, Scharsack JP, Becker S (2008) Housekeeping genes for quantitative expression studies in the three-spined stickleback *Gasterosteus aculeatus*. *BMC Mol. Biol.* 9:18.
- [8] Lenz TL, Eizaguirre C, Becker S, Reusch TBH (2009) RSCA genotyping of MHC for high-throughput evolutionary studies in the model organism three-spined stickleback *Gasterosteus aculeatus*. *BMC Evol. Biol.* 9:57.
- [9] Arvidsson S, Kwasniewski M, Riaño Pachón DM, Mueller-Roeber B (2008) QuantPrime—a flexible tool for reliable high-throughput primer design for quantitative PCR. *BMC Bioinformatics* 9:465.
- [10] Hellems J, Mortier G, De Paepe A, Speleman F, Vandesompele J (2007) qbase relative quantification framework and software for management and automated analysis of real-time quantitative PCR data. *Genome Biol.* 8(2):R19.
- [11] Kalbe M et al. (2009) Lifetime reproductive success is maximized with optimal major histocompatibility complex diversity. *Proceedings of the Royal Society of London B: Biological Sciences* 276(1658):925–934.
- [12] Team RC (2014) The R project for statistical computing. *R Foundation for Statistical Computing web-site.* [www.R-project.org](http://www.R-project.org). 9.
- [13] Benjamini Y, Yekutieli D (2001) The control of the false discovery rate in multiple testing under dependency. *Ann. Stat.* 29(4):1165–1188.
- [14] Grueber CE, Nakagawa S, Laws RJ, Jamieson IG (2011) Multimodel inference in ecology and evolution: challenges and solutions. *J. Evol. Biol.* 24(4):699–711.
- [15] Gelman A (2008) Scaling regression inputs by dividing by two standard deviations. *Stat. Med.* 27(15):2865–2873.
- [16] Yuan JS, Reed A, Chen F, Stewart, Jr CN (2006) Statistical analysis of real-time PCR data. *BMC Bioinformatics* 7:85.
- [17] Hamilton M (2009) *Population Genetics.* (Wiley).
- [18] Froese R (2006) Cube law, condition factor and weight–length relationships: history, meta-analysis and recommendations. *J. Appl. Ichthyol.* 22(4):241–253.

[19] Fay MP (2010) Confidence intervals that match fisher's exact or blaker's exact tests. *Biostatistics* 11(2):373–374.

[20] Fay MP (2010) Two-sided exact tests and matching confidence intervals for discrete data. *R J.* 2(1):53–58.
